# Supplementary material for: Biochemical and Molecular Insights into Variation in Sesame Seed Antioxidant Capability as Revealed by Metabolomics and Transcriptomics Analysis
Source: Antioxidants (Basel). 2024 Apr 25;13(5):514. doi: 10.3390/antiox13050514 (PMC11117558; doi:10.3390/antiox13050514)
Supplement: Supplementary file 1 [file antioxidants-13-00514-s001.zip › Supplementary Tables.xlsx]

## Sheet: Table S1
Table S1. List of the 400 sesame accessions analyzed in this study.
Accessions ID	Name	Origin	Seed coat color
NS061	Bawangbian2	Ancient Aohan banner,Inner Mongolia,China	Brown
NS041	Yizhima	Weinan,Shaanxi,China	Black
NS055	Yingsangu	Cangnan,Zhejiang,China	Black
NS148	Heizhima11	Shangrao,Jiangxi,China	Brown
NS251	VIR 899	Russia	Brown
NS057	Zhima40	Jiujiang,Jiangxi,China	Black
NS083	Zihuahei	Wuning,Jiangxi,China	Black
NS081	Zichagnma	Shangrao,Jiangxi,China	Brown
NS313	ALian1	ALian	Brown
NS335	725	Afghanistan	Brown
NS252	VIR 908	Turkmenistan	Brown
NS221	Zhima28	Mianning,Sichuan,China	Brown
NS054	Mishuozhima	Dongyang,Zhejiang,China	Black
NS209	Heizhima19	Sanming,Fujian,China	Black
NS202	Heizhima18	Pingjiang,Hunan,China	Black
NS027	Zhima4	Turpan,Xinjiang,China	White
NS180	Wenrenzhima	Qingyuan,Hebei,China	Brown
NS121	Hongzhima2	lueyang,Shaanxi,China	Brown
NS255	Tansang	Tanzania	White
NS287	91-2191	Israel	Brown
NS183	Zhima26	Turpan,Xinjiang,China	Brown
NS277	Oro 9/71	Mozambique	White
NS224	Zhima7	Meigu,Sichuan,China	White
NS332	Xiangheizhi2078	Xiangyang,Hubei,China	Black
NS336	K1-1	Guinea	Brown
NS167	Shangningai	Xincheng,Guangxi,China	Black
NS339	Zhongzhi12	Wuhan,Hubei,China	White
NS145	Qiancengta	Boyang,Jiangxi,China	Black
NS190	Aijiaojin	Jin Xian,Jiangxi,China	Black
NS105	Heizhima6	Feidong,Anhui,China	Brown
NS301	EC－355666	India	Black
NS286	Potepye	Myanmar	Brown
NS322	Cuba-4	Cuba	Brown
NS028	Zhima36	Turpan,Xinjiang,China	Yellow
NS064	Huangzhima4	Shangnan,Shaanxi,China	Brown
NS172	Baihuama19	Zhangpu,Fujian,China	Brown
NS144	Baizhima14	Boyang,Jiangxi,China	Brown
NS193	Chengxiangzhima	Fusui,Guangxi,China	Black
NS011	Baizhima6	Taikang,Henan,China	White
NS112	Huangchizhima	Wuhu,Anhui,China	Brown
NS034	Baizhima13	Weinan,Shaanxi,China	White
NS051	Sifangzhima	Tongcheng,Hubei,China	White
NS227	Heizhima10	Guangyuan,Sichuan,China	Black
NS363	Zhongzhi5	Wuhan,Hubei,China	White
NS246	VIR 202	Turkey	Yellow
NS089	Bachazhima	Xinping,Yunnan,China	White
NS060	Zhima19	Kang Ping,Liaoning,China	Black
NS201	Luanshanhei	You County,Hunan,China	Black
NS300	EC－355640	India	Black
NS310	VDM10D	Vietnam	Black
NS070	Zhangdianbai	Lu'an,Anhui,China	White
NS162	Datoubang	Fenghua,Zhejiang,China	Black
NS066	Huangzhima1	Taihu,Anhui,China	White
NS285	His-173	Philippines	Brown
NS031	Zhima44	Jincheng,Shanxi,China	Brown
NS320	Cuba-2	Cuba	White
NS199	Heizhima20	Dafeng,Jiangsu,China	Black
NS158	Baihuama9	Jincheng,Shanxi,China	White
NS292	Maeshae	Myanmar	Brown
NS387	Xiongzhi1	Qianjiang,Hubei,China	White
NS073	Heizhima2	Wuxi,Chongqing,China	Black
NS196	Hanguang	Yingde,Guangdong,China	Black
NS063	Baizhima3	Zhen'an,Shaanxi,China	White
NS116	Zhima2	Gaoling,Shaanxi,China	Brown
NS171	Heizhima15	Libo,Guizhou,China	Brown
NS056	Zhima17	Dexing,Jiangxi,China	White
NS053	Jinkouzhima	Jiaxing,Zhejiang,China	Black
NS205	Zhima9	Xinning,Hunan,China	White
NS062	Jiaopanzhima	Lv Liang,Shanxi,China	White
NS260	Cuba-3	Cuba	White
NS240	Shaanzhi 3	Taiyuan,Shanxi,China	White
NS020	Zhongzhi5	Wuhan,Hubei,China	White
NS308	VDM18	Vietnam	Brown
NS304	68·544	Nicaragua	White
NS059	Baizhima5	Boro,Guangdong,China	Ash
NS048	Heizhima14	Yanting,Sichuan,China	Black
NS179	Xiaobacha	Old city,Hebei,China	White
NS208	Heizhima7	Tongan,Fujian,China	Brown
NS143	Zhima10	Yueyang,Hunan,China	Brown
NS189	Zhima1	Moto,Tibet,China	Brown
NS134	Yesanjiao	Jiayu,Hubei,China	White
NS124	Heizhima8	Yao county,Shaanxi,China	Brown
NS173	Baizhima4	Shangsi,Guangxi,China	White
NS307	SE1	Vietnam	White
NS195	Silengzhima	Pingyuan,Guangdong,China	White
NS074	Wuyahei	Wuxi,Chongqing,China	Black
NS092	Tainanhei1	Tainan,Taiwan,China	White
NS186	Longshanzhima	Nanjing,Jiangsu,China	White
NS038	Zhima45	Luochuan,Shaanxi,China	White
NS069	Zhufanzhima	Jinzhai,Anhui,China	White
NS176	Bawangbian3	Wuqing,Tianjin,China	White
NS273	301(3)	Japan	Yellow
NS159	Zhima42	CiH,Shanxi,China	Brown
NS170	Baihuama12	estuary,Guizhou,China	White
NS250	VIR 896	Uzbekistan	Brown
NS392	Jingzhi1	Jing'an,Jiangxi,China	White
NS164	Baizhima9	Xingren,Guizhou,China	White
NS289	91-2299	Israel	Yellow
NS268	82NO209shat	U.S.A	White
NS197	Baihuama2	ynz,Jiangsu,China	White
NS090	Baizhima18	Longlin,Guangxi,China	White
NS389	Jihangzhi1	Shijiazhuang,Hebei,China	White
NS315	K1-3	Guinea	Brown
NS037	YeErsan	Ankang,Shaanxi,China	White
NS036	Zhima12	Shiquan,Shaanxi,China	White
NS035	Zhima25	Xianyang,Shaanxi,China	Brown
NS023	Dikehuang	Zaoyang,Hubei,China	Brown
NS258	K1-2	Guinea	Brown
NS029	Balengzhima	Fenyang,Shanxi,China	White
NS085	Zhima34	Zunyi,Guizhou,China	White
NS086	Baizhima12	Fuzhou,Fujian,China	White
NS382	Zhuzhi14	Zhumadian,Henan,China	White
NS275	Teras-<2>	Mexico	White
NS262	10(27)	Japan	Brown
NS161	Heizhima21	Qingxu,Shanxi,China	Black
NS046	Huangzhima3	Jing County,Anhui,China	White
NS211	Zhima50	auspicious clouds,Yunnan,China	White
NS104	Baihuama14	Dangtu,Anhui,China	White
NS317	K2-1	Guinea	White
NS228	Heizhima3	Mi Yi,Sichuan,China	Black
NS293	Ses-11	Bangladesh	Brown
NS393	Liaozhi2	Liaoyang,Liaoning,China	White
NS314	K1-4	Guinea	White
NS006	Silverzhima	Yantai,Shandong,China	White
NS365	Zhongzhi8	Wuhan,Hubei,China	White
NS236	Zhongzhi10	Wuhan,Hubei,China	White
NS206	Hukouzhima	Chaling,Hunan,China	Yellow
NS018	786	Wuhan,Hubei,China	White
NS321	Cuba-3	Cuba	White
NS279	82NO8NS	U.S.A	White
NS091	Baizhima10	Haikou,Hainan,China	White
NS340	Zhongzhi1	Wuhan,Hubei,China	White
NS163	Baihuama7	CEN Gong,Guizhou,China	White
NS150	Xinsheng1	Yucheng,Shandong,China	White
NS264	Teras-<1>	Mexico	White
NS040	Zhima11	Ningshan,Shaanxi,China	Black
NS263	523(41)	Japan	White
NS329	Jizhi1	Shijiazhuang,Hebei,China	Black
NS280	Nian	Korea	White
NS088	Zhima27	Kunming,Yunnan,China	Brown
NS248	VIR 231	Greece	Brown
NS330	V6	Vietnam	White
NS348	Zhuzhi18	Zhumadian,Henan,China	White
NS231	Ezhi1	Xiangyang,Hubei,China	White
NS067	Zhima46	Huayang River,Anhui,China	White
NS058	Baihuama13	Chenghai,Guangdong,China	Ash
NS233	Ezhi5	Xiangyang,Hubei,China	White
NS157	Batongzhima	Ren Qiu,Hebei,China	White
NS026	Zhima32	Frontal sensitivity,Xinjiang,China	Brown
NS222	Zhima43	Salt source,Sichuan,China	White
NS337	Suke No5-<2>	Mozambique	White
NS042	Baizhima11	Baoji,Shaanxi,China	White
NS358	Hangzhi2	Wuhan,Hubei,China	White
NS267	723(38)	Japan	White
NS341	Yuzhi4	Zhumadian,Henan,China	White
NS334	Jinzhi2	Fenyang,Shanxi,China	White
NS107	Bawangbian1	Huoqiu,Anhui,China	White
NS210	Zhima18	Chu Xiong,Yunnan,China	White
NS319	Cuba-1	Cuba	White
NS357	Ezhi4	Xiangyang,Hubei,China	White
NS232	Ezhi2	Xiangyang,Hubei,China	White
NS361	Zhongzhi28	Wuhan,Hubei,China	White
NS311	VDM40D	Vietnam	Black
NS185	Zhima15	Kashgar,Xinjiang,China	White
NS238	Zhongzhi16	Wuhan,Hubei,China	White
NS212	Baihuama5	Yongren,Yunnan,China	White
NS002	Zhima6	Jining,Shandong,China	Brown
NS175	Zhima53	Jinzhou,Liaoning,China	White
NS371	Yuzhi6	Pingyu,Henan,China	White
NS342	Yuzhi8	Zhengzhou,Henan,China	White
NS344	Zhengzhi14	Zhengzhou,Henan,China	White
NS226	Bendizhima	Yanbian,Sichuan,China	Brown
NS213	Zhima248	Yuanyang,Yunnan,China	White
NS072	Zhima58	Suxian County,Anhui,China	White
NS194	Heizhima16	Suixi,Guangdong,China	Black
NS288	No.835-1	Bangladesh	White
NS296	SINYA DANA-3	India	Black
NS084	Zhima24	Yongshun,Hunan,China	White
NS008	Yellowzhima	Xu Chang,Henan,China	Brown
NS316	K2-2	Guinea	White
NS303	S.J	Mexico	White
NS087	Zhima51	Kunming,Yunnan,China	Brown
NS354	Jizhi2	Changchun,Jilin,China	White
NS149	Qiuheima	Shangrao,Jiangxi,China	Brown
NS364	Zhongzhi7	Wuhan,Hubei,China	White
NS257	Heizhima4	Vietnam	Brown
NS359	Zhongzhi14	Wuhan,Hubei,China	White
NS253	VIR 1767	Russia	Brown
NS360	Zhongzhi17	Wuhan,Hubei,China	White
NS098	Baizhima17	Shangcai,Henan,China	White
NS204	Zhima35	Taoyuan,Hunan,China	White
NS352	Jizhi2	Shijiazhuang,Hebei,China	White
NS191	Baihuama11	Qinglong,Guizhou,China	White
NS261	341(34)	Japan	White
NS095	Zhima22	Lin County,Henan,China	White
NS181	Laohongzhima	Xichuan,Henan,China	Brown
NS230	Zhima48	Horqin,Inner Mongolia,China	White
NS282	Rucheng	Korea	Yellow
NS229	99-2188	Wuhan,Hubei,China	White
NS203	Shuanghuma	Cili,Hunan,China	White
NS368	New5	Wuhan,Hubei,China	White
NS271	342(5)	Japan	White
NS338	Baihuama17	Zhushan,Hubei,China	White
NS032	Hezhima2	Xinzhou,Shanxi,China	White
NS165	Baihuama8	Yongning,Guangxi,China	White
NS135	Fourwheels	Jingmen,Hubei,China	White
NS266	TKV-309(23)	Japan	White
NS127	Xiaoheizi	Wanxian,Chongqing,China	White
NS101	Baizhima15	Newfield,Henan,China	White
NS291	Magwe719	Myanmar	Brown
NS272	725(39)	Japan	Ash
NS169	Zhima52	Tongzi,Guizhou,China	White
NS274	Zirra	Mozambique	White
NS071	Dushanhei	Guangde,Anhui,China	White
NS235	Zhongfengzhi1	Wuhan,Hubei,China	White
NS256	Tashkent122	Russia	White
NS182	Yeersan	Pingyu,Henan,China	Brown
NS324	Zhongzhi15	Wuhan,Hubei,China	White
NS132	Yangzhima	Photochemical,Hubei,China	White
NS184	Zhima54	Bayingolin,Xinjiang,China	Yellow
NS283	Jinback	Korea	White
NS356	Liaopinzhi 2	Liaoyang,Liaoning,China	White
NS327	H98	Wuhan,Hubei,China	Black
NS225	Zhima57	Leibo,Sichuan,China	White
NS097	Waizuibai	Qi County,Henan,China	White
NS244	VIR 145	Armenia	Brown
NS047	Zhima38	Jinzhai,Anhui,China	White
NS353	Jiizhi1	Changchun,Jilin,China	White
NS115	Flowerzhima	Dan Feng,Shaanxi,China	White
NS043	Wucuolian1	Xingping,Shaanxi,China	White
NS015	Guanyinma	great enlightenment,Hubei,China	Yellow
NS216	Mazhima2	Xuanhan,Sichuan,China	White
NS394	Fenzhi2	Fenyang,Shanxi,China	White
NS168	Liusuozhima	Songyang,Zhejiang,China	White
NS239	98N09	Zhengzhou,Henan,China	White
NS242	UCLA83	Venezuela	White
NS305	68-546	Nicaragua	White
NS125	Zhima29	Fengjie,Chongqing,China	White
NS350	WanzhiNo.1	Hefei,Anhui,China	White
NS093	Heizhima13	Huaiyang,Henan,China	Black
NS033	Baihuama6	Weinan,Shaanxi,China	White
NS214	Zhima56	Nanhua,Yunnan,China	Brown
NS372	Yuzhi7	Zhumadian,Henan,China	White
NS241	Zhongzhi21	Wuhan,Hubei,China	White
NS237	Zhongzhi11	Wuhan,Hubei,China	White
NS390	Jizhi5	Changchun,Jilin,China	White
NS391	Jizhi 6	Baicheng,Jilin,China	White
NS388	Ji951	Shijiazhuang,Hebei,China	White
NS234	Ezhi6	Xiangyang,Hubei,China	White
NS323	VIR 741	Uzbekistan	Black
NS383	Zhuzhi15	Zhumadian,Henan,China	White
NS278	82NO16NS	U.S.A	White
NS217	Zhuanjiaolou1	Nanjiang,Sichuan,China	White
NS096	Youhulu	Biyang,Henan,China	White
NS220	Zhima39	Beichuan,Sichuan,China	Brown
NS343	Zhengzhi13	Zhengzhou,Henan,China	White
NS399	Zhongzhi2771	Wuhan,Hubei,China	White
NS207	Zhima49	Yuanling,Hunan,China	White
NS129	Baihuama1	Yunyang,Chongqing,China	White
NS110	Zhima23	Whole pepper,Anhui,China	White
NS270	384(7)	Japan	White
NS080	Liujiaobai	City Chuansha,Shanghai,China	White
NS215	Baihuama16	Tongjiang,Sichuan,China	White
NS397	Zhongzhi20	Wuhan,Hubei,China	White
NS369	Yuzhi10	Zhumadian,Henan,China	White
NS355	Liaopinzhi1	Liaoyang,Liaoning,China	White
NS177	Zihuama	Gaocheng,Hebei,China	Yellow
NS284	Yeoju-1	Korea	Ash
NS218	Zhima21	Leibo,Sichuan,China	White
NS325	Yiyangbai	Yiyang,Henan,China	White
NS312	Ezhi7	Xiangyang,Hubei,China	White
NS111	Dayanhei	stone table,Anhui,China	White
NS166	Baizhima2	guest,Guangxi,China	White
NS295	HNNAN-NI	India	Brown
NS156	Baizhima7	Tuscaloosa,Xinjiang,China	White
NS076	Zhima14	Zhuxi,Hubei,China	Brown
NS200	Chama2	Nantong,Jiangsu,China	White
NS265	TKV-334(22)	Japan	White
NS367	Yuzhi14	Zhengzhou,Henan,China	White
NS075	Duozhima	Yunyang,Chongqing,China	White
NS012	Xiaozihuang	Suiping,Henan,China	Brown
NS380	Yuzhi15	Zhumadian,Henan,China	White
NS050	Zhongzhi8	Wuhan,Hubei,China	White
NS219	Huangzhima2	Qingchuan,Sichuan,China	Yellow
NS151	Dabacha	Weifang,Shandong,China	White
NS065	Heizhima12	Lianyungang,Jiangsu,China	White
NS396	Zhongzhi19	Wuhan,Hubei,China	White
NS223	Zhima30	Pingwu,Sichuan,China	White
NS106	Youzhima	Feixi,Anhui,China	White
NS044	Heizhima9	Mengyin,Shandong,China	White
NS133	Zhuganqing	Huangpi,Hubei,China	White
NS362	Zhongzhi3	Wuhan,Hubei,China	White
NS154	Zhima3	Zhang Qiu,Shandong,China	White
NS174	Heizhima1	Fuchuan,Guangxi,China	Brown
NS140	Fupima	Filial piety,Hubei,China	White
NS373	Zhengzhi04c85	Zhengzhou,Henan,China	White
NS049	Zhuanzhuliang1	Suixian,Hubei,China	White
NS281	Danbai	Korea	White
NS366	Yuzhi11	Zhengzhou,Henan,China	White
NS001	Zhima13	Daxing,Beijing,China	White
NS128	Zhuanjiaolou2	Yanting,Sichuan,China	White
NS152	Daqing	Weifang,Shandong,China	White
NS137	Zhima20	Shayang,Hubei,China	White
NS349	Suxianzhima	Suxian County,Anhui,China	White
NS030	Zhima33	Lv Liang,Shanxi,China	Brown
NS333	Silegncao	Fuyang,Anhui,China	Yellow
#N/A	#N/A	#N/A	White
NS039	Xizhima	Xianyang,Shaanxi,China	Brown
NS346	Luozhi16	Luohe,Henan,China	White
NS302	EC－350643	India	Yellow
NS187	Chama1	Xuzhou,Jiangsu,China	White
NS351	Wanzhi No. 2	Hefei,Anhui,China	White
NS139	Baihuama4	Five peaks,Hubei,China	White
NS347	Zhuzhi11	Zhumadian,Henan,China	White
NS384	Zhuzhi16	Zhumadian,Henan,China	White
NS126	Baihuama3	Kaixian County,Chongqing,China	White
NS386	Wanzhi No.3	Hefei,Anhui,China	White
NS122	Baizhima19	Pingli,Shaanxi,China	White
NS198	Baizhima8	Changzhou,Jiangsu,China	White
NS381	Yuzhi2018	Zhumadian,Henan,China	White
NS370	Yuzhi5	Zhengzhou,Henan,China	White
NS331	Shuiyuan117	Korea	White
NS004	Bagucha2	Dongming,Shandong,China	Yellow
NS375	Zhengzhi2010	Zhengzhou,Henan,China	White
NS385	Zhu0019	Zhumadian,Henan,China	White
NS374	Zhengzhi12	Zhengzhou,Henan,China	White
NS345	Luozhi12	Luohe,Henan,China	White
NS005	Heshangmao	Jining,Shandong,China	Yellow
NS243	VIR 136	Armenia	Yellow
NS398	Zhuzhi20	Zhumadian,Henan,China	White
NS395	Zhongzhi18	Wuhan,Hubei,China	White
NS153	Yitiaobian	Linyi,Shandong,China	White
NS245	VIR146	U.S.A	Yellow
NS077	Mazhima3	Xingshan,Hubei,China	Brown
NS103	Bantangma	Chaoxian County,Anhui,China	White
NS306	T9	Vietnam	White
NS014	Baizhima16	Jixi,Anhui,China	Black
NS109	Ningguo yellowzhima-2	Ningguo,Anhui,China	Brown
NS379	Luozhi19	Luohe,Henan,China	White
NS160	Fenchazhima1	Linfen,Shanxi,China	Brown
NS309	VDM21	Vietnam	White
NS178	Sangucha	Qu Zhou,Hebei,China	Yellow
NS052	Huoma	Yingshan,Hubei,China	Brown
NS378	Luozhi18	Luohe,Henan,China	White
NS247	VIR 207	Turkey	Yellow
NS254	ZM11-18	Myanmar	Brown
NS013	Waizuihong	Xi county,Henan,China	Brown
NS078	Mazhima1	Fangxian,Hubei,China	Brown
NS131	Xiniujiao	Gucheng,Hubei,China	White
NS192	Luorongchuan	abatis,Guangxi,China	Black
NS318	Calinda	U.S.A	Yellow
NS147	Duoshuozhima	Jiujiang,Jiangxi,China	Black
NS298	EC－343404	India	White
NS297	BoderRacet②	Thailand	Yellow
NS045	Henan No.1	Zhengzhou,Henan,China	Brown
NS082	Haihuihei	Jiujiang,Jiangxi,China	Black
NS146	Duolengzhima	Guixi,Jiangxi,China	White
NS328	Zhima8	Sample addition,Shandong,China	Yellow
NS376	Zhengzhi97c01	Zhengzhou,Henan,China	White
NS118	Zhima37	Huayin,Shaanxi,China	White
NS068	MuZhenbai	Qingyang,Anhui,China	Black
NS276	Suke No 5-<1>	Mozambique	Yellow
NS326	Zihuayeersan	Shangcai,Henan,China	Yellow
NS079	Hezhima1	Xingshan,Hubei,China	Brown
NS119	Zhima47	Jiaxian,Shaanxi,China	Yellow
NS099	Liutiaoqing	Sheaffer,Henan,China	Brown
NS259	Heizhima5	Mexico	Brown
NS249	VIR825	Uzbekistan	Brown
NS100	Erlanghuazhima	Xiping,Henan,China	Brown
NS290	393-3Bo	Thailand	Brown
NS155	Lvjingzhi	Jiang Yichun,Black Dragon,China	Brown
NS108	Huangzhima5	Nanling,Anhui,China	Yellow
NS269	Oro short-<2>	Mozambique	Yellow
NS102	Yiyesan	Newfield,Henan,China	Brown
NS003	NewNo.5	Ju county,Shandong,China	Brown
NS022	Hongzhima1	Xiangyang,Hubei,China	Brown
NS123	Heizhima17	Yan'an,Shaanxi,China	Black
NS299	EC－342782	India	Yellow
NS141	Huangzhima11	Zhong Xiang,Hubei,China	Black
NS019	Wujiaozhan	Suixian,Hubei,China	White
NS142	Baihuama10	Zigui,Hubei,China	Black
NS188	Deleilei	Lixia River,Jiangsu,China	Yellow
NS377	Luozhi15	Luohe,Henan,China	White
NS117	Zhima16	Hengshan,Shaanxi,China	Yellow
NS021	Zhima55	great enlightenment,Hubei,China	Yellow
NS094	Sanqiang	Huaiyang,Henan,China	Brown
NS114	Tieqingzhima	Shirakawa,Shaanxi,China	Yellow
NS113	YingshangNo. 6	Yingshang,Anhui,China	Black
NS136	Qiezhima	Luo Tian,Hubei,China	Yellow
NS294	No.016211	Italy	Brown
NS138	Fazhima	Tianmen,Hubei,China	Brown
NS010	Heizhima22	New County,Henan,China	White
NS120	Zhima31	Longxian County,Shaanxi,China	Brown
NS130	Zhima5	Badong,Hubei,China	Brown
NS016	Baihuama15	Xiangyang,Hubei,China	White
NS007	Zhuzhi1	Zhumadian,Henan,China	White
NS024	Tanma	Anlu,Hubei,China	Black
NS017	Duijiaozhima	Wuchang,Hubei,China	White
NS009	Badacha1	Baofeng,Henan,China	Brown
NS025	Zhima41	Haicheng,Liaoning,China	Brown

## Sheet: Table S2
Table S2. Liquid chromatography and mass spectrometry conditions.
LC conditions
Item	Detail
Chromatographic column	Agilent SB-C18 (1.8 μm, 2.1 mm×100 mm)
Mobile phase	A: ultra-pure water (0.1% formic acid); B: acetonitrile (0.1% formic acid)
Elution gradient	0.00-9.00 min: mobile phase A: 95%; mobile phase B: 5%
	9.00-10.00 min: mobile phase A: 5%; mobile phase B: 95%
	10.00-25.10 min: mobile phase A: 95%; mobile phase B: 5%
Flow rate	0.35 mL/min
Column temperature	40°C
Sample size	2 μL
MS conditions
Item	Detail
Electrospray ionization (ESI) temperature	500°C
Ion spray voltage (IS)	5500 V (positive ion mode) /- 4500 V (negative ion mode)
Ion-source gas I (GSI)	50 psi
gas II (GSII)	60 psi
gas curtain gas (CUR)	25 psi
collision-induced ionization parameters	High
Instrument tuning and quality calibration	In QQQ and LIT modes with 10 and 100 μmol/L polypropylene glycol solutions, respectively.
The QQQ scan	MRM mode
The collision gas (nitrogen) Medium
The DP and CE of the individual MRM ion pairs were completed by further declustering potential (DP) and collision energy (CE) optimization.
A specific group of MRM ion pairs was monitored in each period based on the metabolite’s elution within each period.
LC-ESI-MS/MS system	UPLC, Shim-pack UFLC SHIMADZU CBM A system
MS	QTRAP® 4500+
Triple quadrupole-linear ion trap (Q TRAP)	AB4500 Q TRAP UPLC/MS/MS System
Data collection	Analyst 1.6.3 software (AB Sciex)

## Sheet: Table S3
Table S3. List of the 785 identified phenolic compounds and their relative contents in high (HA) and low (LA) antioxidant seeds.
Index	Q1 (Da)	Q3 (Da)	Molecular weight (Da)	Formula	Ionization model	Compounds	Class	CAS	cpd_ID	Average relative content
										HA-1	HA-2	HA-3	LA-1	LA-2	LA-3	QC01	QC02	QC03
Zbln005846	577.19	161.02	578.202	C28H34O13	[M-H]-	((3R,4R,5R)-3,4-dihydroxy-5-(((2S,3R,4R,5S,6S)-3,4,5-trihydroxy-6-(4-hydroxyphenethoxy)tetrahydro-2H-pyran-2-yl)methoxy)tetrahydrofuran-3-yl)methyl(E)-3-(4-hydroxyphenyl)acrylate	Phenolic acids	-	-	1.22508e+06	4.29072e+06	1.13145e+06	260319	71062.8	78263.4	1.04531e+06	1.07742e+06	1.01456e+06
Wbwn005757	341.14	311.09	342.147	C20H22O5	[M-H]-	(2r,3r,4s)-6-hydroxy-4-(4-hydroxy-3-methoxyphenyl)-7-methoxy-2,3-dimethyl-3,4-dihydro-2h-naphthalen-1-one	Lignans	-	-	558965	180582	1.18533e+06	59507.8	19165.9	50052.4	400993	409870	448678
Wbwp006397	357.13	307.1	356.126	C20H20O6	[M+H]+	(3r,4r)-3-(2h-1,3-benzodioxol-5-ylmethyl)-4-[(4-hydroxy-3-methoxyphenyl)methyl]oxolan-2-one*	Lignans	-	-	2.3181e+06	2.07045e+06	6.98587e+06	547858	889029	1.36919e+06	2.43736e+06	2.35037e+06	2.31363e+06
Wbwp006279	355.12	135.04	354.11	C20H18O6	[M+H]+	(6R,7R,8R)-8-(1,3-benzodioxol-5-yl)-6-hydroxy-6,7-dimethyl-7,8-dihydrobenzo[f][1,3]benzodioxol-5-one	Lignans	-	-	754237	1.44862e+06	1.99143e+06	611376	782453	284147	996548	1.03034e+06	1.09954e+06
Lmsp102909	371.21	133.1	370.199	C19H30O7	[M+H]+	(6S,9R)-Deoxysappanol	Phenolic acids	-	-	166800	76164.9	217322	91404.7	170312	43304.4	88676.2	73065.9	106625
Lhhp102923	327.16	137.06	326.152	C20H22O4	[M+H]+	(7'R,8'R)-7'8'-dihydro-7'-(5'-hydroxy-3'-methoxphenyl)-3-methoxy-8'-methyl-1-(E)-propenylbenzof-uran	Lignans	-	-	4.19517e+06	1.70426e+06	4.39978e+06	60851.2	140075	394545	2.20726e+06	2.00324e+06	2.03695e+06
Zahn005590	359.15	329.14	360.157	C20H24O6	[M-H]-	(7'S,8R,8'R)-3,5'-dimethoxy-3',4,9'-trihydroxy-7',9-epoxy-8,8'-lignan	Lignans	-	-	959148	151132	412276	22902.8	6657.75	58526.6	260276	270907	298022
Lhjp120734	267.12	147.04	266.115	C14H18O5	[M+H]+	1',2'-epoxy-4-isobutyryl coniferol	Coumarins	-	-	18340	37745.1	80441.4	23110.1	124789	64891.3	61770.7	57939.3	61816.8
Lmnn002886	477.14	179.03	478.147	C23H26O11	[M-H]-	1'-O-(3,4-Dihydroxyphenethyl)-O-caffeoyl-glucoside	Phenolic acids	-	-	405984	235887	140650	9323.99	6013.76	8340	125682	125733	114561
Hmgp003423	321.06	291.01	320.053	C15H12O8	[M+H]+	1,3,6,8-Tetrahydroxy-2,7-Dimethoxyxanthone	Other Flavonoids	-	-	280935	391896	1.36003e+06	11141	20462.3	96180.4	372488	350530	364625
Hmgp002947	335.08	247.06	334.069	C16H14O8	[M+H]+	1,3,6-Trihydroxy-2,5,7-trimethoxyxanthone	Other Flavonoids	-	-	619605	545317	1.23063e+06	388380	710955	327555	640521	637099	649714
Wbtn005483	333.06	165.02	334.069	C16H14O8	[M-H]-	1,3,6-trihydroxy-2,5,7-trimethoxyxanthen-9-one	Other Flavonoids	-	-	4368.78	4562.74	105469	4985.95	3706.84	5540.74	29417.2	25084.7	29603.3
Hmpp003343	355.15	137.05	354.147	C21H22O5	[M+H]+	1,7-Bis(4-Hydroxy-3-Methoxyphenyl)Hepta-4,6-Dien-3-One*	Phenolic acids	-	-	2.24927e+06	733765	1.69199e+06	66640.5	60689.3	105798	855122	854560	853361
pmp001007	289.07	274.05	288.063	C15H12O6	[M+H]+	1,7-Dihydroxy-2,3-dimethoxyxanthone	Other Flavonoids	78405-33-1	-	14570.6	22366.3	49940.6	14913.1	3117.8	3715.94	20098	17014	15951.6
Zbjp002681	359.18	137.06	358.178	C21H26O5	[M+H]+	1,7-bis(4-hydroxy-3-methoxyphenyl)hept-1-ene-3-ol	Phenolic acids	-	-	1.03803e+07	4.44268e+06	1.24095e+07	387333	309136	339510	4.47252e+06	4.72236e+06	4.44413e+06
Zbjp002910	357.17	137.06	356.162	C21H24O5	[M+H]+	1,7-bis(4-hydroxy-3-methoxyphenyl)hept-6-ene-3-one	Phenolic acids	-	-	3.71373e+06	2.93128e+06	5.65948e+06	421998	589027	920290	2.29945e+06	2.25763e+06	2.37671e+06
Zbfn002690	299.08	93.03	300.084	C13H16O8	[M-H]-	1-(4-Hydroxybenzoyl)Glucose; 25545-07-7	Phenolic acids	-	-	254570	336105	657417	31934.6	175360	87990.3	283284	260565	274301
pmn001681	165.09	149.06	166.099	C10H14O2	[M-H]-	1-(4-Methoxyphenyl)-1-propanol	Phenolic acids	5349-60-0	-	543649	535333	476852	540866	539123	545114	467915	439703	449416
pmp000086	269.1	177.05	268.095	C13H16O6	[M+H]+	1-Feruloyl-sn-glycerol	Phenolic acids	-	-	42443.4	23340	16205.7	42552.7	46125.1	145080	61685	30775.4	37210
pmn001375	535.18	373.13	536.189	C26H32O12	[M-H]-	1-Hydroxypinoresinol-1-O-Glucoside	Lignans	81495-71-8	-	5490545	1.3142e+07	5.73225e+06	1.17921e+06	1.60731e+06	789927	7657245	9496630	5.87446e+06
Zmcn003729	535.18	373.13	536.189	C26H32O12	[M-H]-	1-Hydroxypinoresinol-4'-O-Glucoside	Lignans	-	-	1.8275e+07	8.79608e+07	4.80989e+07	3.27991e+06	4.20851e+06	1.9823e+06	2.76246e+07	3.03703e+07	2.96443e+07
MWS2066	143.05	115.06	144.058	C10H8O	[M-H]-	1-Naphthol*	Phenolic acids	90-15-3	C11714	18809.9	30918.4	17444	17680.8	19235.6	17720.8	19679.2	18815.3	22403.4
Wasn002933	373.11	211.06	374.121	C16H22O10	[M-H]-	1-O-(3,4,5-Trimethoxybenzoyl)-B-D-Glucopyranoside	Phenolic acids	-	-	2.08276e+06	1.70445e+06	3.20591e+06	894908	1.95325e+06	2.67229e+06	1.85238e+06	1.86064e+06	1.81724e+06
Lmsn002288	503.14	341.09	504.148	C21H28O14	[M-H]-	1-O-Caffeoyl-(6-O-glucosyl)-β-D-glucose	Phenolic acids	-	-	40740.2	40922.6	79696.7	27510.9	26888.7	10440.6	39932.8	45222.7	86634
Lmsn002548	341.09	161.02	342.095	C15H18O9	[M-H]-	1-O-Caffeoyl-β-D-glucose	Phenolic acids	14364-08-0	C10433	475412	224221	461677	110661	119500	75152.3	231529	214364	237970
Hmbp003234	255.09	163.03	254.079	C12H14O6	[M+H]+	1-O-Caffeoylglycerol	Phenolic acids	-	-	106428	82232.9	60610.4	44985.7	19431.3	28340	66265.2	71069	79707.9
Zmhn002422	355.103	193.052	356.111	C16H20O9	[M-H]-	1-O-Feruloyl-β-D-glucose*	Phenolic acids	7196-71-6	C17759	1.06843e+07	1.58501e+07	5.14881e+06	4.2619e+06	2.30037e+06	1.02282e+06	5.3986e+06	5.0873e+06	5.82519e+06
pma3724	369.12	177.05	368.111	C17H20O9	[M+H]+	1-O-Feruloylquinic acid	Phenolic acids	-	-	169875	196466	69682.7	41050.1	34795.9	10005	140851	86539.4	129277
MWS20201	333.08	171.03	332.074	C13H16O10	[M+H]+	1-O-Galloyl-β-D-glucose	Phenolic acids	58511-73-2	C01158	36619.6	54625.8	39537.2	61301.6	135196	50877.4	45460	38827.9	39995.5
pmb2871	315.07	153.02	316.079	C13H16O9	[M-H]-	1-O-Gentisoyl-D-glucoside*	Phenolic acids	23445-11-6	-	641358	1.21352e+06	973644	484107	566316	534912	667684	593647	652078
Lmsn002247	299.08	137.02	300.084	C13H16O8	[M-H]-	1-O-Salicyloyl-β-D-glucose*	Phenolic acids	60517-74-0	-	1.50509e+06	4.44579e+06	4.15801e+06	4.10989e+06	946351	2.13115e+06	2.58609e+06	2.5623e+06	2.57026e+06
HJN003	385.113	223.062	386.121	C17H22O10	[M-H]-	1-O-Sinapoyl-β-D-glucose	Phenolic acids	-	C01175	1.33425e+06	527014	827400	438870	783685	199304	541481	529179	534829
Lmtn002565	329.11	167.03	330.095	C14H18O9	[M-H]-	1-O-Vanilloyl-D-Glucose	Phenolic acids	-	C20470	188977	980282	280877	209841	169454	152338	329895	284098	299203
pmn001419	325.09	163.04	326.1	C15H18O8	[M-H]-	1-O-[(E)-p-Cumaroyl]-D-glucose	Phenolic acids	-	-	3.8571e+06	509948	1.20837e+07	1.69679e+06	892486	1.00343e+06	4.19435e+06	3.55771e+06	3.5632e+06
Lmsn003111	325.09	145.03	326.1	C15H18O8	[M-H]-	1-O-p-Coumaroyl-β-D-glucose*	Phenolic acids	7139-64-2	C16827	2.15898e+07	3.43891e+06	7.27142e+07	7.53845e+06	4.85886e+06	5.65226e+06	2.31508e+07	2.07489e+07	2.06168e+07
pmb3068	337.09	163.04	338.1	C16H18O8	[M-H]-	1-O-p-Coumaroylquinic acid	Phenolic acids	-	-	204695	214949	338364	231483	177171	113815	259619	161426	129262
pmn001320	237.08	163.04	238.084	C12H14O5	[M-H]-	1-O-p-Cumaroylglycerol	Phenolic acids	106055-11-2	-	61118.8	19185.8	93831.1	17215.6	6556.61	8857.09	31663	45700.3	35614.3
Zmgp004297	281.15	107.05	280.146	C19H20O2	[M+H]+	1-phenyl-7-(4-hydroxyphenyl)-4-ene-3-heptanone	Phenolic acids	-	-	660003	766251	753478	858273	968842	902511	384952	373301	368488
Sacn002893	403.12	223.06	404.132	C17H24O11	[M-H]-	10-acetylmonomelittoside	Phenolic acids	-	-	63281.3	27111.9	24073.1	20540.2	9041.64	22063.9	43121.5	24102.5	30394.1
Sacn003282	403.12	241.07	404.132	C17H24O11	[M-H]-	10-hydroxymajoroside	Phenolic acids	-	-	526504	359062	563092	5985.66	8392.19	14306.4	162063	146247	146443
Zbdp009034	353.07	323.06	352.058	C19H12O7	[M+H]+	12α-Hydroxydolineone	Other Flavonoids	-	-	4.73037e+06	2.17535e+06	3.91438e+06	7.46535e+06	4.23901e+06	3.74386e+06	3.79389e+06	3.69766e+06	3.75573e+06
Lmqn006260	301.036	151.003	302.043	C15H10O7	[M-H]-	2',3',4',5,7-Pentahydroxyflavone	Flavones	-	-	4186.44	3945.09	2.14831e+06	3405.18	3752.45	1575.39	533611	559187	467439
Hmdp001950	303.12	195.09	302.115	C17H18O5	[M+H]+	2',7-Dihydroxy-3',4'-dimethoxyisoflavan	Other Flavonoids	52250-35-8	-	2.00588e+06	335881	3.37155e+06	106094	22225.4	41029.2	776669	775673	752693
mws1153	665.21	161.02	666.216	C31H38O16	[M-H]-	2'-Acetylacteoside	Phenolic acids	94492-24-7	-	3.90389e+06	76579.6	816513	16256.5	15005	23523.5	626002	592516	531778
Lmmp004504	287.06	153.02	286.048	C15H10O6	[M+H]+	2'-Hydroxygenistein*	Isoflavones	1156-78-1	C12134	5945.97	6279.97	1.31143e+06	6932.97	2660	4678.11	562347	522391	571547
Wbtp005060	465.13	303.05	464.132	C22H24O11	[M+H]+	2,3,5-trimethoxy-1-{[(2s,3r,4s,5s,6r)-3,4,5-trihydroxy-6-(hydroxymethyl)oxan-2-yl]oxy}xanthen-9-one	Other Flavonoids	-	-	52518.3	94013.7	3.3998e+06	102205	51922.5	35529.4	928314	1015241	805829
Wmmp000176	483.07	277.03	482.07	C20H18O14	[M+H]+	2,3-(s)-hexahydroxydibenzoyl glucose	Tannin	-	-	76640.5	120116	89986.3	140106	44043.8	55819.3	91169.8	80995.6	78068.1
mws0639	153.02	109.03	154.027	C7H6O4	[M-H]-	2,3-Dihydroxybenzoic Acid*	Phenolic acids	303-38-8	C00196	1.38705e+06	867448	1.30014e+06	1.14234e+06	873182	905822	1.00964e+06	942866	914721
Wdzn005354	501.1	307.05	502.111	C24H22O12	[M-H]-	2,3-dihydroxy-2,3-bis[(2e)-3-(4-hydroxy-3-methoxyphenyl)prop-2-enoyl]butanedioic acid*	Phenolic acids	-	-	2.47361e+06	487579	7.03969e+06	294748	1.70206e+06	234033	1.9175e+06	1.80282e+06	1.85403e+06
Xmgp006913	341.14	137.06	340.131	C20H20O5	[M+H]+	2,4,2',4'-tetrahydroxy-3'-prenylchalcone	Chalcones	-	-	4.89526e+06	2.25785e+06	7.13046e+06	351407	409810	481364	2.22929e+06	2.33814e+06	2.21707e+06
Lmbn013410	205.16	189.13	206.167	C14H22O	[M-H]-	2,4-Di-Tert-Butylphenol*	Phenolic acids	96-76-4	-	172075	180235	163522	183706	163156	183092	172342	171875	174688
Lasp003640	183.06	77.04	182.058	C9H10O4	[M+H]+	2,4-Dihydroxy-6-methoxyacetophenone	Phenolic acids	3602-54-8	-	507171	943579	530147	315191	481666	247291	381779	379254	420788
MWSmce581	137.03	91.02	138.032	C7H6O3	[M-H]-	2,4-Dihydroxybenzaldehyde	Phenolic acids	95-01-2	-	157770	31091.3	208053	30460.2	11270.2	5287.29	73604.5	74048.1	74700.6
mws0885	153.02	109.03	154.027	C7H6O4	[M-H]-	2,4-Dihydroxybenzoic acid	Phenolic acids	89-86-1	-	602197	391788	593001	168059	104462	263848	361335	323313	235581
MA10002917	183	109.02	184.012	C6H4N2O5	[M-H]-	2,4-Dinitrophenol	Phenolic acids	51-28-5	C02496	173220	103551	60404.1	164139	155131	162024	129701	122946	109922
Wbwp006280	373.13	135.04	372.121	C20H20O7	[M+H]+	2,5-Bis(1,3-benzodioxol-5-yl)-3,4-dimethyloxolane-2,3-diol	Lignans	-	-	90427	103390	129074	57718	46323.4	38869.3	73638.4	91311.2	66272.6
Wcdn001824	315.07	153.02	316.079	C13H16O9	[M-H]-	2,5-Dihydroxybenzoic acid-5-O-glucoside	Phenolic acids	-	-	455420	825036	855585	366425	392973	358738	418896	416489	418517
mws0180	153.019	109.029	154.027	C7H6O4	[M-H]-	2,5-Dihydroxybenzoic acid; Gentisic Acid*	Phenolic acids	490-79-9	C00628	689089	402938	611242	546844	424027	424086	495765	441936	432024
Lakn000379	665.22	383.12	666.237	C28H42O18	[M-H]-	2,5-Dihydroxyphenylacetate ethyl triglucoside	Phenolic acids	-	-	1.71493e+07	1.98566e+07	1.6453e+07	2.44032e+07	3.39402e+07	1.82256e+07	2.02578e+07	2.20088e+07	2.02496e+07
Zbfn005854	471.13	163.04	472.137	C24H24O10	[M-H]-	2,6-Di-(4-hydroxycinnamoyl)glucoside	Phenolic acids	-	-	721804	225219	1.46151e+06	161130	157243	150683	522637	478917	425131
Zbfn006124	531.15	193.05	532.158	C26H28O12	[M-H]-	2,6-Di-Feruloyl glucoside	Phenolic acids	-	-	4.26995e+07	1.81141e+07	3.19616e+07	2.09395e+06	1.37648e+07	536593	1.69372e+07	1.69868e+07	16081582
Lmln010063	205.16	189.13	206.167	C14H22O	[M-H]-	2,6-Di-tert-butylphenol*	Phenolic acids	128-39-2	-	167962	176443	159057	178310	171361	181441	168553	162462	169789
MWSmce587	183.06	165.06	182.058	C9H10O4	[M+H]+	2,6-Dimethoxybenzoic acid	Phenolic acids	1466-76-8	-	20005	98370	31675	18340	25560.3	25005	42805.2	28833.1	47178.3
Zbdp002220	333.12	171.06	332.111	C14H20O9	[M+H]+	2,6-Dimethoxypydroquinone-1-O-glucoside	Other Flavonoids	-	-	84588.5	45751.4	56381	32779.6	62780.2	44140.8	46862.2	47109.5	48231.2
Yshj000011	333.12	171.06	332.111	C14H20O9	[M+H]+	2,6-dimethoxy-4-hydroxyphenyl-1-O-beta-D-glucopyranoside	Phenolic acids	-	-	84588.5	45751.4	56381	32779.6	62780.2	44140.8	46862.2	47109.5	48231.2
Zbfn004680	625.17	463.12	626.185	C28H34O16	[M-H]-	2-(3,4-Dihydroxyphenethoxy)-6-(3,4,5-trihydroxycaffeoyl)-O-arabinopyranosyl-D-glucose	Phenolic acids	-	-	17500.9	21675	84742.9	31808.4	24148.4	17088	34185.2	31210.3	28931.7
Zbln005189	607.2	461.17	608.211	C29H36O14	[M-H]-	2-(3,4-Dihydroxyphenethyl)-5-O-Cinnamoyl-gentiobioside	Phenolic acids	-	-	81635.8	20506.6	81989	16532.3	11670	11236	26562.6	36936.1	39661.9
Jmwn002117	331.1	153.02	332.111	C14H20O9	[M-H]-	2-(3,4-dihydroxyphenyl)ethanediol 1-O-β-D-glucopyranoside*	Phenolic acids	-	-	23540.2	15766.6	19881.6	18273.6	24399.5	56110	23090.5	22948.6	20323.5
Zbln004255	653.21	487.15	654.222	C30H38O16	[M-H]-	2-(3-Hydroxy-4-methoxyphenethyl)-5-O-(2-hydroxycaffeoyl)-gentiobioside	Phenolic acids	-	-	194442	66579.7	112720	30314.9	3340	9667.46	82719.7	78005	60619.3
pme3083	164.04	120.05	165.043	C8H7NO3	[M-H]-	2-(Formylamino)benzoic acid	Phenolic acids	3342-77-6	C05653	7.89531e+06	821107	2.48121e+07	782385	254592	446904	6.75786e+06	6.81524e+06	6.5593e+06
Lmtn003441	311.11	149.06	312.121	C15H20O7	[M-H]-	2-Acetyl-3-hydroxyphenyl-1-O-glucoside	Phenolic acids	-	-	286847	45947.8	464456	92087.1	74142.1	88496.7	219707	209154	185745
NK10253223	168.06	94.06	167.058	C8H9NO3	[M+H]+	2-Amino-3-methoxybenzoic acid	Phenolic acids	3177-80-8	C05831	209477	148902	245654	130407	118195	123017	155689	157849	157153
Hmsn001911	301.09	139.04	302.1	C13H18O8	[M-H]-	2-Beta-Glucopyranosyloxy-3-Hydroxybenzyl Alcohol	Phenolic acids	20331-85-5	-	53355.9	75389	139426	60897.5	53012.6	61799.1	70700.6	68537.3	68718.3
Lmhn001477	311.04	179.04	312.048	C13H12O9	[M-H]-	2-Caffeoyl-L-tartaric acid (Caftaric acid)	Phenolic acids	67879-58-7	-	35253.9	29137.3	35324.9	7373.72	16321.8	16559.2	18867	24569.8	19472.3
Zmyn014236	309.17	96.96	310.181	C14H30O5S	[M-H]-	2-Dodecoxyethyl Hydrogen Sulfate	Phenolic acids	48073-44-5	-	49055.6	41780.8	42620.7	38423	36322.7	36163.3	41128.8	40746.3	41741.6
Zbfn006009	501.14	163.04	502.147	C25H26O11	[M-H]-	2-Feruloyl-6-(4-hydroxycinnamoyl)glucoside	Phenolic acids	-	-	3.22419e+06	824328	3.317e+06	149989	481937	65744.5	1.26198e+06	1.28097e+06	1.20273e+06
Zbfn005497	517.13	323.08	518.142	C25H26O12	[M-H]-	2-Feruloyl-6-caffeoyl glucoside	Phenolic acids	-	-	1.48002e+06	51679.9	81321.3	15213.6	197044	6583.65	267416	226145	178648
pmp000087	269.1	177.05	268.095	C13H16O6	[M+H]+	2-Feruloyl-sn-glycerol	Phenolic acids	-	-	66609.5	41680	185129	309136	163757	477424	218734	174737	195597
Lmrn001951	181.05	135.04	182.058	C9H10O4	[M-H]-	2-Hydroxy-3-(4-Hydroxyphenyl)Propanoic Acid*	Phenolic acids	23508-35-2	-	220345	223872	265512	108380	59769.2	85169.5	133795	134028	118784
Lmrn003000	165.06	103.06	166.063	C9H10O3	[M-H]-	2-Hydroxy-3-phenylpropanoic acid	Phenolic acids	7326-19-4	C05607	66104.5	93879.3	66892.3	141224	52367.9	58895	78663	66710.8	56353.3
Lmbn001930	121.03	77.04	122.037	C7H6O2	[M-H]-	2-Hydroxybenzaldehyde (Salicylaldehyde)	Phenolic acids	90-02-8	C06202	378671	211565	293963	212945	361619	222300	237628	203437	255073
Lmmn001643	163.04	119.05	164.047	C9H8O3	[M-H]-	2-Hydroxycinnamic acid*	Phenolic acids	583-17-5	C01772	2.42958e+06	227612	8.11742e+06	235145	85641.8	150899	1.99876e+06	2.06135e+06	1.90645e+06
Lmxp001668	151.08	91.05	150.068	C9H10O2	[M+H]+	2-Methoxy-4-ethenylphenol	Phenolic acids	7786-61-0	C17883	741040	536140	1.83853e+06	295417	112375	135607	607654	612959	630738
MWS2069	139.08	77.04	138.068	C8H10O2	[M+H]+	2-Methoxy-4-methylphenol	Phenolic acids	93-51-6	-	2.09133e+06	2.18418e+06	1.97823e+06	2.15882e+06	2.11178e+06	1.99328e+06	1.39746e+06	1.38171e+06	1.38768e+06
NK10252689	168.03	123.01	169.037	C7H7NO4	[M-H]-	2-Methoxy-5-nitrophenol	Phenolic acids	636-93-1	C17385	349159	121204	101467	77421	30872.9	105131	201139	237765	245707
Zmyn002919	135.04	91.05	136.052	C8H8O2	[M-H]-	2-Methylbenzoic acid	Phenolic acids	118-90-1	C07215	61686.8	53667.5	60916.6	66205.3	19909.9	32927.3	53508.7	44285.5	40432.3
MWS1875	143.05	115.05	144.058	C10H8O	[M-H]-	2-Naphthol*	Phenolic acids	135-19-3	C11713	18218.5	30822.7	14351	15494	20127.4	17543.7	19822	18690.8	19314.1
Labn004625	415.16	89.02	416.168	C19H28O10	[M-H]-	2-Phenylethyl beta-primeveroside	Phenolic acids	129932-48-5	-	345737	28814.5	262703	184661	27914.2	89962.7	139412	188986	172413
Lmbp000728	121.06	77.04	120.058	C8H8O	[M+H]+	2-Phenyloxirane	Phenolic acids	20780-54-5	C20782	445294	753236	627282	1.35722e+06	2.65274e+06	430523	896282	867806	873986
Jmgn005927	287.06	125.03	288.063	C15H12O6	[M-H]-	2-hydroxynaringenin	Flavanones	-	-	27602.1	28507.9	63152.4	32293.7	105626	21384.4	50228.4	46488.2	41567.3
Lakn001671	329.09	123.05	330.095	C14H18O9	[M-H]-	2-β-D-Glucopyranosyloxy-5-hydroxy-phenylacetic acid	Phenolic acids	-	-	154477	165500	204049	148941	219173	121452	152759	135276	127506
Lakn003294	343.1	181.05	344.111	C15H20O9	[M-H]-	2-β-D-Glucopyranosyloxy-5-hydroxyphenylacetic acidmethylester*	Phenolic acids	-	-	82038.1	216413	245202	189052	180138	112223	155229	158052	177085
Lmtp003948	481.13	319.05	480.127	C22H24O12	[M+H]+	3',5',5,7-Tetrahydroxy-4'-methoxyflavanone-3'-O-glucoside	Flavones	-	-	61593.9	62732.1	3.69354e+06	68935	53842.2	128882	604245	742242	761360
Lajp006434	507.15	345.1	506.142	C24H26O12	[M+H]+	3',5'-dihydroxy-5,7,4'-trimethoxyflavone glucoside	Flavones	-	-	18607.6	76690	622004	29964.3	62368.2	62285.9	128097	128312	122074
Lmsp004301	451.12	289.07	450.116	C21H22O11	[M+H]+	3',5,5',7-Tetrahydroxyflavanone-7-O-glucoside*	Flavanones	-	-	373788	308791	794953	350806	258295	261167	291908	316334	311009
Lmtp006213	289.14	135.08	288.136	C17H20O4	[M+H]+	3'-Hydroxy-3,4,5-trimethoxybibenzyl	Stilbene	-	-	47952.1	47540.1	129517	79938.8	4299.92	80316.1	52746.5	71945.7	65957.1
Wabn003563	385.11	179.07	386.121	C17H22O10	[M-H]-	3'-O-Beta-D-Glucopyranosyl plumbagic acid	Phenolic acids	-	-	1.11146e+06	2.98071e+06	882405	767866	2.35413e+06	706278	1.28779e+06	1.27471e+06	1.25049e+06
Wayn004109	477.07	315.01	478.075	C21H18O13	[M-H]-	3'-O-Methylellagic acid 4-O-beta-D-glucoside	Tannin	-	-	525308	559356	367240	148708	53086.4	443840	311177	259049	296949
Zbsp003857	479.12	317.06	478.111	C22H22O12	[M+H]+	3'-O-Methyltricetin-5-O-glucoside*	Flavones	-	-	9.05932e+06	8.45955e+06	5.76505e+06	2.14083e+06	850988	7.43409e+06	3.95279e+06	4.55776e+06	4.50748e+06
Zbsp004450	479.12	317.07	478.111	C22H22O12	[M+H]+	3'-O-Methyltricetin-7-O-glucoside*	Flavones	-	-	8.59265e+06	8.49982e+06	5.63627e+06	2.3948e+06	990492	8.36791e+06	4.43021e+06	4.4677e+06	4.82041e+06
Zbfn002169	487.15	145.03	488.153	C21H28O13	[M-H]-	3'-p-Coumaroyl-sucrose	Phenolic acids	-	-	1.92043e+06	261769	3.58613e+06	277900	69565.2	188408	985325	991896	994752
Zmpp002571	303.05	257.05	302.043	C15H10O7	[M+H]+	3,3',4',5',7-Pentahydroxyflavone; Robinetin	Flavonols	490-31-3	C10177	478285	515830	3.1233e+06	256963	64872.5	493744	780971	795647	881578
Wayn005368	491.08	329.03	492.09	C22H20O13	[M-H]-	3,3'-Di-O-Methylellagic acid 4'-glucoside	Tannin	51803-68-0	-	70053.3	106653	1.33072e+07	89377.6	28655.1	37229	3.7493e+06	3.66009e+06	3.60212e+06
Wdtp003420	357.12	177.05	356.111	C16H20O9	[M+H]+	3,4,5-Trihydroxy-6-[[3-(4-methoxyphenyl)oxiran-2-yl]methoxy]oxane-2-carboxylic acid	Phenolic acids	-	-	1.63025e+06	3.00709e+06	510043	28699.2	214775	23827.1	1196680	942191	716542
pme0428	237.08	103.02	238.084	C12H14O5	[M-H]-	3,4,5-Trimethoxycinnamic acid	Phenolic acids	90-50-6	-	34708.5	13066.7	1622.96	41715.8	13560.6	76114.5	12667.1	12151.5	16365.2
Wdtp003528	369.12	207.07	368.111	C17H20O9	[M+H]+	3,4,5-trihydroxy-6-[4-[[(2R)-5-oxooxolan-2-yl]methyl]phenoxy]oxane-2-carboxylic acid	Phenolic acids	-	-	2.23422e+06	1.03312e+06	2.40468e+06	96440	63350	63478.3	1.00887e+06	951740	962773
MWSmce439	147.05	119.05	148.052	C9H8O2	[M-H]-	3,4-Dihydrocoumarin	Coumarins	119-84-6	C02274	6527.26	18417.7	191910	7297.73	5449.36	14808.6	47908.4	54226.8	57494.5
Zbln005108	443.16	149.06	444.163	C20H28O11	[M-H]-	3,4-Dihydroxyallylbenzene-4-O-xylosyl(1→6)glucoside	Phenolic acids	-	-	1.33617e+06	53409.8	817295	434255	75544.5	224957	489466	487629	522356
pme2598	167.03	123.05	168.042	C8H8O4	[M-H]-	3,4-Dihydroxybenzeneacetic acid*	Phenolic acids	102-32-9	C01161	937371	2.09521e+06	1.46139e+06	1.11044e+06	1.21692e+06	1.14722e+06	1.21195e+06	1.20369e+06	1.31593e+06
mws0160	181.05	109.03	182.058	C9H10O4	[M-H]-	3,4-Dihydroxybenzoic Acid Ethyl Ester (Protocatechuic acid ethyl ester)	Phenolic acids	3943-89-3	-	25444.1	13449.5	11467.4	26601.1	26201.6	18713.4	45100.3	34393.7	29681.7
mws0183	153.02	109.03	154.027	C7H6O4	[M-H]-	3,4-Dihydroxybenzoic acid (Protocatechuic acid)*	Phenolic acids	99-50-3	C00230	1.15954e+06	790867	1.13576e+06	881950	773165	898337	896195	842039	737355
Zmjn003003	181.05	122.04	182.058	C9H10O4	[M-H]-	3,4-Dimethoxybenzoic acid; Veratric acid*	Phenolic acids	93-07-2	-	36685.7	11515.9	61231.8	55305	43097	46932.3	37366	43787.9	30391.3
MWSmce332	209.08	191.07	208.074	C11H12O4	[M+H]+	3,4-Dimethoxycinnamic acid	Phenolic acids	2316-26-9	-	752793	229423	1.57636e+06	696716	110937	616475	661394	707040	646573
mws0612	195.07	121.03	196.074	C10H12O4	[M-H]-	3,4-Dimethoxyphenyl acetic acid	Phenolic acids	93-40-3	-	107135	48454.8	132653	13340	10640	20005	47105.4	53709.4	62383
Lckn000312	623.2	161.03	624.205	C29H36O15	[M-H]-	3,4-dihydroxy-β-phenylethoxy-O-α-L-rhamnopyranosyl(1→3)-6-O-caffeoyl(cis)-β-D-glucopyranoside*	Phenolic acids	-	-	8.90292e+07	1.22004e+07	4.70846e+07	4.5479e+06	748331	1.61294e+06	25861467	2.10046e+07	2.29924e+07
Laln002027	431.12	137.02	432.127	C18H24O12	[M-H]-	3,4-dihydroxybenzaldehyde-xylose-glucoside*	Phenolic acids	-	-	16876.5	20106.1	17203.3	12473.5	18517	12543.3	12760.5	13291.4	14685.7
Jmwn002172	315.11	135.04	316.116	C14H20O8	[M-H]-	3,4-dihydroxyphenylethanol-β-D-glucopyranoside	Phenolic acids	-	-	50161.6	49445.2	62830.4	47990.7	38982.4	28832.1	46332.9	42831.3	37032.3
pmp000117	433.15	403.11	432.142	C22H24O9	[M+H]+	3,5,6,7,8,3',4'-Heptamethoxyflavone	Flavonols	1178-24-1	-	24668.3	15912.8	38911.2	13396.8	3326.06	5853.45	16866.5	16474.6	14340.4
Zbqn006065	285.041	133.03	286.048	C15H10O6	[M-H]-	3,5,7,2'-Tetrahydroxyflavone; Datiscetin	Flavones	480-15-9	C10036	8014.46	3341.53	1.33071e+06	5286.25	3997.05	2471.95	240801	247432	243262
mws0914	271.061	151.003	272.068	C15H12O5	[M-H]-	3,5,7-Trihydroxyflavanone (Pinobanksin)*	Flavanonols	548-82-3	C09826	73973.4	38920.3	728255	61178.7	5014.44	20053.4	250277	236385	236110
Wmzn002116	515.12	353.09	516.127	C25H24O12	[M-H]-	3,5-Dicaffeoylquinic acid	Phenolic acids	-	-	87663.3	30718.2	111147	24516.1	19146.8	29936.9	64769.2	73486.7	65354.2
HJN037	183.03	124.02	184.037	C8H8O5	[M-H]-	3,5-Dihydroxy-4-methoxybenzoic acid; 4-O-Methylgallic Acid*	Phenolic acids	4319-02-2	-	221956	68199	58618.3	11670	21083	36202.5	77295.3	98909.2	85977.4
Lmgn009690	313.071	255.031	314.079	C17H14O6	[M-H]-	3,5-Dihydroxy-7,4'-dimethoxyflavone	Flavonols	15486-33-6	-	1664.63	6443.86	158233	8155.34	4590.57	6321.02	25099.3	25895.6	26216.2
Lmjn003562	693.2	175.04	694.211	C32H38O17	[M-H]-	3,6'-Diferuloylsucrose	Phenolic acids	107172-40-7	-	79768.7	3340	2635.35	2392.56	3579.04	2852.43	23929.5	19383.3	20511.2
Lamn004579	655.18	331.08	656.195	C29H36O17	[M-H]-	3-(3,4-dihydroxybenzyl)-5,7-dihydroxy-6-methoxychroman-4-one diglucoside	Other Flavonoids	-	-	5257.25	12635.2	587767	1670	3515.27	1670	114033	123340	125993
MWS3046	181.05	121.03	182.058	C9H10O4	[M-H]-	3-(3-Hydroxyphenyl)-3-hydroxypropanoic acid	Phenolic acids	3247-75-4	-	65489	231178	152973	85107.7	31151.1	33280.5	97519.7	90988.9	90248.4
mws0346	165.06	106.04	166.063	C9H10O3	[M-H]-	3-(3-Hydroxyphenyl)-propionic acid	Phenolic acids	621-54-5	C11457	51667.2	21551.6	24848	9058.63	12846.1	41573.1	22833.5	22326.5	19770.8
mws0467	165.06	119.05	166.063	C9H10O3	[M-H]-	3-(4-Hydroxyphenyl)-propionic acid	Phenolic acids	501-97-3	C01744	318604	58350	1.02685e+06	28792.2	20005	58350	238863	295328	279358
MWSHC20102	197.08	151.04	196.074	C10H12O4	[M+H]+	3-Hydroxy-1-(4-Hydroxy-3-Methoxyphenyl)Propan-1-One	Phenolic acids	2196-18-1	-	1.60307e+06	1.49054e+06	6.91136e+06	1337543	2.36802e+06	1.99254e+06	2.49125e+06	2.49932e+06	2.59812e+06
pmn001690	327.14	165.09	328.152	C16H24O7	[M-H]-	3-Hydroxy-4-isopropylbenzylalcohol-3-O-glucoside	Phenolic acids	-	-	112292	45765.8	40264.5	269851	91294.5	62593.8	74695.2	79237	63058.4
MWSslk066	169.05	65.04	168.042	C8H8O4	[M+H]+	3-Hydroxy-4-methoxybenzoic acid; Isovanillic Acid	Phenolic acids	645-08-9	-	5.12526e+06	2.01211e+06	4.1892e+06	1.75919e+06	975897	1.45268e+06	3.44781e+06	3.37427e+06	2.83398e+06
MWSmce248	163.045	119.054	164.047	C9H8O3	[M-H]-	3-Hydroxycinnamic Acid*	Phenolic acids	14755-02-3	C12621	1.07605e+06	174775	3.50777e+06	147636	48606.8	121747	1.71763e+06	813512	1.26877e+06
Wmln000659	193.07	101.02	194.058	C10H10O4	[M-H]-	3-Methyl-4,8-dihydroxy-3,4-dihydroisocoumarin	Coumarins	33788-22-6	-	27041.4	30833	13454.2	46147.4	32498.7	49839.9	47096.4	43577.4	40881.2
Zmgn001989	123.05	65.04	124.052	C7H8O2	[M-H]-	3-Methylcatechol	Phenolic acids	488-17-5	C02923	35826.4	19266.5	31662.3	10267.3	10870.2	13247	25155.4	18766.8	22344.1
Lmcp004624	301.07	258.05	300.063	C16H12O6	[M+H]+	3-Methylkaempferol	Flavonols	1592-70-7	C05902	41680	11670	66453.2	6872.68	10436.6	18340	19998.1	15005	19465.7
Hmln000659	331.07	169.01	332.074	C13H16O10	[M-H]-	3-O-Galloyl-D-glucose*	Phenolic acids	-	-	318837	278887	523186	287308	432472	316971	315984	279625	268806
Lmtn002671	183.03	139.04	184.037	C8H8O5	[M-H]-	3-O-Methylgallic Acid	Phenolic acids	3934-84-7	C05616	111840	229116	69781.2	253676	243506	366287	249138	94111.2	149581
Lmmn004912	315.05	271.02	316.058	C16H12O7	[M-H]-	3-O-Methylquercetin	Flavonols	1486-70-0	C04443	73470.2	216267	613572	14656	54115.8	824982	237594	237301	249604
Zaln004082	335.08	179.03	336.084	C16H16O8	[M-H]-	3-O-caffeoylshikimic acid*	Phenolic acids	-	-	1.57173e+06	118109	1.06693e+06	200270	17213.7	27151.9	456054	420547	397287
Lmsp004151	629.11	163.04	628.106	C29H24O16	[M+H]+	3-O-p-Coumaroyl-4,6-(S)-HHDP-β-D-glucose	Phenolic acids	-	-	15005	6814.54	28436.8	15615.3	15587.2	12324.1	8012.34	12419.9	21204.3
pmn001421	337.09	191.06	338.1	C16H18O8	[M-H]-	3-O-p-Coumaroylquinic acid*	Phenolic acids	87099-71-6	-	117011	84835.8	113177	97881.6	91711.7	76590.4	112061	48332.3	60367.5
pmb3064	499.15	163.2	500.153	C22H28O13	[M-H]-	3-O-p-Coumaroylquinic acid-O-glucoside	Phenolic acids	-	-	5106.65	14045.5	30805.7	8430.52	3839.34	9092.78	19651.7	17202	13356.2
pmb3075	319.08	145.03	320.09	C16H16O7	[M-H]-	3-O-p-Coumaroylshikimic acid	Phenolic acids	-	-	63461.7	34019.2	66685	37301.5	35230.8	5005	29416.4	40373.5	49509.6
Wcfp003437	325.14	175.07	324.136	C20H20O4	[M+H]+	3-Prenyl-4,2',4'-Trihydroxychalcone	Chalcones	202815-28-9	-	760002	504993	906355	158878	161765	157575	477672	390313	465713
Lamp006750	579.13	331.08	578.127	C26H26O15	[M+H]+	3-[(3,4-dihydroxyphenyl)methylidene]-5,7-dihydroxy-6-methoxy-2h-1-benzopyran-4-one malonyl glucoside*	Other Flavonoids	-	-	47462.7	43345	188775	15208.3	18397.7	15684.7	41179.1	60705.9	42726.7
Jmwn002494	325.09	119.05	326.1	C15H18O8	[M-H]-	3-[4-(β-D-glucopyranoside)-phenylacrylic]-acid	Phenolic acids	-	-	861817	2.79703e+06	8.58376e+06	1.50607e+06	534647	1.09711e+06	3.56182e+06	3.19386e+06	3.30674e+06
Lckn000311	651.23	175.04	652.237	C31H40O15	[M-H]-	3-hydroxy-4-methoxy-β-phenylethoxy-O-α-L-rhamnopyranosyl-(1→3)-4-O-feruloyl(trans)-β-D-glucopyranoside*	Phenolic acids	-	-	1.39151e+06	1.80337e+06	1.68361e+06	61276	60266.2	71291.2	871630	930069	830974
Lmgp002593	123.04	77.04	122.037	C7H6O2	[M+H]+	3-hydroxybenzaldehyde	Phenolic acids	100-83-4	C03067	1.34358e+06	426828	847581	74297.6	94526.2	358132	582430	622646	609809
MWS4301	151.041	107.05	152.047	C8H8O3	[M-H]-	3-hydroxyphenylacetic acid*	Phenolic acids	621-37-4	C05593	160595	49483.1	128080	30586.6	26902.9	29253.7	69544.1	72437.7	106389
Lckn000313	607.22	149.04	608.232	C26H40O16	[M-H]-	3-methoxy-4-hydroxy-β-phenylethoxy-O-β-D-apiofuranosyl-(1→4)-α-L-rhamnopyranosyl-(1→3)-β-D-glucopyranoside	Phenolic acids	-	-	21911.5	18488.4	10910.4	52740.7	18474.1	12135.2	20047.1	18356.2	18398.3
pmp000004	331.08	316.06	330.074	C17H14O7	[M+H]+	4',5,7-Trihydroxy-3',6-dimethoxyflavone (Jaceosidin)*	Flavones	18085-97-7	-	25136.9	11620	1.80978e+07	12397.3	6143.67	1931.24	4.87329e+06	4.91967e+06	5.05537e+06
Lmsp008392	315.09	272.07	314.079	C17H14O6	[M+H]+	4',5-Dihydroxy-3',5'-dimethoxyflavone	Flavones	-	-	1896.87	1833.88	146563	5126.65	954	1495.22	21532.7	22296.3	18010.1
Hajp008429	301.11	181.05	300.1	C17H16O5	[M+H]+	4',5-dihydroxy-7-methoxy-6-methylfavanone	Flavones	-	-	4873.54	17225.4	21795.2	15528.9	12379.4	510273	68955.8	69601.2	73877.9
pmc1990	299.092	119.05	300.1	C17H16O5	[M-H]-	4'-Hydroxy-5,7-dimethoxyflavanone	Flavanones	-	-	768.06	3007.89	601.3	902.132	988.204	216729	32471	33872.2	34096
Wbtp006564	317.07	302.04	316.058	C16H12O7	[M+H]+	4,8,10-trihydroxy-2-methoxy-1h,2h-furo[3,2-a]xanthen-11-one	Other Flavonoids	-	-	41793.1	2762.9	3.18013e+07	34330.5	10372.5	6518.24	6.75778e+06	6.47915e+06	6.61998e+06
MWSmce467	149.06	108.02	150.068	C9H10O2	[M-H]-	4-Allylcatechol	Phenolic acids	1126-61-0	-	152204	5521.7	75015.1	7140.81	2303.74	3207.38	42124.7	32685.5	37765
mws1336	138.06	120.04	137.048	C7H7NO2	[M+H]+	4-Aminobenzoic acid	Phenolic acids	150-13-0	C00568	1.04291e+06	534130	1.25933e+06	477715	620015	870514	673954	707766	687755
ML10177402	152.03	108.05	153.043	C7H7NO3	[M-H]-	4-Aminosalicylic acid	Phenolic acids	65-49-6	C02518	15785.7	12241.5	15316.1	6337.11	8282.21	10157.5	10031.4	10197.3	11945.2
Jmwn004308	637.21	475.16	638.221	C30H38O15	[M-H]-	4-Dihydroxyphenethoxy-8-O-[6-O-(4-O-glucosyl)feruloyl]glucoside	Phenolic acids	-	-	798050	388475	253979	95492.6	41789.4	23477.3	195505	215591	187875
pmb1587	207.14	165.09	206.131	C13H18O2	[M+H]+	4-Hydroxy-3,5-diisopropylbenzaldehyde	Phenolic acids	10537-86-7	-	25381.7	29155	26063.6	31013.1	32871.1	28991.2	33023.6	23331.4	28933.8
pmb2497	197.05	153.06	198.053	C9H10O5	[M-H]-	4-Hydroxy-3-methoxymandelate	Phenolic acids	55-10-7	C05584	103707	122533	91231.2	131179	97252.2	117764	86342.4	101025	93583.2
MWSmce466	135.05	92.03	136.052	C8H8O2	[M-H]-	4-Hydroxyacetophenone	Phenolic acids	99-93-4	C10700	1.38864e+06	403886	1.19626e+06	329705	331429	545193	686587	713088	728488
mws0749	137.02	93.03	138.032	C7H6O3	[M-H]-	4-Hydroxybenzoic acid	Phenolic acids	99-96-7	C00156	9.95904e+06	6.01984e+06	2.9579e+07	6.81453e+06	2.74811e+06	7.39884e+06	1.03207e+07	1.06056e+07	1.03083e+07
Lakn002075	431.12	137.02	432.127	C18H24O12	[M-H]-	4-Hydroxybenzoic acid glucosyl xyloside*	Phenolic acids	-	-	19134.6	21546.7	17139.2	12486.5	11894.9	11027.1	12897	13809.3	13100.1
Labn004065	341.09	137.03	342.095	C15H18O9	[M-H]-	4-Hydroxybenzoyl acetyl glucoside	Phenolic acids	-	-	28455.1	44201.2	58375	29889.8	12887.5	23853.1	43861.9	41006.5	43896.7
pme2996	161.024	117.035	162.032	C9H6O3	[M-H]-	4-Hydroxycoumarin	Coumarins	1076-38-6	C20414	108386	57285	73864.6	108045	48160.4	149223	83949	85440	80215.1
pmb2723	485.13	323.2	486.137	C21H26O13	[M-H]-	4-Hydroxycoumarin di-glucoside	Coumarins	-	-	57279.6	32524.2	72375.8	50785.1	45675.8	32460	57133.7	36118.1	38831.8
Jmwn004371	667.22	505.17	668.232	C31H40O16	[M-H]-	4-Hydroxyphenethoxy-8-O-β-D-[6-O-(4-O-β-D-glucopyranosyl)-sinapoyl]glucopyranoside	Phenolic acids	-	-	225829	899564	374488	197311	247130	103905	287671	296574	279712
MWSmce370	151.04	107.05	152.047	C8H8O3	[M-H]-	4-Hydroxyphenylacetic acid*	Phenolic acids	156-38-7	C00642	167904	63624.2	127833	30184.7	20491.5	45751.4	66866.5	78653.8	80770.2
MWS5206	181.05	135.04	182.058	C9H10O4	[M-H]-	4-Hydroxyphenyllactic Acid*	Phenolic acids	306-23-0	C03672	221796	284450	285522	113777	60547.9	96190.7	139816	171142	150437
Sayp007578	371.11	149.02	370.105	C20H18O7	[M+H]+	4-HydroxyseSamin*	Lignans	-	-	6.93545e+06	4.01469e+06	5.32195e+06	9.42452e+06	5.51331e+06	5.01577e+06	5.52023e+06	4.89278e+06	5.41505e+06
Hmgn002833	371.11	297.11	372.121	C20H20O7	[M-H]-	4-Ketopinoresinol	Lignans	66288-89-9	-	128833	72388.1	277350	28777.5	20239.4	45909	79814.7	75811.1	73363.6
Lmbn004847	179.07	146.04	180.079	C10H12O3	[M-H]-	4-Methoxyphenylpropionic acid	Phenolic acids	-	-	149481	42407.9	152090	28340	8748.57	18340	74792.6	60229.2	61871.4
MWS2099	137.06	77.04	136.052	C8H8O2	[M+H]+	4-Methylbenzoic acid	Phenolic acids	99-94-5	C01454	2.34773e+06	687721	1.22311e+06	222428	403032	256046	845842	1.00659e+06	915103
pme2828	140.03	98.96	139.027	C6H5NO3	[M+H]+	4-Nitrophenol	Phenolic acids	100-02-7	C00870	4.55203e+07	1.55215e+07	3.64807e+07	1.46121e+07	3.35955e+07	1.26183e+07	2.70784e+07	2.60807e+07	2.63093e+07
Zmhn001358	299.08	137.02	300.084	C13H16O8	[M-H]-	4-O-Glucosyl-4-hydroxybenzoic acid*	Phenolic acids	-	-	1.55872e+06	1.86189e+06	4.79321e+06	321741	349381	422992	1.64953e+06	1.49684e+06	1.56952e+06
Zmhn002227	385.11	223.06	386.121	C17H22O10	[M-H]-	4-O-Glucosyl-sinapate	Phenolic acids	-	C02919	2.37321e+06	5.65665e+06	1.76907e+06	1.63573e+06	4.165e+06	1.37736e+06	2.48436e+06	2.3919e+06	2.4993e+06
Wdtp010604	383.2	267.12	382.199	C20H30O7	[M+H]+	4-Octylphenol-1-O-glucuronide	Phenolic acids	-	-	57868.9	56493.6	58888.4	59864.5	59437.5	59024.4	56002.4	58683.8	61765.6
Zaln004057	335.08	179.03	336.084	C16H16O8	[M-H]-	4-caffeoylshikimic acid*	Phenolic acids	-	-	1.69205e+06	118883	1.17667e+06	213326	16020.8	17873.2	507158	512166	402836
MWSCX017	165.05	119.05	164.047	C9H8O3	[M+H]+	4-hydroxyphenyl acrylaldehyde	Phenolic acids	-	-	8774040	1038780	1.74733e+07	846326	544375	707794	5.40592e+06	4.93637e+06	5117097
Zmhn002508	471.15	309.1	472.158	C21H28O12	[M-H]-	4-p-Cumaroyl-rhamnosyl-(1→6)-D-glucose	Phenolic acids	-	-	30393.6	8943.14	115527	25416.8	34803.5	17516	32760.3	34104.5	45807
Lmzn001582	387.17	207.1	388.173	C18H28O9	[M-H]-	5'-Glucosyloxyjasmanic acid	Phenolic acids	-	-	135262	65020	148624	59128.1	41647.5	31291.7	110288	79035.2	109893
Lmmn002260	551.21	389.17	552.221	C27H36O12	[M-H]-	5'-Methoxyisolariciresinol-9'-O-glucoside	Lignans	-	-	443118	603020	224327	412665	1.41572e+06	149653	521267	519494	501880
Hmln002355	549.2	387.15	550.205	C27H34O12	[M-H]-	5'-Methoxymatairesinoside*	Lignans	1691201-82-7	-	712876	2822705	157922	129057	99029.4	143455	376426	423920	437948
Lagp004342	523.14	361.1	522.137	C24H26O13	[M+H]+	5,2',5'-Trihydroxy-3,7,4'-trimethoxyflavone-2'-O-β-D-glucoside*	Flavones	-	-	31675	311605	459133	18892.9	23763.1	267503	201866	126730	129219
Yyyn008289	313.072	298.048	314.079	C17H14O6	[M-H]-	5,3'-Dihydroxy-7,4'-Dimethoxyflavone	Flavones	32174-62-2	-	7579.3	14002.8	1.41939e+06	24150.7	9452.41	9633.19	207657	215286	213886
mws0038	313.07	283.02	314.079	C17H14O6	[M-H]-	5,4'-Dihydroxy-3,7-dimethoxyflavone(Kumatakenin)	Flavonols	3301-49-3	-	2887.74	4249.58	475954	9033.13	3998.82	3761.17	72878.1	73888.8	74497.9
Zmjp004852	509.13	347.08	508.122	C23H24O13	[M+H]+	5,6,3',4'-Tetrahydroxy-3,7-dimethoxyflavone-6-O-glucoside	Flavones	-	-	122275	102685	641695	48366.8	104322	154660	204989	184264	259889
Lmdp006479	331.08	298.04	330.074	C17H14O7	[M+H]+	5,6,4'-Trihydroxy-7,3'-dimethoxyflavone	Flavones	-	-	14220.7	10865.6	1.1597e+07	12537.7	5868.69	6513.72	3.14058e+06	3.16813e+06	3.24507e+06
Layp005773	521.17	359.11	520.158	C25H28O12	[M+H]+	5,6,7,3',-Tetramethyl-4'-hydroxyflavone glucoside*	Flavones	-	-	285803	180161	224248	172641	357839	204480	291831	250977	262581
HJAP058	345.1	284.07	344.126	C19H20O6	[M+H]+	5,6,7,4'-Tetramethoxyflavanone	Flavanones	2569-77-9	C15118	4126.37	4121.68	27618.8	23189.7	9136.66	6313.18	15888.4	13191.6	10888.4
Zmjp004795	301.07	286.05	300.063	C16H12O6	[M+H]+	5,6,7-Tetrahydroxy-8-methoxyflavone*	Flavones	-	-	259856	314383	3.54796e+07	218437	26317.2	22549.2	8.36909e+06	8.29762e+06	7.94681e+06
MWSslk182	313.11	283.07	312.1	C18H16O5	[M+H]+	5,6,7-Trimethoxyflavone	Flavones	973-67-1	-	12576.6	3788.54	8622.97	18103.3	15665.3	12450.1	10394.6	8883.86	11076.9
Zmhn003257	299.06	284.04	300.063	C16H12O6	[M-H]-	5,7,2'-Trihydroxy-8-methoxyflavone*	Flavones	-	-	311052	334831	2.52393e+07	228497	18493.4	28699.1	8.40222e+06	8.63267e+06	8.67352e+06
Hmqn003268	303.052	151.03	304.058	C15H12O7	[M-H]-	5,7,3',4',5'-Pentahydroxydihydroflavone	Flavanones	-	-	35732.3	16075.3	322774	18229.8	7989.23	5399.73	80656.5	86459	61173.8
Lmnp002448	641.17	479.11	640.164	C28H32O17	[M+H]+	5,7,3',4'-Tetrahydroxy-6-methoxyflavone-8-C-[glucosyl-(1-2)]-glucoside	Flavones	-	-	73355	94995.6	5.48139e+06	24437.3	23884.5	28340	1.02566e+06	894474	867724
Hajp007218	301.07	286.05	300.063	C16H12O6	[M+H]+	5,7,3',5'-tetrahydroxy-6-methylfavanone*	Flavones	-	-	251629	284526	3.5929e+07	212490	24467.7	21903.1	8.38484e+06	8.20029e+06	8.42998e+06
Hmgn002254	345.06	285.04	346.069	C17H14O8	[M-H]-	5,7,3'-Trihydroxy-4,6,5'-trimethoxyxanthone	Other Flavonoids	-	-	193256	132151	211072	119446	114365	74661.7	100109	102072	117291
pmp000010	347.08	332.05	346.069	C17H14O8	[M+H]+	5,7,4',5'-Tetrahydro-3',6-dimethoxyflavone	Flavones	-	-	193025	207751	2.95559e+06	3414.84	2567.81	8006.98	572744	600048	528465
Lssp210437	301.07	286.05	300.063	C16H12O6	[M+H]+	5,7,4'-Trihydroxy-3'-methoxyisoflavone; 3'-O-Methylorobol*	Isoflavones	36190-95-1	-	262929	285758	3.54804e+07	231923	25360.4	19851.5	8.13221e+06	8.28641e+06	7.93365e+06
Lmgp004539	655.19	331.08	654.18	C29H34O17	[M+H]+	5,7,4'-Trihydroxy-6,8-dimethoxyisoflavone-7-O-galactoside-glucoside	Isoflavones	-	-	33544.1	6343.23	6.98979e+06	8340	13340	3815.33	1.13894e+06	1.07905e+06	1.07132e+06
Lmgp003803	655.19	331.08	654.18	C29H34O17	[M+H]+	5,7,4'-Trihydroxy-6,8-dimethoxyisoflavone-7-O-galactoside-rhamnose	Isoflavones	-	-	25893.6	17564	1.19227e+07	25426.6	14973.1	16273.5	2.13239e+06	2.09182e+06	2.09326e+06
Wagp010241	403.14	373.09	402.132	C21H22O8	[M+H]+	5,7,8,3',4',5'-Hexamethoxyflavone	Flavones	-	-	5987.52	3935.37	26009.6	15540.5	14027.4	7166.31	9554.69	10389	10667.9
mws1474	345.1	284.07	344.09	C18H16O7	[M+H]+	5,7-Dihydroxy-3',4',5'-trimethoxyflavone	Flavones	18103-42-9	C19807	14351.4	14177.3	136919	144125	46613.4	29960.1	42890	56725.6	52446
MWSmce221	193.05	91.05	192.042	C10H8O4	[M+H]+	5,7-Dihydroxy-4-methylcoumarin	Coumarins	2107-76-8	-	564390	72860.6	90035	100623	57400.8	98407.8	68689.2	90035	96705
Hmtn001120	315.11	153.06	316.116	C14H20O8	[M-H]-	5-(2-Hydroxyethyl)-2-O-glucosylphenol*	Phenolic acids	-	-	2.18674e+06	1.65075e+06	3.16559e+06	1.88264e+06	1.47941e+06	840901	1.67557e+06	1.53702e+06	1.31826e+06
Lmmn003663	329.09	167.04	330.095	C14H18O9	[M-H]-	5-Glucosyloxy-2-Hydroxybenzoic acid methyl ester	Phenolic acids	-	-	199801	1.06059e+06	268279	216265	161293	169290	313038	264235	337643
Wagp009942	359.11	344.09	358.105	C19H18O7	[M+H]+	5-Hydroxy-3,7,3',4'-tetramethoxyflavone (Retusin)*	Flavones	1245-15-4	-	18035.7	10877.1	178022	62349.5	71078.1	45549	55150.5	47251.3	52435.3
Zmjp008503	329.1	296.07	328.095	C18H16O6	[M+H]+	5-Hydroxy-4',6,7-trimethoxyflavone (Salvigenin)	Flavones	19103-54-9	-	13790.8	38862.8	496185	93300.7	30030	29629.6	100425	100331	104369
pmp000008	359.11	344.09	358.105	C19H18O7	[M+H]+	5-Hydroxy-6,7,3',4'-tetramethoxyflavone*	Flavones	21763-80-4	-	15340.9	12995.8	162201	57095.6	74629.6	48494.9	50986.6	51013.4	49235.2
Wagp005813	521.16	359.11	520.158	C25H28O12	[M+H]+	5-Hydroxy-7,8,2',3'-Tetramethoxyflavone 5-Glucoside*	Flavones	-	-	1.66477e+06	1.05792e+06	4.62836e+06	58725.8	57934.5	206166	1.45905e+06	1.41626e+06	1.31019e+06
Lmqn001795	267.066	109.028	268.074	C16H12O4	[M-H]-	5-Hydroxy-7-methoxyflavone	Flavones	-	-	148966	28417.6	86521.8	7321.14	7074.75	5885.84	63338.8	39461.5	51217.3
MWSHC20125	335.08	135.05	336.084	C16H16O8	[M-H]-	5-O-Caffeoylshikimic acid	Phenolic acids	73263-62-4	-	1.29043e+06	87119.6	900486	152861	7998.87	19061.1	356610	316716	322434
Zmhn001703	331.07	169.02	332.074	C13H16O10	[M-H]-	5-O-Galloyl-D-hamamelose*	Phenolic acids	-	-	298145	262029	524701	273536	394417	310014	303521	268521	266789
pmb3074	337.09	191.06	338.1	C16H18O8	[M-H]-	5-O-p-Coumaroylquinic acid*	Phenolic acids	1899-30-5	C12208	103232	77448.2	107610	80427.9	73365.7	41188.9	107867	59089.7	61601.6
pmb3066	481.14	319.2	482.142	C22H26O12	[M-H]-	5-O-p-Coumaroylshikimic acid O-glucoside	Phenolic acids	-	-	39520.5	88184.7	102309	14076.8	16484.1	14744.8	28849	22976.8	20430.4
Lakp003115	313.09	151.04	312.084	C14H16O8	[M+H]+	5-O-β-D-Glucopyranosyl-3-hydrobenzo(b)fu-ran-2-one	Phenolic acids	-	-	1.69203e+07	1.4263e+07	8.07959e+06	229749	463883	573014	6.9042e+06	7.12728e+06	7.12292e+06
Wbwp010459	343.15	163.07	342.147	C20H22O5	[M+H]+	5-[(2r,3s,4s,5s)-5-(2h-1,3-benzodioxol-5-yl)-3,4-dimethyloxolan-2-yl]-2-methoxyphenol	Lignans	-	-	15886.5	20767.5	20868.5	16084.2	18487.7	20295.1	15343	15356.6	15446.8
Lajp005489	551.18	389.13	550.169	C26H30O13	[M+H]+	5-hydroxy-6,7,3',4',5'-pentamethoxyflavone glucoside	Flavones	-	-	31675	141866	1.93788e+06	14021.1	67572.8	273783	616421	497909	493402
Lajp005213	521.16	359.11	520.158	C25H28O12	[M+H]+	5-hydroxy-7,8,3',4'-tetramethoxyflavone glucoside*	Flavones	-	-	2.00378e+06	1.21053e+06	2.78011e+06	77053.3	33112.8	194477	1.40931e+06	1.10719e+06	1.0475e+06
Zjmp102046	357.13	135.04	356.126	C20H20O6	[M+H]+	5-methoxy-6-methyl-7-hydroxy-8-aldehydo-3(3',4'-methylenedioxybenzyl)-chroman-4-one	Other Flavonoids	-	-	111657	50595.2	91117.9	62747.2	87425.8	73464.6	86921.3	86605.2	91514
Hmbn002692	517.16	175.04	518.164	C22H30O14	[M-H]-	6'-O-Feruloyl-D-sucrose	Phenolic acids	118230-77-6	-	1.48356e+06	551392	1.32712e+06	165617	53774.4	62267.1	620289	633758	699885
Lmsn003628	547.17	223.06	548.174	C23H32O15	[M-H]-	6'-O-Sinapoylsucrose*	Phenolic acids	-	-	519554	137005	250361	123658	67820.9	53350	184413	157486	179185
Zmhp003514	301.07	286.05	300.063	C16H12O6	[M+H]+	6,7,8-Tetrahydroxy-5-methoxyflavone*	Flavones	-	-	273750	287958	3.70036e+07	213730	23048.5	28993	8.43669e+06	8.58037e+06	8.51265e+06
Zbdn007423	207.07	192.04	208.074	C11H12O4	[M-H]-	6,7-Dimethoxy-4-chromanone	Other Flavonoids	-	-	224798	51935.2	132092	21538.2	10914.5	17644.8	86303.2	88196.7	85610.5
pme3131	221.08	177.05	220.074	C12H12O4	[M+H]+	6,7-Dimethoxy-4-methylcoumarin	Coumarins	4281-40-7	-	44021.8	13034	24368.8	33296.9	18202.4	188065	22336.2	27754.6	46417.2
Wbtn006810	287.05	135.04	288.063	C15H12O6	[M-H]-	6,7-dihydroxy-1,3-dimethoxyxanthen-9-one	Other Flavonoids	-	-	9259.28	5603.21	3.06402e+06	10197.7	2201.01	2773.63	837469	842908	814763
Layp008369	409.2	177.02	408.194	C25H28O5	[M+H]+	6,8-Diprenylnaringenin; Lonchocarpol A	Flavanones	68236-11-3	C09724	286658	309035	549792	251677	103606	43151.4	235685	251495	237847
Jmgn004021	449.11	269.05	450.116	C21H22O11	[M-H]-	6-C-Glucosyl-2-Hydroxynaringenin	Flavanones	-	-	157945	134162	178972	175931	159062	107156	234184	121249	111686
Lmjp003655	463.12	301.08	462.116	C22H22O11	[M+H]+	6-C-MethylKaempferol-3-glucoside*	Flavonols	-	-	280176	300830	3.06305e+07	366702	195458	156588	5.64357e+06	5.50681e+06	5.83437e+06
Yphn012690	407.187	407.192	408.194	C25H28O5	[M-H]-	6-Geranylnaringenin; Mimulone; Bonannione A	Flavanones	97126-57-3	-	121937	51341.1	160337	41513.1	83045.4	46997.6	78353.5	74358.7	74015.7
Zmyn003693	267.07	252.04	268.074	C16H12O4	[M-H]-	6-Hydroxy-2'-methoxyflavone	Flavones	61546-59-6	C15203	5111.6	4362.58	9196.15	5261.18	5651.52	4549.16	5178.88	6279.88	5654.56
Lmsn004132	329.094	167.04	330.11	C18H18O6	[M-H]-	6-Hydroxy-4',5,7-trimethoxyflavanone; Hamiltone A	Flavanones	6626-61-5	-	213595	994603	266464	242738	137584	154748	363602	254022	324419
Wbmn002185	365.06	167.03	366.074	C20H14O7	[M-H]-	6-Hydroxy-4-(4-hydroxy-3-methoxyphenyl)-7-methoxy-naphtho[2,3-c]furan-1,3-dione-1	Lignans	-	-	132863	400185	215787	221130	221202	238689	224574	254773	269777
Lmsp011263	329.1	268.08	328.095	C18H16O6	[M+H]+	6-Hydroxy-5,7,4'-trimethoxyflavone	Flavones	6938-19-8	C14985	6787.87	12917.9	172900	29016.4	14807.4	10044.8	35783.8	35049.1	35623.6
Zbsp004940	193.05	133.03	192.042	C10H8O4	[M+H]+	6-Hydroxy-7-methoxycoumarin	Coumarins	-	-	1.08313e+06	506867	631777	359512	358883	252485	618966	620591	681346
pmp001309	465.1	303.1	464.096	C21H20O12	[M+H]+	6-Hydroxykaempferol-7-O-glucoside	Flavonols	-	-	56740.7	93370	361709	163430	68040	63392	175027	147208	131007
Hmcn002875	301.035	255.02	302.043	C15H10O7	[M-H]-	6-Hydroxyluteolin	Flavones	18003-33-3	C10072	88098.9	159755	605596	3515.52	4194.86	19904.4	208746	233401	252400
Hmcn001884	463.09	301.03	464.096	C21H20O12	[M-H]-	6-Hydroxyluteolin 5-glucoside*	Flavones	-	-	302084	500738	4.65368e+06	370794	348414	250227	1.20476e+06	1.09449e+06	1.04241e+06
Lmjp003295	479.12	317.07	478.111	C22H22O12	[M+H]+	6-Methoxykaempferol-3-O-glucoside*	Flavones	63422-27-5	-	345453	601329	1.1692e+07	283289	123135	414555	1.97735e+06	1.96921e+06	2.07367e+06
mws0987	161.06	115.05	160.052	C10H8O2	[M+H]+	6-MethylCoumarin	Coumarins	92-48-8	-	775453	250855	519676	471273	422306	308274	398468	385478	374215
Ymjm000116	313.09	151.04	314.1	C14H18O8	[M-H]-	6-O-Acetylarbutin	Phenolic acids	10338-88-2	-	65051.9	123453	105563	11503.7	37337.3	17525.5	64234.5	83266.1	54564.3
Zmhn001793	341.09	179.03	342.095	C15H18O9	[M-H]-	6-O-Caffeoyl-D-glucose	Phenolic acids	-	-	5.04127e+06	1.81491e+06	1.58376e+06	844927	308102	268015	1.25137e+06	1.25669e+06	1.17594e+06
Lman003972	433.11	161.03	434.121	C21H22O10	[M-H]-	6-O-Caffeoylarbutin	Phenolic acids	136172-60-6	-	48207	28381	19676.7	18340	19032.3	21068.8	32843.4	17170.6	23482.3
Zmhn002334	355.1	193.05	356.111	C16H20O9	[M-H]-	6-O-Feruloyl-β-D-glucose	Phenolic acids	137887-25-3	-	6.23389e+06	8.70969e+06	1.54856e+06	142431	72939.8	128788	2.92954e+06	3.14432e+06	2.56883e+06
Lmfn000604	331.07	169.01	332.074	C13H16O10	[M-H]-	6-O-Galloyl-β-D-glucose*	Phenolic acids	13186-19-1	-	312191	283581	518957	291731	405198	308435	312650	277112	256395
Lmfn003035	325.09	145.03	326.1	C15H18O8	[M-H]-	6-O-p-Coumaroyl-β-D-glucose*	Phenolic acids	114297-65-3	-	2.26283e+07	3.68381e+06	7.34434e+07	8.56738e+06	5.07416e+06	6.06954e+06	2.66489e+07	2.43053e+07	2.34552e+07
zjgp122320	163.04	89.04	162.032	C9H6O3	[M+H]+	6-hydroxycoumarin	Coumarins	6093-68-1	-	19425610	2875415	4414050	1.73386e+06	286960	561110	5142915	4646265	4374525
Lajn004573	479.15	317.11	480.163	C23H28O11	[M-H]-	7,2',4'-Trihydroxy-8,3'-dimethoxyisoflavanglucoside	Other Flavonoids	-	-	45244	41621.1	8.28044e+07	40414.2	27483.5	35441.7	1.69595e+07	1.7079e+07	1.7622e+07
Lagp003663	507.15	345.1	506.142	C24H26O12	[M+H]+	7,3',4'-Trihydroxyquercetin glucoside	Flavones	-	-	42794.5	127789	228520	26675	25667.7	91910.6	56489.4	133400	65905.2
Zmxn004029	585.23	195.07	586.241	C31H38O11	[M-H]-	7,8-Dihydro-Buddlenol B(erythro)	Phenolic acids	-	-	105977	170468	33167.3	7986.52	5044.87	10644.4	53368.4	56380.5	42562.6
Zmxn003874	585.23	537.21	586.241	C31H38O11	[M-H]-	7,8-Dihydro-Buddlenol B(threo)	Phenolic acids	-	-	226859	332969	108134	6327.21	10637.5	25285.8	99289.6	93508.6	92859.6
MWSslk183	255.07	181.07	254.058	C15H10O4	[M+H]+	7,8-Dihydroxy-4-phenylcoumarin	Coumarins	842-01-3	-	78830.2	26103.4	77677.9	24702.3	18588.6	15442.7	42666.1	32622.3	40319.7
Zmhp004065	345.1	330.07	344.09	C18H16O7	[M+H]+	7,8-Dihydroxy-5,6,4'-trimethoxyflavone*	Flavones	-	-	11122.3	11889.1	116794	97360.1	26299.6	20239.3	42385.3	38909.3	39663.6
Zbjp003269	355.15	137.05	354.147	C21H22O5	[M+H]+	7-(3,4-dimethoxyphenyl)-1-(4-hydroxyphenyl)hept-1-ene-3,5-dione*	Phenolic acids	-	-	2.62932e+06	990399	2.27871e+06	109002	72185.8	113880	1.03262e+06	1.00576e+06	1.02623e+06
Hagn003556	387.16	207.1	388.095	C23H16O6	[M-H]-	7-Benzyloxy-5-hydroxy-3',4'-methylenedioxyflavonoid	Flavones	-	-	30010	41632.3	66318.6	15725.1	15259.9	4963.97	24122.1	14831.8	15170.1
Walp004391	309.1	147.04	308.09	C15H16O7	[M+H]+	7-C-Glucosylcoumarin	Coumarins	-	-	928822	358790	914465	155505	100040	41680	360925	475876	424432
Zmpn003044	161.03	133.03	162.032	C9H6O3	[M-H]-	7-Hydroxycoumarin;Umbelliferone	Coumarins	93-35-6	C09315	128767	104417	98293.7	194224	208445	105751	184986	101893	83223.7
Zbdp001892	268.1	136.06	267.09	C16H13NO3	[M+H]+	7-Methoxy-3-[1-(3-pyridyl)methylidene]-4-chromanone	Other Flavonoids	-	-	1.26027e+07	8.73655e+06	1.42632e+07	5.80461e+06	6.54837e+06	7.52477e+06	8.28391e+06	8.23637e+06	8.18998e+06
Lmhn004960	441.08	289.07	442.09	C22H18O10	[M-H]-	7-O-Galloyltricetiflavan	Flavanols	-	-	32320.9	22444.5	29059.6	28612.2	25939.6	26313.2	39982.1	22451.2	26994.2
HX1341	163.04	89.04	162.032	C9H6O3	[M+H]+	7-hydroxy-2H-1-benzopyran-2-one	Coumarins	-	-	2.98838e+06	1.50172e+06	1.83979e+06	1.5978e+06	405331	500058	1.43888e+06	1.32618e+06	1.23012e+06
Hmgn004693	371.11	327.03	372.121	C20H20O7	[M-H]-	8-Hydroxy-α-conidendrin	Lignans	-	-	722847	307083	772248	31130.7	26972.6	59463.9	425639	420913	421865
Lmxp004495	163.04	89.04	162.032	C9H6O3	[M+H]+	8-Hydroxycoumarin	Coumarins	2442-31-1	-	1.4401e+07	2.19809e+06	6.54747e+06	1.26869e+06	279070	447463	4.13398e+06	4.32554e+06	4.11639e+06
MWSHC20110	301.07	286.05	300.063	C16H12O6	[M+H]+	8-Methoxyapigenin*	Flavones	57096-02-3	-	260706	309646	3.45557e+07	164106	19704.4	22922.2	8.55667e+06	8.57338e+06	8.42429e+06
Wbtn007603	299.06	284.03	300.063	C16H12O6	[M-H]-	9,11-dimethoxy-2h-[1,3]dioxolo[4,5-b]xanthen-10-one	Other Flavonoids	-	-	308026	327155	2.75606e+07	242422	26845.3	15302.8	8.88353e+06	9.09692e+06	8.80149e+06
Zbbn005905	339.12	309.08	340.131	C20H20O5	[M-H]-	Abyssinone II	Flavanones	-	-	2.45563e+06	849745	2.71008e+06	194080	173727	392022	1.22521e+06	1.27905e+06	1.27872e+06
mws0051	285.08	242.05	284.068	C16H12O5	[M+H]+	Acacetin	Flavones	480-44-4	C01470	16281.9	7054.98	24219.6	13485.9	11407.3	7423.55	14094.4	12788.9	10709.2
Lacn006274	575.17	371.11	576.184	C28H32O13	[M-H]-	Acetyl Phellatin	Flavanones	-	-	54197.6	132841	216503	15906.6	10540.4	9454.05	59669.7	58262.5	44243.3
Lakn003296	371.1	123.05	372.106	C16H20O10	[M-H]-	Acetyl-2-β-D-glucopyranosyloxy-5-hydroxy-phenylacetic acid	Phenolic acids	-	-	43812.5	25427	8264.75	5236.28	6670	1712.81	18298.8	16675	13240.1
Lasp003707	225.08	119.05	224.069	C11H12O5	[M+H]+	Acropyrone	Phenolic acids	-	-	997196	2.16876e+06	1.03282e+06	646055	2.04625e+06	684185	1.11699e+06	1.17036e+06	1.24146e+06
Haxp004538	625.21	163.04	624.205	C29H36O15	[M+H]+	Acteoside; Verbascoside*	Phenolic acids	61276-17-3	C10501	143922	13624.5	72667.2	15119.2	3786.36	7394.89	38698.3	43998.2	55276.1
Lmqp002761	313.14	151.08	312.136	C19H20O4	[M+H]+	Alnusonol	Phenolic acids	52330-12-8	-	2.07285e+06	976578	1.09138e+06	322392	180338	326713	939033	798784	911616
Lmtn002233	327.11	165.05	328.116	C15H20O8	[M-H]-	Androsin	Phenolic acids	531-28-2	-	528167	2.06275e+06	1.58389e+06	275486	227869	255498	798061	783640	813192
pmb2654	460.15	117.9	461.153	C19H27NO12	[M-H]-	Anthranilate-1-O-Sophoroside	Phenolic acids	-	-	1.81463e+06	1.70546e+06	1.94376e+06	894062	1.2308e+06	1.15978e+06	1.44466e+06	1.47145e+06	1.54688e+06
mws1078	138.06	92.05	137.048	C7H7NO2	[M+H]+	Anthranilic Acid	Phenolic acids	118-92-3	C00108	197564	102564	205924	66258.9	64586.6	60362.9	81301.3	112548	87364.5
MWS20148	433.11	271.07	432.106	C21H20O10	[M+H]+	Apigenin-4'-O-glucoside*	Flavones	20486-34-4	-	122879	216019	1.74193e+06	175066	89496.1	71754.1	407616	334598	341116
mws0072	433.11	271.06	432.106	C21H20O10	[M+H]+	Apigenin-5-O-glucoside	Flavones	28757-27-9	-	54016.2	62906.6	62901.3	54023.5	16675	41680	41458.6	59407.9	60020
Lmtp002942	535.14	499.12	534.137	C25H26O13	[M+H]+	Apigenin-6,8-di-C-arabinoside*	Flavones	-	-	55015	126351	673989	107185	125420	196982	229030	177153	196284
pmp000240	609.14	489.1	608.138	C27H28O16	[M+H]+	Apigenin-6-C-(2''-glucuronyl)glucoside	Flavones	-	-	42417.9	13982.4	20005	22496.8	21785.3	36881.6	36455.4	35407.5	17198.4
pmp000237	579.13	283.06	578.127	C26H26O15	[M+H]+	Apigenin-6-C-(2''-glucuronyl)xyloside	Flavones	-	-	51254.8	88365	39343.1	58406.2	68224.2	58586.7	70604.1	51883.2	44581.2
Lmtp002822	535.14	499.12	534.137	C25H26O13	[M+H]+	Apigenin-6-C-arabinoside-8-C-xyloside*	Flavones	-	-	176036	187866	831522	116180	102722	254253	248166	238469	253344
mws1434	431.1	311.05	432.106	C21H20O10	[M-H]-	Apigenin-6-C-glucoside (Isovitexin)*	Flavones	38953-85-4	C01714	257353	476798	457896	809884	761060	473105	576332	320481	361338
Hmqp003435	651.15	271.06	650.148	C29H30O17	[M+H]+	Apigenin-7-O-(2''-O-apiosyl)(6''-Malonyl)glucoside	Flavones	-	C05622	21766	63067.7	115359	30223.4	16505.2	18449.1	40638	19576.3	37028.3
pmf0472	565.16	271.06	564.148	C26H28O14	[M+H]+	Apigenin-7-O-(2''-apiosyl)glucoside (Apiin)	Flavones	26544-34-3	C04858	20788.3	160409	311054	55015	12452.5	13340	132127	105198	86577.7
Lmpp003930	579.15	271.06	578.142	C30H26O12	[M+H]+	Apigenin-7-O-(6''-p-Coumaryl)glucoside	Flavones	-	-	112436	87196.2	162699	117622	123169	55614.8	161177	89413.6	79277.5
Wajp004095	595.17	271.06	594.159	C27H30O15	[M+H]+	Apigenin-7-O-Gentiobioside	Flavones	-	-	26794.7	25917.4	41602	77743.6	52951.3	27075.1	71904.9	33340	45010
MWSHY0189	433.11	271.07	432.106	C21H20O10	[M+H]+	Apigenin-7-O-glucoside(Cosmosiin)*	Flavones	578-74-5	C04608	76919.6	224603	1.77083e+06	167174	80329.9	98370	343989	350406	325990
MWSHY0031	447.09	271.06	446.085	C21H18O11	[M+H]+	Apigenin-7-O-glucuronide*	Flavones	29741-09-1	-	613918	481499	2.37084e+06	564052	75528.8	334056	701090	667490	690906
mws0047	579.17	271.06	578.164	C27H30O14	[M+H]+	Apigenin-7-O-neohesperidoside (Rhoifolin)	Flavones	17306-46-6	C12627	102048	85824.5	175521	61685	76342.3	46206.4	46680	52825.1	44377.3
pmb0681	403.1	367.08	402.095	C20H18O9	[M+H]+	Apigenin-8-C-Arabinoside	Flavones	-	-	48019.7	80814.6	100799	103028	108349	51680	67458.3	42044.4	70020
Zbsn004665	431.1	311.05	432.106	C21H20O10	[M-H]-	Apigenin-8-C-Glucoside (Vitexin)*	Flavones	3681-93-4	C01460	292529	521391	517155	756641	744635	449399	629423	382954	415095
MWS20151	271.06	153.02	270.053	C15H10O5	[M+H]+	Apigenin; 4',5,7-Trihydroxyflavone*	Flavones	520-36-5	C01477	22424.2	53043.4	246190	27448	22498.1	25750.6	53854	59954.7	60392.6
Lmhn004976	299.06	284.02	300.063	C16H12O6	[M-H]-	Aracarpene 2	Isoflavones	-	-	307748	327416	2.53176e+07	227544	20366.5	27182.4	8.5228e+06	8.76838e+06	8.52286e+06
MWSmce675	271.08	108.02	272.09	C12H16O7	[M-H]-	Arbutin	Phenolic acids	497-76-7	C06186	9738.21	8675.18	104254	8296.5	7212.14	9718.97	27777.6	28700.8	25330.2
Lafp006517	373.17	137.06	372.157	C21H24O6	[M+H]+	Arctigenin	Lignans	7770-78-7	C10545	447332	198409	150577	18984	21374	51404.6	134921	142183	132693
mws0092	533.203	371.146	534.21	C27H34O11	[M-H]-	Arctiin	Lignans	20362-31-6	C16915	78576.7	19586.5	216834	57056.2	48073.5	27340.7	100831	91050.2	104740
Qaxp004683	519.17	177.06	518.164	C22H30O14	[M+H]+	Arillatose B	Phenolic acids	137941-45-8	-	439933	462094	225030	6049.03	9935.82	18980.4	237840	184402	173959
Lmtn002796	449.11	287.06	450.116	C21H22O11	[M-H]-	Aromadendrin-7-O-glucoside	Flavanonols	28189-90-4	-	201667	185536	255428	212721	197169	127665	253172	118600	138512
Ybnn006457	301.069	151.003	302.079	C16H14O6	[M-H]-	Artocarpanone	Flavanones	-	-	6581.48	1558.96	1.6561e+06	6415.03	5900.69	7606.45	730463	791607	700311
MWSprf012	355.12	135.04	354.11	C20H18O6	[M+H]+	Asarinin*	Lignans	133-04-0	-	5.95788e+06	5.55949e+06	4.88065e+06	5.25723e+06	5.15781e+06	4.82545e+06	4.75617e+06	4.99205e+06	5.07171e+06
Qmzp101807	343.15	163.07	342.147	C20H22O5	[M+H]+	Avicennol	Coumarins	56110-68-0	-	176947	184600	170970	165943	167239	222428	166296	208686	169099
pmp000787	347.08	314.04	346.069	C17H14O8	[M+H]+	Axillarin (3,6-Dimethoxyquercetagetin)*	Flavonols	5188-73-8	C10021	3880	2436.84	60274.4	24337.8	14744.6	27695.3	22337.4	26229.4	23647
Lmdp003808	317.07	302.04	316.058	C16H12O7	[M+H]+	Azaleatin (5-O-Methylquercetin)	Flavonols	529-51-1	C10022	536119	290079	1.04973e+06	25005	14774.4	13340	344924	346337	366861
mws0052	447.09	271.06	446.085	C21H18O11	[M+H]+	Baicalin*	Flavones	21967-41-9	C10025	554106	510522	2.62285e+06	560400	109372	385604	657275	682232	698279
Lhqp101816	187.04	131.05	186.032	C11H6O3	[M+H]+	Bakuchicin*	Coumarins	-	-	93950.4	50787	93973.1	44327.4	75380.6	44044	77375.7	53260	46929.6
Yxxp005044	357.13	137.06	356.126	C20H20O6	[M+H]+	Balanophonin	Lignans	118916-57-7	-	2.7609e+07	9.21212e+06	2.48701e+07	986976	750437	1.60568e+06	1.04608e+07	1.0373e+07	9.88604e+06
Lssp210086	373.13	137.06	372.121	C20H20O7	[M+H]+	Balanophonin B	Lignans	92216-41-6	-	1.80907e+06	567800	1.8618e+06	479109	332008	526802	1.19388e+06	1.24205e+06	1.28037e+06
Labn003503	563.2	269.1	564.205	C24H36O15	[M-H]-	Benzyl alcohol β-D-glucopyranosyl-(1→2)-[β-D-xylopyranosyl-(1→6)]-β-D-glucopyranoside	Phenolic acids	-	-	78250.2	1496.99	40547.3	63678.8	871.707	13991.5	23982.3	23528.9	30589.9
Hmln003529	401.15	269.11	402.153	C18H26O10	[M-H]-	Benzyl β-primeveroside	Phenolic acids	130622-31-0	-	933526	73215.6	567446	398090	60490.3	325941	433471	422823	432293
Lmtn002324	431.15	269.1	432.163	C19H28O11	[M-H]-	Benzyl-(2''-O-glucosyl)glucoside*	Phenolic acids	-	C17564	600848	328324	276763	1.14305e+06	1.13037e+06	729420	693655	668487	644930
Cmjn004337	401.14	269.1	402.153	C18H26O10	[M-H]-	Benzyl-(2''-O-xylosyl)glucoside	Phenolic acids	-	-	995486	94203.6	535898	399222	41640.1	339329	458248	435003	437235
Lmyn003028	431.16	269.1	432.163	C19H28O11	[M-H]-	Benzyl-β-gentiobioside*	Phenolic acids	56775-64-5	-	620400	782029	124871	1.16875e+06	1.16572e+06	577426	659970	657928	684409
Sazp004372	371.15	167.07	370.142	C21H22O6	[M+H]+	Bursehernin	Lignans	-	-	992876	855162	231838	85378.7	448078	191606	385433	425626	420630
HJN090	433.11	271.06	434.121	C21H22O10	[M-H]-	Butin-7-O-glucoside*	Flavanones	-	-	26289	14655.9	158120	10666.5	8171.86	13340	32707.2	38238.6	33704.9
MWSmce341	279.16	149.03	278.152	C16H22O4	[M+H]+	Butyl isobutyl phthalate	Phenolic acids	17851-53-5	-	5.9603e+07	6.14574e+07	5.8221e+07	5.7074e+07	6.58e+07	6.71791e+07	6.27962e+07	7.39184e+07	7.2688e+07
pmp000025	335.11	231.03	334.105	C17H18O7	[M+H]+	Byakangelicin	Coumarins	482-25-7	C09141	61234	16505.1	102928	20075.7	64993.6	17311.6	50733.3	44365.1	45099.9
Lazn002744	211.06	148.02	212.069	C10H12O5	[M-H]-	C-Veratroylglycol	Phenolic acids	168293-10-5	-	318995	134736	1.49505e+06	372098	628877	695532	584596	635379	628452
mws2212	179.03	135.05	180.042	C9H8O4	[M-H]-	Caffeic acid	Phenolic acids	331-39-5	C01197	1.8799e+07	1.32533e+06	2.36632e+07	855593	486657	793825	6.78802e+06	6.62485e+06	5.78614e+06
MWSCX015	165.05	91.05	164.047	C9H8O3	[M+H]+	Caffeic aldehyde	Phenolic acids	141632-15-7	C10945	8807695	1151305	1.92968e+07	1.06089e+06	751985	603092	6.25361e+06	5.87471e+06	6.32385e+06
Zbfn002396	343.1	163.04	344.111	C15H20O9	[M-H]-	Caffeoyl-O-mannitol	Phenolic acids	-	-	2.31817e+06	2.6433e+06	2.71699e+06	2.79948e+06	2.903e+06	2.284e+06	2.3338e+06	2.25808e+06	2.16201e+06
Labn003679	327.11	147.05	328.116	C15H20O8	[M-H]-	Caffeyl alcohol 4-O-β-D-glucopyranoside	Phenolic acids	-	-	159101	31032.9	482954	47132.7	31416.9	42178.4	184845	115310	183787
Wbwn006953	337.11	307.06	338.115	C20H18O5	[M-H]-	Cagayanone A	Lignans	-	-	2.77785e+06	2.28066e+06	4.59189e+06	739125	994525	1.78232e+06	2.68995e+06	2.79268e+06	2.72677e+06
Lmmp005689	301.07	258.05	300.063	C16H12O6	[M+H]+	Cajanin	Isoflavones	32884-36-9	C10203	21887.5	27844.3	3.27775e+06	24877.3	2801.11	3061.7	722571	716199	720622
Wbtn007675	285.04	285.04	286.048	C15H10O6	[M-H]-	Calyxanthone	Other Flavonoids	98973-45-6	-	40662	32469.2	437503	38590.1	47087.5	46563.7	133057	122450	120778
pmn001716	447.09	285.04	448.101	C21H20O11	[M-H]-	Carthamone*	Chalcones	86579-00-2	C08598	69963.1	73355	468611	80879.6	78434.1	127028	179737	116836	106932
mws0355	441.08	169.01	442.09	C22H18O10	[M-H]-	Catechin gallate	Flavanols	130405-40-2	-	60760.9	30645.7	44902.1	58585.1	46413.7	28780.3	62096.9	27146.4	42230.1
MWSHY0065	291.09	139.04	290.079	C15H14O6	[M+H]+	Catechin*	Flavanols	154-23-4	C06562	30732.3	22751.1	31675.8	61886.4	45051.4	36022.7	52602.5	29589.6	25328.7
Zmgp005070	523.14	361.09	522.137	C24H26O13	[M+H]+	Centaurein*	Flavones	35595-03-0	-	191243	1.86032e+06	859228	209805	126587	92004.4	666800	560272	579006
mws1714	473.072	149.008	474.08	C22H18O12	[M-H]-	Chicoric Acid	Phenolic acids	70831-56-0	C10437	1.01603e+06	131936	1.05194e+06	412223	167234	217707	528203	573698	505232
Sakn004146	639.2	477.14	640.2	C29H36O16	[M-H]-	Chiritoside B	Phenolic acids	-	-	1.37884e+06	634121	465351	74083.1	33015.6	24924.9	379843	313786	330047
Zmhn001036	433.114	271.062	434.121	C21H22O10	[M-H]-	Choerospondin	Flavanones	81202-36-0	-	56037.4	77678.3	242090	21675	56799.4	45556.6	116549	112687	102856
Zmxp002867	625.17	301.07	624.169	C28H32O16	[M+H]+	Chrysoeriol-5,7-di-O-glucoside	Flavones	-	-	27938	9305.32	794749	7583.82	11670	11670	172276	137149	115840
HJAP026	625.18	463.13	624.169	C28H32O16	[M+H]+	Chrysoeriol-6-C-glucoside-4'-O-glucoside	Flavones	-	-	282994	281340	307176	725180	381341	245547	350860	208811	155821
pmb0703	801.22	445.3	800.216	C38H40O19	[M+H]+	Chrysoeriol-6-C-glucoside-7-O-(6''-feruloyl)glucoside	Flavones	-	-	65052.9	45587.5	123390	89308.7	79579.4	36992	82446.2	42616.2	35280.6
pmb0603	625.18	301.07	624.169	C28H32O16	[M+H]+	Chrysoeriol-7,4'-di-O-glucoside	Flavones	-	-	109593	64438.4	7.06025e+06	35540.2	5168.74	31675	1.13677e+06	1.14742e+06	1.01648e+06
Zbsn005918	503.122	299.058	504.127	C24H24O12	[M-H]-	Chrysoeriol-7-O-(6''-acetyl)glucoside*	Flavones	-	-	24098.7	44090	163174	20607.5	14457	18508.5	40003.5	50288.8	38099
pmb0608	549.12	301.07	548.117	C25H24O14	[M+H]+	Chrysoeriol-7-O-(6''-malonyl)glucoside	Flavones	-	-	186985	136837	1.65828e+06	135844	43980.8	184589	362316	322216	278023
pmb2997	799.194	461.1	800.201	C34H40O22	[M-H]-	Chrysoeriol-7-O-Sophoroside-5-O-glucuronide	Flavones	-	-	218522	18059.8	19813.8	5317.07	10733.2	5005	55298.5	51703.4	26802.5
Zmxp004480	625.18	301.07	624.169	C28H32O16	[M+H]+	Chrysoeriol-7-O-gentiobioside	Flavones	-	-	139528	68232	5.76632e+06	24649.9	6670	18347	1.0709e+06	941316	975439
pmb3012	461.11	299.06	462.116	C22H22O11	[M-H]-	Chrysoeriol-7-O-glucoside	Flavones	19993-32-9	-	106402	151723	503347	75645.9	39306.7	153027	144112	185687	154019
pmb0606	477.1	301.07	476.096	C22H20O12	[M+H]+	Chrysoeriol-7-O-glucuronide*	Flavones	-	-	53659.4	33650.4	1.52639e+06	47283	16831.9	28184.5	232651	273420	219246
Zmpn002553	339.07	177.02	340.079	C15H16O9	[M-H]-	Cichoriin*	Coumarins	531-58-8	C09206	537989	447600	610692	564385	520781	333689	684576	339623	319115
pmn001553	315.11	153.06	316.116	C14H20O8	[M-H]-	Cimidahurinine*	Phenolic acids	142542-89-0	-	1.35909e+06	973952	2.01248e+06	1.22158e+06	980156	532852	1.02589e+06	909592	861037
MWS20194	149.06	103.06	148.052	C9H8O2	[M+H]+	Cinnamic acid	Phenolic acids	140-10-3	C00423	313136	147514	423199	58369.3	147737	156008	254013	237408	230682
Lmjn005592	343.08	313.04	344.09	C18H16O7	[M-H]-	Cirsilineol (4',5-Dihydroxy-3',6,7-trimethoxyflavone)	Flavanones	41365-32-6	C10032	10319.5	4892.77	56709.5	27423.4	12527	7381.56	16312.2	15591.3	16531.9
Lmjp005016	331.08	298.05	330.074	C17H14O7	[M+H]+	Cirsiliol (3',4',5-Trihydroxy-6,7-Dimethoxyflavone)	Flavanones	34334-69-5	C10033	27467.9	9737.81	1.19636e+07	9603.05	5785.47	6783.34	3.35882e+06	3.38146e+06	3.33727e+06
Lmnp002616	655.19	493.14	654.18	C29H34O17	[M+H]+	Cirsiliol-8-C-(2''-glucosyl)glucoside	Flavones	-	-	39729.1	66051.7	1.12254e+06	22173.8	39235.5	10005	246885	318695	283620
MWSmce415	315.09	282.06	314.079	C17H14O6	[M+H]+	Cirsimaritin (4',5-dihydroxy-6,7-dimethoxyflavone)*	Flavones	6601-62-3	C17785	15183.9	10894.5	36504	9233.81	6838.69	2491.04	9955.87	8932.7	8161.54
Zbnp010162	353.14	203.03	352.13	C21H20O5	[M+H]+	Citrunobin	Chalcones	126026-23-1	-	536356	439743	411703	355468	270857	241589	278754	295144	276215
mws0906	341.12	179.07	342.132	C16H22O8	[M-H]-	Coniferin	Phenolic acids	531-29-3	C00761	2.4023e+06	4.15361e+06	6.21227e+06	1.67091e+06	544353	559779	2.34496e+06	2.30775e+06	2.25562e+06
mws0093	179.07	146.04	180.079	C10H12O3	[M-H]-	Coniferyl alcohol	Phenolic acids	458-35-5	C00590	479678	175070	523318	72875.9	53171.3	42950.9	269876	261890	257868
MWSmce139	269.04	241.05	268.037	C15H8O5	[M+H]+	Coumestrol	Coumarins	479-13-0	C10205	125885	74666.1	96786.3	102047	89131.7	101435	83790.6	79439.3	67993.3
mws2108	353.09	191.06	354.095	C16H18O9	[M-H]-	Cryptochlorogenic acid (4-O-Caffeoylquinic acid)	Phenolic acids	905-99-7	-	215329	114299	403816	132774	126718	94138.7	220108	148323	114353
Zmdn006722	355.12	219.067	356.126	C20H20O6	[M-H]-	Cubebin	Lignans	18423-69-3	C10549	110500	78976.5	82233.3	29286.1	44127.5	78903.7	91972.1	92706.4	103513
Zmdn003480	537.2	375.15	538.205	C26H34O12	[M-H]-	Cycloolivil-6-O-glucoside	Lignans	-	-	2.16064e+06	3.00363e+06	648854	781878	594058	183664	1.06473e+06	1.04795e+06	1.06066e+06
Lmzn001983	375.13	135.05	376.137	C16H24O10	[M-H]-	D-Threo-guaiacylglycerol-7-O-β-D-glucoside	Phenolic acids	-	-	25940.1	45192.2	32962.6	43455.5	52811.7	42328.5	30595.2	42793.1	48840.4
pmp000417	417.12	255.07	416.111	C21H20O9	[M+H]+	Daidzein-4'-O-glucoside	Isoflavones	-	-	174475	156510	202925	481782	336139	156742	259900	117518	119798
mws1074	177.02	121.03	178.027	C9H6O4	[M-H]-	Daphnetin	Coumarins	486-35-1	C03093	61563.5	22883.8	58728.2	15054.8	20005	25885.5	102105	39898	95298.1
Cmyn001328	339.07	177.02	340.079	C15H16O9	[M-H]-	Daphnin*	Coumarins	486-55-5	C01421	556539	448333	616332	638077	547210	377131	659983	311488	320319
Lmsp004450	359.15	131.05	358.142	C20H22O6	[M+H]+	Dehydrodiconiferyl alcohol	Lignans	4263-87-0	-	831860	586682	564976	131798	163140	110439	419426	403328	466893
Cmsp003083	521.2	131.05	520.194	C26H32O11	[M+H]+	Dehydrodiconiferyl alcohol-4-O-glucoside*	Lignans	107870-88-2	-	203964	205172	267973	388007	829979	84301.8	233936	286928	242811
Lmsp003655	521.2	131.05	520.194	C26H32O11	[M+H]+	Dehydrodiconiferyl alcohol-gamma'-O-glucoside*	Lignans	-	-	151551	213869	211738	347625	861480	105464	276878	254426	248031
Jmwn006041	519.19	357.13	520.194	C26H32O11	[M-H]-	Dehydrodiconiferylalcohol-9'-O-glucoside	Lignans	-	-	270544	1.01945e+06	963059	154968	161637	37486.6	573828	632882	570228
pme1398	465.1	303.05	465.103	C21H21O12+	[M]+	Delphinidin-3-O-glucoside (Mirtillin)	Anthocyanidins	50986-17-9	C12138	135495	32664.8	145126	193822	406121	140138	173058	171666	157003
Lmpp003296	479.08	303.05	479.082	C21H19O13+	[M]+	Delphinidin-3-O-glucuronide	Anthocyanidins	-	-	257497	258669	290565	40518.3	15005	236870	158685	162068	105586
Wagp007602	331.08	316.09	330.074	C17H14O7	[M+H]+	Demethoxysudachitin*	Flavones	4323-80-2	-	33748	12187	1.77537e+07	13044.4	3036.3	3290	4.66504e+06	4.75927e+06	4.84798e+06
Hmsn002272	327.11	165.05	328.116	C15H20O8	[M-H]-	Demethyl coniferin	Phenolic acids	-	-	303018	145311	405868	7784.58	13152.1	24815.3	144078	120013	122237
Lmyn006453	329.14	175.08	330.147	C19H22O5	[M-H]-	Demethyl-Anhydrosecoisolariciresinol	Lignans	-	-	130618	42096.7	198873	34634.4	7107.88	19538	81432.7	89200.7	82313.2
Wagp006264	551.18	389.12	550.169	C26H30O13	[M+H]+	Demethylnobiletin 5-O-Glucoside	Flavones	-	-	44910.8	38829.4	874987	16285.2	35075.2	398547	280835	344180	306109
pmn001573	461.145	299.09	462.153	C23H26O10	[M-H]-	Desmethylagrimonolide-6-O-glucoside	Phenolic acids	1257408-55-1	-	5102.29	9336.18	11963.6	10208.2	7981.7	5661.09	10517.6	10372.1	8786.18
Lmmn005696	243.1	228.08	244.11	C15H16O3	[M-H]-	Desoxyhemigossypol	Phenolic acids	57765-65-8	-	3201.66	4563.87	1941.77	2464.11	3993.38	2693.65	2363.53	3245.83	2327.35
Lmcp101902	479.16	163.04	478.147	C23H26O11	[M+H]+	Desrhamnosylacteoside	Phenolic acids	-	-	517936	86098.1	236086	78360	6670	35010	218489	146520	144062
Lmcp101903	479.16	163.04	478.147	C23H26O11	[M+H]+	Desrhamnosylisoacteoside	Phenolic acids	-	-	489840	220175	240189	42008.8	18017.7	18214.1	189688	203703	169746
Lcyn000106	551.18	193.05	552.184	C26H32O13	[M-H]-	Dichotomoside A	Lignans	-	-	556628	1.0869e+06	660644	1.1527e+06	5.00305e+06	431306	1.25213e+06	1.23695e+06	1.29981e+06
MWSmce232	337.06	163.04	336.063	C19H12O6	[M+H]+	Dicumarol	Coumarins	66-76-2	C00796	9.09763e+06	8.81646e+06	7.6806e+06	7.95436e+06	7.83698e+06	7191880	7.46299e+06	7.74101e+06	7.72953e+06
Lmlp001436	183.07	165.06	182.058	C9H10O4	[M+H]+	Dihydrocaffeic acid	Phenolic acids	1078-61-1	C10447	397505	1.69101e+06	533366	901399	571151	889125	751713	699356	697830
Lmmn000774	343.1	181.05	344.111	C15H20O9	[M-H]-	Dihydrocaffeoylglucose*	Phenolic acids	-	-	103710	157165	250381	152766	169574	127243	149122	140442	155551
HJN055	435.13	273.08	436.137	C21H24O10	[M-H]-	Dihydrocharcone-4'-O-glucoside*	Chalcones	-	-	22112.3	15005	242396	32124.4	42954.5	56731.9	84698.8	83495.6	73650.4
Lmyn003971	521.2	359.15	522.21	C26H34O11	[M-H]-	Dihydrodehydrodiconiferyl alcohol-4-O-glucoside*	Lignans	-	-	674678	1.24118e+06	866966	224322	311504	128360	583224	528046	601028
MWS20182	195.07	136.05	196.074	C10H12O4	[M-H]-	Dihydroferulic Acid	Phenolic acids	1135-23-5	-	425188	113151	767426	160626	114569	133483	315747	245677	307797
Wafn002827	357.12	195.07	358.126	C16H22O9	[M-H]-	Dihydroferulic acid glucoside	Phenolic acids	-	-	226808	795634	597903	143104	108441	98842.8	362099	405370	361263
Cmsp004086	303.09	229.08	302.079	C16H14O6	[M+H]+	Dihydrokaempferide	Flavanonols	137225-59-3	-	137837	114240	83263.6	156720	88564.1	58350	61405.7	31044.6	46948.4
Lmlp005236	451.12	289.08	450.116	C21H22O11	[M+H]+	Dihydrokaempferol-3-O-glucoside*	Flavanonols	31049-08-8	-	423834	252311	762257	397645	268125	210329	253551	294020	270693
Lmmn004625	449.11	287.06	450.116	C21H22O11	[M-H]-	Dihydrokaempferol-7-O-glucoside	Flavanonols	-	-	61270.6	159875	445739	21574.4	57786.9	71868.1	195648	190281	186925
HJAP057	315.09	282.06	314.079	C17H14O6	[M+H]+	Dihydroxy-dimethoxyflavone*	Flavones	-	-	8852.94	12337.2	30283.7	12472.2	5638.94	3619.22	10354.5	10946.1	12790.6
Lmxp011770	279.16	149.02	278.152	C16H22O4	[M+H]+	Diisobutyl phthalate	Phenolic acids	84-69-5	C15205	7.7588e+07	8.47509e+07	9.9568e+07	7.59988e+07	8.48082e+07	8.10686e+07	8.2259e+07	9.03166e+07	1.00499e+08
Lhjp120709	235.1	175.07	234.089	C13H14O4	[M+H]+	Dimethyllimettin	Coumarins	-	-	2.45524e+06	393685	1.04968e+06	179095	81812.7	173492	770050	900883	754291
Lmzp006972	387.18	151.08	386.173	C22H26O6	[M+H]+	Dimethylmatairesinol	Lignans	25488-59-9	-	220734	74706.3	348729	361972	151746	440325	270808	207005	233327
mws0058	299.06	284.03	300.063	C16H12O6	[M-H]-	Diosmetin (5,7,3'-Trihydroxy-4'-methoxyflavone)*	Flavones	520-34-3	C10038	327876	307937	2.70794e+07	247095	27461.9	20698	8.89711e+06	9.06276e+06	8.56207e+06
pmp000579	463.12	301.07	462.116	C22H22O11	[M+H]+	Diosmetin-7-O-galactoside*	Flavones	-	-	242651	291569	3.14627e+07	294871	125320	153563	5.3384e+06	5.32583e+06	5.30281e+06
Hmmp004965	463.12	301.07	462.116	C22H22O11	[M+H]+	Diosmetin-7-O-glucoside*	Flavones	20126-59-4	-	258372	216425	31966592	313955	203110	160556	5.36878e+06	5.40864e+06	5.26058e+06
pmp000583	477.1	301.07	476.096	C22H20O12	[M+H]+	Diosmetin-7-O-glucuronide*	Flavones	35110-20-4	-	83339.5	37468.8	1.65364e+06	60874	23813.1	29622.7	295813	275053	238611
Wbtp005739	229.05	201.06	228.042	C13H8O4	[M+H]+	Dioxyxanthon	Other Flavonoids	-	-	49163.9	25175.8	176512	70625.2	83117.2	88556.7	78117.3	84057	74793.4
mws1150	785.25	623.22	786.258	C35H46O20	[M-H]-	Echinacoside*	Phenolic acids	82854-37-3	C10450	3.71485e+06	223460	1.41016e+06	79111.2	12401.2	15601.7	707378	653818	660905
Lhjp120701	343.08	283.06	342.074	C18H14O7	[M+H]+	Edgeworic acid	Coumarins	-	-	694439	515108	1.18199e+06	103921	61117.1	187114	503100	507589	572642
Wcdp009119	279.23	81.07	278.225	C18H30O2	[M+H]+	Elaidolinolenic acid	Phenolic acids	28290-79-1	-	3.02786e+07	8.39767e+06	1.85391e+07	4.35272e+06	4.81794e+06	6.72405e+06	1.08906e+07	1.07989e+07	1.09934e+07
MWSmce294	209.11	153.05	208.11	C12H16O3	[M+H]+	Elemicin	Phenolic acids	487-11-6	C10451	85212.3	88514.6	49238.3	31023.5	30542.9	40016.1	45540.3	42930.1	44659.1
Lhqp101806	385.11	223.06	384.106	C17H20O10	[M+H]+	Eleutheroside B1	Coumarins	16845-16-2	-	455721	405055	96849.8	23036.2	35010	35588.8	129422	156445	134115
Hmdn001667	463.05	300.99	464.059	C20H16O13	[M-H]-	Ellagic acid-4-O-glucoside	Tannin	-	-	16484.5	29321.7	2.29783e+06	19303.8	37078.1	6620.74	522679	547088	581048
MWSHY0174	291.09	139.04	290.079	C15H14O6	[M+H]+	Epicatechin*	Flavanols	490-46-0	C09727	74370.8	29688.4	33904.3	52731	57549	49350.8	49343.3	42098	38361.4
MWSHC2016	457.08	169.01	458.085	C22H18O11	[M-H]-	Epigallocatechin-3-O-gallate	Flavanols	989-51-5	C09731	40627.8	11447.3	37632	35536	38962.7	29491.9	35501.7	31921.5	20358.1
MWSHC20189	357.13	151.04	358.142	C20H22O6	[M-H]-	Epipinoresinol*	Lignans	24404-50-0	-	1.014e+08	1.07964e+07	3.24944e+07	2.695e+06	885082	3.30934e+06	2.90495e+07	2.89379e+07	2.78138e+07
Zbnn006442	287.05	135.04	288.063	C15H12O6	[M-H]-	Eriodictyol (5,7,3',4'-Tetrahydroxyflavanone)	Flavanones	552-58-9	C05631	7361.02	3420.73	1.01799e+06	3888.26	501.177	739.102	308961	302944	266127
Zbnp004170	451.12	289.07	450.116	C21H22O11	[M+H]+	Eriodictyol-3'-O-glucoside*	Flavanones	-	-	364828	325974	779498	423312	232526	286764	234991	278687	316357
Hmmn002588	741.21	621.16	742.196	C32H38O20	[M-H]-	Eriodictyol-7-O-(2''-O-rhamnosyl)xyloside-4'-O-glucuronide	Flavanones	-	-	217729	39355.8	87942.3	30715.2	6776.72	16085.7	101177	112074	102534
Lmyn004037	601.12	439.09	602.127	C28H26O15	[M-H]-	Eriodictyol-7-O-(6''-O-galloyl)glucoside	Flavanones	-	-	5268.51	23180.5	28625.1	25141.2	27268.7	19946	19968	16945.3	23528.7
mws0057	451.12	289.07	450.116	C21H22O11	[M+H]+	Eriodictyol-7-O-glucoside*	Flavanones	38965-51-4	-	128157	26675	225421	46830.1	152690	137568	98743.7	123139	70601.5
Lazn003893	375.15	327.12	376.152	C20H24O7	[M-H]-	Erythro-Guaiacylglycerol-β-Coniferyl Ether	Lignans	890317-92-7	-	5.49313e+06	1.05259e+06	2.62202e+06	86561.3	34117.9	143184	1.92957e+06	2.03945e+06	2.00911e+06
Lazn006735	583.22	535.2	584.226	C31H36O11	[M-H]-	Erythro-Guaiacylglycerol-β-O-4'-dehydrodisinapyl Ether	Lignans	613684-55-2	-	133340	138202	79770.2	6927.98	2608	20373.1	70606.1	61380.2	64700.3
Lazn003996	377.16	329.14	378.168	C20H26O7	[M-H]-	Erythro-Guaiacylglycerol-β-dihydroconiferyl Ether	Lignans	135820-77-8	-	42170.8	25809.1	19164	6591.72	3967.96	8531.31	29803.9	16523.8	20551.9
WaYn003112	439.16	195.07	440.168	C21H28O10	[M-H]-	Erythro-Guaiacylglycerol-β-threo-syringylglycerol Ether	Lignans	1313434-74-0	-	648203	1.48013e+06	458810	100169	63942.4	58608.5	494738	521701	519059
mws1013	177.02	133.03	178.027	C9H6O4	[M-H]-	Esculetin (6,7-Dihydroxycoumarin)	Coumarins	305-01-1	C09263	2.51558e+06	236340	2.84539e+06	207392	69666.3	113164	1.01651e+06	1.0777e+06	1.0928e+06
Lmbn001162	339.07	177.02	340.079	C15H16O9	[M-H]-	Esculetin-7-O-glucoside*	Coumarins	-	-	525323	465837	531265	585218	548351	329723	657193	319572	318630
pmb3093	351.072	105.1	352.079	C16H16O9	[M-H]-	Esculetin-7-O-quinic acid	Coumarins	-	-	80186	63556.4	94273.5	105685	87208.1	56994.4	105252	44767.3	54187.9
Lbhp011918	503.14	179.03	502.132	C21H26O14	[M+H]+	Esculin glucoside	Coumarins	-	-	46972.1	66633.8	938132	7787.52	15994.3	15123.4	357410	196204	161572
MWSmce577	207.1	161.06	206.094	C12H14O3	[M+H]+	Ethyl p-methoxycinnamate	Phenolic acids	24393-56-4	-	20861	28168	47968.1	31039	15157.2	20181.6	17884.4	21071.3	19495.6
MWS1830	167.07	121.03	166.063	C9H10O3	[M+H]+	Ethylsalicylate	Phenolic acids	118-61-6	-	262706	235314	286459	379636	325516	53754.4	258209	242890	243265
pmn001371	549.2	387.15	550.205	C27H34O12	[M-H]-	Eucommin A*	Lignans	99633-12-2	C10560	136735	7.77453e+06	155960	50500.8	73061.7	102128	1.13031e+06	1.45881e+06	1.78991e+06
Lhhp120814	165.09	91.05	164.084	C10H12O2	[M+H]+	Eugenol	Phenolic acids	97-53-0	C10453	6857985	936405	1.5431e+07	896694	344746	808965	5.74449e+06	4.8623e+06	4.98387e+06
pmp000006	345.1	330.07	344.09	C18H16O7	[M+H]+	Eupatilin (5,7-Dihydroxy-3',4',6-Trimethoxyflavone)*	Flavones	22368-21-4	C10040	12360.5	9800.22	113288	100092	29477.3	20021.4	39180.3	40369.6	36446.9
pmp000013	507.15	345.09	506.142	C24H26O12	[M+H]+	Eupatilin-7-O-glucoside	Flavones	-	-	60837.7	24797.4	633399	53549.4	42515	74768.1	124606	122458	124283
Lmsp010393	359.11	298.09	358.105	C19H18O7	[M+H]+	Eupatorin-5-methylether (3'-hydroxy-5,6,7,4'-tetramethoxyflavone)	Flavones	21764-09-0	-	7648.69	3212.64	68356.9	23119.4	36396.9	21872.5	24535.1	24663.1	25875.9
MWSHY0054	345.1	312.06	344.09	C18H16O7	[M+H]+	Eupatorin; 3',5-Dihydroxy-4',6,7-Trimethoxyflavone*	Flavones	855-96-9	-	9191.84	9417.42	83356.9	87117	29564.2	20964.6	35485.7	35050.2	30170.7
pmn001501	369.134	204	370.142	C21H22O6	[M-H]-	Fargesin	Lignans	31008-19-2	C16957	600454	198001	1.9715e+06	188984	180965	185205	523685	530090	529594
Lmdn003665	623.2	299.09	624.205	C29H36O15	[M-H]-	Farrerol-5,7-di-O-glucoside	Flavanones	-	-	10926.1	5005	105557	3939.94	6670	3340	20052.3	23269.8	24575.2
mws1212	209.08	177.05	208.074	C11H12O4	[M+H]+	Ferulic acid methyl ester	Phenolic acids	2309-07-1	-	734725	249759	612776	85367.8	41301.8	79367.8	327866	348499	346407
mws0014	193.05	134.04	194.058	C10H10O4	[M-H]-	Ferulic acid*	Phenolic acids	537-98-4	C01494	1.33494e+06	253966	2.1983e+06	69413.3	23846.9	79495.8	715213	813363	737946
Hmmn002544	355.1	193.05	356.111	C16H20O9	[M-H]-	Ferulic acid-4-O-glucoside	Phenolic acids	117405-51-3	-	1.67392e+07	7.2442e+07	4.45723e+07	1.12685e+07	8.88871e+06	7.221e+06	2.7517e+07	2.80198e+07	2.84815e+07
MWSHC2062	355.1	193.05	356.111	C16H20O9	[M-H]-	Ferulic β-glucoside*	Phenolic acids	14364-12-6	-	1.06043e+07	8.67629e+06	6.75641e+06	4.191e+06	2.36148e+06	1.10094e+06	5.94002e+06	5.85366e+06	5.88479e+06
Lmhn003799	501.1	307.05	502.111	C24H22O12	[M-H]-	Feruloylferuloyltartaric acid*	Phenolic acids	-	-	2.69589e+06	420179	6.8474e+06	305983	1.70302e+06	247688	1.88256e+06	1.81081e+06	1.78274e+06
Lmhn003074	309.06	193.05	310.069	C14H14O8	[M-H]-	Feruloylmalic acid	Phenolic acids	-	-	1.14901e+06	59494.8	592774	79553.8	14540	15861.9	213588	166595	132624
Lmhn003801	531.12	337.06	532.122	C25H24O13	[M-H]-	Feruloylsinapoyltartaric acid	Phenolic acids	-	-	1.62067e+07	7.27113e+06	1.28664e+07	834872	5.37913e+06	197531	6.74921e+06	6.48751e+06	6.74614e+06
Lahp004593	493.13	331.08	492.127	C23H24O12	[M+H]+	Flavoyadorinin A*	Flavonols	-	-	359575	243029	4.62689e+07	460629	349048	198462	7.75476e+06	7.25029e+06	7.41607e+06
Wagp010352	359.11	344.09	358.105	C19H18O7	[M+H]+	Flindulatin	Flavones	521-44-8	-	15681.8	12062.4	169167	59632.2	77309.7	42397.8	51478.8	49384.7	50232
Zmdp005767	517.13	269.09	516.127	C25H24O12	[M+H]+	Formononetin-7-O-(6''-Malonyl)glucoside	Isoflavones	-	C16222	67931.8	50593.3	56393.5	116693	85542.3	50327.2	82849.1	37771.4	45779.5
mws1720	623.2	161.03	624.205	C29H36O15	[M-H]-	Forsythiaside A*	Phenolic acids	79916-77-1	-	7.62494e+07	1.16928e+07	4.26082e+07	3.99898e+06	726915	1.51146e+06	2.31611e+07	2.28421e+07	2.04483e+07
Wbmp003302	165.09	91.05	164.084	C10H12O2	[M+H]+	Frambinone	Phenolic acids	-	-	2.95383e+06	611504	8.89601e+06	1.31742e+06	885861	893981	3.1038e+06	2.81113e+06	2.6658e+06
Lmbn001181	531.14	531.13	532.143	C22H28O15	[M-H]-	Fraxetin-7,8-di-O-glucoside	Coumarins	-	-	503221	312842	201222	298379	114940	105800	253332	228105	202654
MWSmce025	369.09	207.03	370.09	C16H18O10	[M-H]-	Fraxetin-8-O-glucoside (Fraxin)	Coumarins	524-30-1	C09266	104676	113786	119420	111939	108488	68770.5	157728	83315.7	64688.8
Salp005796	405.15	167.07	404.147	C21H24O8	[M+H]+	Fraxiresinol	Lignans	89199-97-3	-	327160	139309	83703.8	15807.8	5305.3	19627.8	60843.5	121440	98006
pmn001672	547.17	223.1	548.174	C23H32O15	[M-H]-	Furanofructosyl-α-D-(3-mustard acyl)glucoside*	Phenolic acids	-	-	262479	101767	167754	35765	52466.8	34925.9	116307	94091.3	113473
pmn001671	547.17	223.1	548.174	C23H32O15	[M-H]-	Furanofructosyl-α-D-(6-mustard acyl)glucoside*	Phenolic acids	-	-	458079	141680	277524	128305	81766.7	108311	219009	183636	182247
Lmyn006227	269.05	151	270.053	C15H10O5	[M-H]-	Galangin (3,5,7-Trihydroxyflavone)	Flavonols	548-83-4	C10044	21036.2	60225.3	292228	40999.7	4799.35	12789.5	81363.9	85179.3	89180.5
Lmlp005572	433.11	271.06	432.106	C21H20O10	[M+H]+	Galangin-7-O-glucoside	Flavonols	-	-	70111.2	163168	1.72574e+06	157975	95850.3	65275.7	362522	327978	355264
Hmbp001276	169.05	65.03	168.042	C8H8O4	[M+H]+	Gallacetophenone	Phenolic acids	528-21-2	-	8.23594e+06	1.74574e+07	1.19903e+07	8.80792e+06	1.00732e+07	1.12679e+07	1.13162e+07	1.06749e+07	1.14593e+07
mws0024	169.01	125.02	170.022	C7H6O5	[M-H]-	Gallic acid	Phenolic acids	149-91-7	C01424	255250	226242	245368	325323	53039.7	167296	280677	203055	220749
mws2220	457.08	169.01	458.085	C22H18O11	[M-H]-	Gallocatechin 3-O-gallate	Flavanols	5127-64-0	-	37289.8	14433.9	22010.3	36740.8	34787.2	32512.8	25298.2	19915.4	20359.9
Wagp006311	607.17	359.11	606.159	C28H30O15	[M+H]+	Gardenin B 5-(6''-Malonyl)Glucoside	Flavones	-	-	784730	200914	525575	22013.9	10604.2	3340	259772	255564	188484
Wagp005210	521.16	359.11	520.158	C25H28O12	[M+H]+	Gardenin B 5-glucoside*	Flavones	-	-	2.16204e+06	1.03716e+06	3.94241e+06	55529.5	81517.5	193294	1.24814e+06	1.46262e+06	1.14466e+06
Lssp210422	271.06	153.02	270.053	C15H10O5	[M+H]+	Genistein*	Isoflavones	446-72-0	C06563	20879.6	46426.2	242889	34115	19062	18913.9	62605.9	57043.4	42276.1
Lmgp004731	433.11	271.06	432.106	C21H20O10	[M+H]+	Genistein-7-O-galactoside*	Isoflavones	-	-	84089.4	141502	1.43051e+06	146215	126730	39986.5	294218	301808	377358
WaYn005157	491.118	315.072	492.127	C23H24O12	[M-H]-	Gentisic acid 2-O-(6''-O-Feruloyl)Glucoside	Phenolic acids	-	-	70983.7	55407.4	134742	15871.9	22475.6	89889.2	62157.1	62940.2	57524.8
Xmyn004302	449.24	259.063	450.21	C20H34O11	[M-H]-	Ginkgoside A	Phenolic acids	-	-	176603	172899	185072	214507	194762	96343.3	249577	130493	126629
Zmgn006415	321.11	306.09	322.12	C20H18O4	[M-H]-	Glabrene	Other Flavonoids	60008-03-9	-	49018.7	345583	318842	22861.8	224836	434888	207952	201372	199098
Lamn005190	625.22	301.11	626.222	C29H38O15	[M-H]-	Glucosyl isomucronulatol-7-O-glucoside	Other Flavonoids	-	-	13028.8	32308.5	3.11515e+06	12126.9	6670	14171.1	571150	584534	600310
Lahp003997	655.19	331.08	654.18	C29H34O17	[M+H]+	Glucosyl-rhamnazin-3-O-β-D-glucoside*	Flavonols	-	-	27767.3	10453.1	7.82348e+06	9874.93	18226.3	1670	1.44132e+06	1.18026e+06	1.32837e+06
Lacp004439	681.24	357.14	680.232	C32H40O16	[M+H]+	GlucosylPhellamurin	Flavanonols	-	-	443094	432079	135074	46821.3	69511.3	8340	154706	224081	172787
Lacp003978	697.23	373.13	696.226	C32H40O17	[M+H]+	GlucosylPhellatin	Flavonols	-	-	30010	125335	39263.8	10005	5005	16675	28581.2	24458.5	36616.4
Hmtn001302	299.08	137.02	300.084	C13H16O8	[M-H]-	Glucosyloxybenzoic acid*	Phenolic acids	-	-	1.75069e+06	2.16735e+06	5.23473e+06	406082	572399	1.11308e+06	2.04741e+06	1.90685e+06	2.00585e+06
MWSHC2022	359.1	197.05	360.106	C15H20O10	[M-H]-	Glucosyringic acid	Phenolic acids	33228-65-8	-	7.91761e+06	8.61889e+06	3.41417e+06	3.00769e+06	8.98303e+06	4.621e+06	5.36281e+06	5.29254e+06	5.43019e+06
MWSprf147	315.11	153.16	314.1	C14H18O8	[M+H]+	Glucovanillin	Phenolic acids	494-08-6	C19808	204963	274881	199803	70962.1	56109.4	40027.9	138859	156022	141071
Xmyn008071	299.06	284.03	300.063	C16H12O6	[M-H]-	Gnetifolin B*	Flavones	140671-06-3	-	324581	338137	2.57888e+07	229264	19462.8	27116	8.73903e+06	8.69956e+06	8.57882e+06
Lmmp001947	481.1	319.05	480.09	C21H20O13	[M+H]+	Gossypetin-3-O-glucoside*	Flavonols	-	-	365224	303264	384266	126280	107815	346695	190878	212965	257350
Zmhp004034	465.1	303.05	464.096	C21H20O12	[M+H]+	Gossypetin-7-O-rhamnoside; Rhodiolgin	Flavonols	94696-39-6	-	127501	143410	347589	171137	117765	118851	205765	145366	162249
Lmmp003271	481.1	319.05	480.09	C21H20O13	[M+H]+	Gossypetin-8-O-glucoside	Flavonols	652-78-8	C10051	40010	90267.8	3587993	41900.3	29997.7	50753.8	1237020	828143	879400
WaYn003084	525.16	167.03	526.169	C24H30O13	[M-H]-	Guaiacylglycerol 8-O-(1''-O-Glucosyl)Vanillic Acid Ether	Phenolic acids	-	-	10091.5	23682	20450	11866.9	110637	7924.66	31963.4	28199.1	29195.9
Lazn002951	319.12	241.05	320.126	C17H20O6	[M-H]-	Guaiacylglycerol-β-Guaiacyl Ether	Lignans	7382-59-4	-	38688.1	53324.3	330618	47535.8	55955.6	76284.7	112427	109533	133105
mws1326	301.035	211.04	302.043	C15H10O7	[M-H]-	Herbacetin	Flavonols	527-95-7	C02806	13178.1	30722.7	115514	1296.42	530.424	2577.41	40924.6	40883.4	45748.3
Lmqp003647	479.08	303.05	478.075	C21H18O13	[M+H]+	Herbacetin-3-O-glucuronide*	Flavonols	-	-	231734	299225	250423	33840.1	7102.21	144131	149662	101548	89084.1
mws0463	301.07	164.01	302.079	C16H14O6	[M-H]-	Hesperetin	Flavanones	520-33-2	C01709	30837.7	7780.08	4.40855e+06	12719.9	2950.89	3869.52	1.81114e+06	1.85713e+06	1.82247e+06
Zbhp004510	465.14	303.09	464.132	C22H24O11	[M+H]+	Hesperetin-3'-O-glucoside*	Flavanones	-	-	111697	198713	690550	232211	207805	115050	308559	98370	258383
pmb2970	625.18	565.3	626.185	C28H34O16	[M-H]-	Hesperetin-5,7-di-O-glucoside	Flavanones	-	-	107148	122270	166563	116993	126783	94309.6	110906	112392	142526
pme1598	463.12	301.07	464.132	C22H24O11	[M-H]-	Hesperetin-5-O-glucoside	Flavanones	69651-80-5	-	314407	469069	5.69483e+06	419989	376017	272843	1.44102e+06	1.38623e+06	1.18528e+06
Lmzp002365	465.14	303.09	464.132	C22H24O11	[M+H]+	Hesperetin-7-O-glucoside*	Flavanones	31712-49-9	C16422	74362.7	61606.5	3.03604e+06	112803	59692.1	75541.7	893479	805016	818973
mws0036	609.18	301.09	610.19	C28H34O15	[M-H]-	Hesperetin-7-O-rutinoside (Hesperidin)	Flavanones	520-26-3	C09755	76274.2	64908	79413.2	140357	136314	108358	129403	70596	80839.2
Qmzp101823	355.12	135.04	354.11	C20H18O6	[M+H]+	Hinokinin*	Lignans	26543-89-5	-	4.8151e+06	4.82794e+06	4.15159e+06	3.49241e+06	4.351e+06	4.16532e+06	4.20516e+06	4.24413e+06	4.42732e+06
Hmgp002189	463.13	301.07	462.116	C22H22O11	[M+H]+	Hispidulin-7-O-glucoside(Homoplantaginin)*	Flavones	17680-84-1	C17762	237506	307663	3.01333e+07	398752	208606	154712	5.44302e+06	5.48463e+06	5.41199e+06
Wahp006589	303.09	153.02	302.079	C16H14O6	[M+H]+	Homeriodictyol	Flavanones	-	-	162143	33024.2	1.94657e+07	75625.5	14333.1	17302.4	7.47763e+06	7.56138e+06	7.67071e+06
mws1033	303.09	153.02	302.079	C16H14O6	[M+H]+	Homoeriodictyol	Flavanones	446-71-9	C09756	130800	44745.8	1.68186e+07	72176.3	13930	16519.5	6.96264e+06	6.93606e+06	6.8205e+06
Wahp004841	465.14	303.09	464.131	C22H24O11	[M+H]+	Homoeriodictyol-7-O-β-O-glucoside*	Flavanones	-	-	75643.2	111569	2.73945e+06	80549.3	75747.7	31117.3	706402	957119	879643
pme1292	167.03	123.05	168.042	C8H8O4	[M-H]-	Homogentisic acid*	Phenolic acids	451-13-8	C00544	866752	2.00753e+06	1.44913e+06	1.14108e+06	1.22516e+06	1.15094e+06	1.28623e+06	1.21459e+06	1.38252e+06
WaYn002313	373.11	193.05	374.121	C16H22O10	[M-H]-	Homosyringic Acid 4'-O-Glucoside	Phenolic acids	-	-	377898	348509	595059	170720	375559	462825	351557	321843	307281
mws0117	181.051	122.037	182.058	C9H10O4	[M-H]-	Homovanillic acid; 4-Hydroxy-3-methoxyphenylacetic acid*	Phenolic acids	306-08-1	C05582	36685.7	11515.9	61231.8	55305	43097	46932.3	37366	43787.9	30391.3
Lhhp102904	357.13	307.09	356.126	C20H20O6	[M+H]+	Horsfieldin*	Lignans	-	-	1.72026e+06	1.73318e+06	5.75591e+06	420258	684371	1.19518e+06	1.90226e+06	2.02455e+06	1.90283e+06
Labn004865	433.11	271.06	434.121	C21H22O10	[M-H]-	Hydroxy isoliquiritigenin glucoside*	Chalcones	-	-	51680	54196.5	428024	32156.2	10788.1	13319.7	103559	119481	100815
Wagp005934	551.17	389.12	550.169	C26H30O13	[M+H]+	Hydroxyauranetin 5-O-Glucoside	Flavones	-	-	50561.5	1.62909e+06	2.08645e+06	15256.7	34985.5	253375	979760	735840	837148
Lamp006225	339.11	177.05	338.1	C16H18O8	[M+H]+	Hydroxymethyl coumarin glucoside	Coumarins	-	-	3.03028e+07	1.32329e+07	3.95971e+06	1.10536e+06	3.46978e+06	537312	7.71115e+06	8.31486e+06	7.7766e+06
MWSmce264	153.06	123.05	154.063	C8H10O3	[M-H]-	Hydroxytyrosol	Phenolic acids	10597-60-1	-	51105.3	42306.8	35525	24770.9	30639.7	27993.8	33482	32170.9	30135.3
Lmbn006032	301.035	149.024	302.043	C15H10O7	[M-H]-	Hypolaetin	Flavones	27696-41-9	C10078	13340	5763.93	1.37756e+06	10357.3	4966.38	3174.44	409404	466019	393194
pmp001164	493.13	316.1	492.127	C23H24O12	[M+H]+	Iristectorin B	Isoflavones	94396-09-5	-	55015	17106.1	4.46696e+06	47636	32225.1	28340	727815	668631	668926
Hmgp001944	625.21	163.03	624.205	C29H36O15	[M+H]+	Isoacteoside*	Phenolic acids	61303-13-7	-	145896	18340	75466.1	14375.2	4510.67	11670	32350.8	44677.4	46355.7
pmn001382	515.12	353.09	516.127	C25H24O12	[M-H]-	Isochlorogenic acid A*	Phenolic acids	2450-53-5	-	40010	921796	548252	18592.3	101626	18515.3	291417	258396	265851
Li512115	515.12	353.09	516.127	C25H24O12	[M-H]-	Isochlorogenic acid B	Phenolic acids	14534-61-3	C10468	532317	1.18169e+06	703892	38037.8	84646.3	236281	425458	433286	378766
pmn001384	515.12	353.09	516.127	C25H24O12	[M-H]-	Isochlorogenic acid C*	Phenolic acids	57378-72-0	-	498895	586381	522630	11670	100040	30399.9	203020	187793	182509
Hmgp002033	623.2	163.03	622.19	C29H34O15	[M+H]+	Isocrenatoside	Phenolic acids	221895-09-6	-	49640.6	10451.7	25667.7	15005	13376.2	8422.59	18831.5	21605.6	26532.5
pme0422	193.051	134.037	194.058	C10H10O4	[M-H]-	Isoferulic Acid*	Phenolic acids	25522-33-2	C10470	1.03459e+06	228493	2.01976e+06	50343.9	18340	44376.7	657930	591339	524298
Hmln003092	623.2	461.16	624.205	C29H36O15	[M-H]-	Isoforsythoside A	Phenolic acids	1357910-26-9	-	3.15156e+07	5.09764e+06	1.69758e+07	1.68176e+06	287172	621141	9.48846e+06	8.60398e+06	8.812e+06
Lmbp002962	209.05	194.02	208.037	C10H8O5	[M+H]+	Isofraxetin	Coumarins	50656-75-2	-	111799	116546	184466	110396	119396	40335.3	85861.8	80737.8	78434.7
Hmgn004139	373.13	329.05	374.137	C20H22O7	[M-H]-	Isohydroxymatairesinol	Lignans	-	-	298340	112866	1.03534e+06	19631.6	55400.2	42846.3	279838	241845	263270
Lhbp111734	361.16	137.06	360.157	C20H24O6	[M+H]+	Isolariciresinol	Lignans	548-29-8	-	1.58147e+06	1.92276e+06	1.12908e+06	128937	183726	171324	1.2267e+06	1.11719e+06	1.2329e+06
Lmmn002274	521.2	359.15	522.21	C26H34O11	[M-H]-	Isolariciresinol-9'-O-glucoside*	Lignans	63358-12-3	-	711805	753074	856036	200809	300971	135555	483940	489034	551683
Wbmn005986	651.23	651.23	652.237	C31H40O15	[M-H]-	Isomartynoside	Phenolic acids	94410-22-7	-	2.49734e+06	4.23325e+06	5.73827e+06	374581	727511	791166	2.55093e+06	2.54997e+06	2.55953e+06
MWSHY0064	625.17	317.07	624.169	C28H32O16	[M+H]+	Isorhamnetin-3-O-neohesperidoside*	Flavonols	55033-90-4	-	55015	36675	83365	55015	55015	16041.4	49472.5	28340	20746.6
Hmcp002207	479.12	317.06	478.111	C22H22O12	[M+H]+	Isorhamnetin-7-O-glucoside (Brassicin)*	Flavonols	6743-96-0	-	43568	50015	8.29961e+07	68355	58028.6	73355	1.50541e+07	1.50069e+07	1.54223e+07
WaYn002949	285.099	89.0245	286.105	C13H18O7	[M-H]-	Isosalicin	Phenolic acids	-	-	16434.5	23927.5	9514.92	20556.6	25069.1	16617.7	14989.3	22864.7	15880.1
mws1292	565.16	409.09	564.148	C26H28O14	[M+H]+	Isoschaftoside	Flavones	52012-29-0	-	394519	303192	399585	593521	501880	258312	391009	212019	193092
Hmbp002730	287.06	153.01	286.048	C15H10O6	[M+H]+	Isoscutellarein*	Flavones	41440-05-5	C10097	6968.22	7711.85	1.31042e+06	9390.35	7110.99	4340.77	552444	537281	545885
Zmdn003762	533.19	311.11	534.195	C23H34O14	[M-H]-	Isosyringinoside	Lignans	152686-85-6	-	49668.7	101660	34781.9	16612.4	8208.1	7031.51	38619.7	38317.9	36474.1
Lmcp003788	479.12	317.06	478.111	C22H22O12	[M+H]+	Isotamarixin*	Flavonols	-	-	9.21656e+06	1.0344e+07	6.81931e+06	2.73707e+06	1396820	8.92873e+06	5.36163e+06	5.57743e+06	5.1602e+06
Lmyp004081	579.17	313.07	578.164	C27H30O14	[M+H]+	Isovitexin-2''-O-rhamnoside	Flavones	-	-	42077.1	53334.1	32446.3	112919	123390	72582.9	83935.5	44595.6	41959.7
Hmgp002238	493.14	331.08	492.127	C23H24O12	[M+H]+	Jaceosidin-7-O-Glucoside*	Flavones	25474-11-7	-	295516	241174	4.34549e+07	392869	362689	210393	7.34738e+06	7.25575e+06	7.0998e+06
Lmhn008988	389.2	329.18	390.204	C22H30O6	[M-H]-	Kadangustin H	Lignans	-	-	433951	79477.6	234287	124482	43560.8	270482	189216	182101	189440
Zbjn005825	503.122	299.057	504.127	C24H24O12	[M-H]-	Kaempferide-3-O-(6'-O-acetyl)glucoside*	Flavonols	-	-	24098.7	44090	163174	20607.5	14457	18508.5	40003.5	50288.8	38099
pmn001637	417.083	285.036	418.09	C20H18O10	[M-H]-	Kaempferol-3-O-arabinoside (Juglanin)	Flavonols	5041-67-8	-	22554.3	190109	18185.1	30496.7	26704.6	21048.6	49096.5	33129.3	29859.6
mws0913	447.09	285.04	448.101	C21H20O11	[M-H]-	Kaempferol-3-O-galactoside (Trifolin)*	Flavonols	23627-87-4	C12626	134988	49441.2	643049	90088.8	125326	101144	204902	164911	159358
mws0919	431.098	285.039	432.106	C21H20O10	[M-H]-	Kaempferol-3-O-rhamnoside (Afzelin)(Kaempferin)	Flavonols	482-39-3	C16911	80173	192827	53692.7	111827	117686	78764.8	117756	68490.6	87858
pme1605	593.15	285.04	594.159	C27H30O15	[M-H]-	Kaempferol-3-O-robinobioside(Biorobin)*	Flavonols	17297-56-2	-	41159.1	32414.3	41026.4	58996.7	38891.6	35636.6	56354.8	21518.8	55912.5
Lmsn002815	593.151	285.041	594.159	C27H30O15	[M-H]-	Kaempferol-3-O-rutinoside(Nicotiflorin)*	Flavonols	17650-84-9	C21833	78015	76508.2	92837.1	119074	185125	48523.8	119438	62088.7	68501.1
HJAP148	581.15	287.06	580.143	C26H28O15	[M+H]+	Kaempferol-3-O-sambubioside	Flavonols	27661-51-4	-	7083.54	21675	1.11567e+06	24160	15005	15248.2	245215	146485	118943
Lmqp003887	581.15	287.05	580.143	C26H28O15	[M+H]+	Kaempferol-3-O-xylosyl(1→2)glucoside	Flavones	-	-	15005	24832.4	1.0134e+06	38345	33575.7	19804.6	183455	206277	155746
Xmyp005654	449.11	287.06	448.101	C21H20O11	[M+H]+	Kaempferol-4'-O-glucoside*	Flavonols	52222-74-9	-	187790	257654	1.14963e+06	277135	121884	89166	354232	190697	261721
mws0089	447.09	285.04	448.101	C21H20O11	[M-H]-	Kaempferol-7-O-glucoside*	Flavonols	16290-07-6	-	169547	226470	522492	140075	180120	112236	146286	114215	110870
pme0321	431.1	285.04	432.106	C21H20O10	[M-H]-	Kaempferol-7-O-rhamnoside	Flavonols	20196-89-8	-	85084.2	219982	67257.7	126848	104118	70664.7	126387	84027.1	85204.2
Lmmn001294	331.1	153.02	332.111	C14H20O9	[M-H]-	Koaburaside*	Phenolic acids	41653-73-0	-	340970	265013	331067	372347	385294	838809	353864	369180	366083
Hmzp006059	301.07	286.05	300.063	C16H12O6	[M+H]+	Ladanetin	Flavones	-	-	384510	80988.5	139660	23262.5	22205.4	35433.9	103427	98647.6	108054
Hmzp004605	463.13	301.08	462.116	C22H22O11	[M+H]+	Ladanetin-6-O-β-D-glucoside*	Flavones	-	-	1.70751e+06	1.82696e+06	8.56815e+06	766391	360382	2.07563e+06	2.05355e+06	2288503	2.03954e+06
Lmnn004130	553.207	505.187	554.215	C30H34O10	[M-H]-	Lappaol C	Lignans	64855-00-1	C17686	166477	407648	188291	5564.03	5750.18	13441.4	160945	150998	152465
HJN083	521.2	359.15	522.21	C26H34O11	[M-H]-	Lariciresinol-4'-O-glucoside	Lignans	143663-00-7	-	601555	775604	939474	243310	182130	165481	548554	516328	559760
mws1003	331.046	151.003	332.053	C16H12O8	[M-H]-	Laricitrin	Flavonols	53472-37-0	C12633	5035.25	15593.2	387200	2805.74	1767.54	10981.4	128781	114853	101586
HJAP005	495.11	333.07	494.106	C22H22O13	[M+H]+	Laricitrin-3-O-glucoside*	Flavonols	39986-90-8	-	130159	430370	1.95983e+06	41680	111245	130065	396698	355335	294891
Wcdn001606	331.1	153.02	332.111	C14H20O9	[M-H]-	Leonuriside A*	Phenolic acids	121748-12-7	-	16136.2	22323.9	11124.1	22928.4	29887.5	55221.1	25789.4	21299.1	17932.7
Hmcp001628	671.18	347.07	670.175	C29H34O18	[M+H]+	Limocitrin-3,7-di-O-glucoside*	Flavones	-	-	345223	90371.4	756912	30089.6	13568.1	11603.1	287692	234730	262916
Hmcp002187	509.13	347.07	508.122	C23H24O13	[M+H]+	Limocitrin-3-O-galactoside*	Flavonols	-	-	161034	97203.8	727420	161533	191936	102043	156760	226850	126559
Hmcp002399	509.13	347.07	508.122	C23H24O13	[M+H]+	Limocitrin-3-O-glucoside	Flavonols	-	-	130033	100606	721850	206192	163168	116331	422440	403313	416149
Hmcp001579	671.18	347.07	670.174	C29H34O18	[M+H]+	Limocitrin-3-O-sophoroside*	Flavonols	-	-	546335	73250	1.03025e+06	50537.3	29754	15284.8	186599	301599	212000
pme0088	285.04	151	286.048	C15H10O6	[M-H]-	Luteolin (5,7,3',4'-Tetrahydroxyflavone)	Flavones	491-70-3	C01514	9541.83	4359.59	1.18109e+06	5903.09	2542.69	608.79	257120	272612	255599
MWS20147	449.11	287.06	448.101	C21H20O11	[M+H]+	Luteolin-3'-O-glucoside	Flavones	5154-41-6	-	54578.2	77930.6	1.12223e+06	65719.1	32722	98153.9	347475	299344	261872
Hmpp003270	449.11	287.05	448.101	C21H20O11	[M+H]+	Luteolin-4'-O-glucoside	Flavones	6920-38-3	-	128395	169508	1531530	178450	115882	155090	225727	307000	244853
mws1608	447.09	357.06	448.101	C21H20O11	[M-H]-	Luteolin-6-C-glucoside (Isoorientin)	Flavones	4261-42-1	C01821	208136	192176	246413	234088	239256	146043	242429	142696	135473
Hmqp003184	667.15	287.06	666.143	C29H30O18	[M+H]+	Luteolin-7-O-(6''-malonyl)glucoside-5-O-arabinoside	Flavones	-	-	41159.4	19845.8	63505.6	45405.7	38242.1	17724.5	57826.9	33350	21535.1
MWSHY0104	449.11	287.06	448.101	C21H20O11	[M+H]+	Luteolin-7-O-glucoside (Cynaroside)*	Flavones	5373-11-5	C03951	232157	200937	1.1634e+06	235062	216255	156199	322399	367145	328921
Wcdn004423	581.22	419.14	582.231	C28H38O13	[M-H]-	Lyoniresinol-3-O-glucoside	Lignans	-	-	70647.2	59014.7	44104.1	62130.1	21733.2	35517.8	40958.8	39951.9	59669.3
Qatp006104	357.17	137.06	356.162	C21H24O5	[M+H]+	Machilin G	Lignans	-	-	3.92326e+06	1.72919e+06	5.59211e+06	416662	577890	949666	2.26147e+06	2.30625e+06	2.33147e+06
Jmzp004026	625.212	163.04	624.205	C29H36O15	[M+H]+	Magnoloside A*	Phenolic acids	113557-95-2	C17678	114372	39357.3	65855	21984.6	5005	9937.45	59020.1	86902.3	76690
Lmpp003611	655.17	331.08	655.166	C32H31O15+	[M]+	Malvidin-3-O-(6''-O-caffeoyl)glucoside	Anthocyanidins	-	-	16675	11670	3.81256e+06	1670	33490.4	7059.53	651864	531282	562074
Lmpp003958	639.17	331.08	639.171	C32H31O14+	[M]+	Malvidin-3-O-(6''-O-p-coumaroyl)glucoside	Anthocyanidins	158189-28-7	-	92668.5	84580.9	137088	144969	111795	156760	118410	75025	75025
Jmzn003632	521.2	329.14	522.21	C26H34O11	[M-H]-	Manglieside D	Lignans	-	-	2.89326e+06	1.27826e+07	3.10623e+06	486656	750369	548559	2.96186e+06	3.30645e+06	3.62593e+06
Lmdn004491	651.23	175.04	652.237	C31H40O15	[M-H]-	Martynoside*	Phenolic acids	67884-12-2	-	1.32685e+06	1.8218e+06	1.69128e+06	68620.9	56219.9	77527	843803	941823	901377
Hmlp003129	359.15	137.06	358.142	C20H22O6	[M+H]+	Matairesinol	Lignans	580-72-3	C10682	1.00984e+07	2.95151e+06	6.45882e+06	129830	65015.6	311505	3.4989e+06	3.49119e+06	3.43394e+06
pmp000682	538.23	359.15	520.194	C26H32O11	[M+NH4]+	Matairesinol-4'-O-glucoside (Matairesinoside)	Lignans	23202-85-9	-	1.37664e+06	6.13543e+06	3.22389e+06	223517	248793	392968	2.03452e+06	1.65578e+06	1.46557e+06
Hmln001931	681.24	357.13	682.247	C32H42O16	[M-H]-	Matairesinol-4,4'-O-diglucoside	Lignans	-	-	1.67625e+07	26759809	6.21914e+06	1.19827e+06	1.64219e+06	761262	9.26526e+06	1.01884e+07	9.462e+06
Lmtn002997	493.1	331.05	494.106	C22H22O13	[M-H]-	Mearnsetin-3-O-glucoside	Flavones	-	-	24443	59368.8	1.75089e+07	33717	10005	18948.7	4.512e+06	4.36225e+06	4.63821e+06
Rfmb056	591.21	387.14	592.216	C29H36O13	[M-H]-	Medioresinol-4'-O-(6'''-acetyl)glucoside	Lignans	-	-	154285	103008	177020	22054.8	29378.9	17961.8	76128.9	59810.5	86013.6
pmn001372	711.25	549.2	712.258	C33H44O17	[M-H]-	Medioresinol-4,4'-di-O-glucoside	Lignans	88142-63-6	-	36430.9	56577.7	46680	5421.61	24799.2	7767.68	35537.5	21251.1	22996
MWSmce680	125.06	110.04	124.052	C7H8O2	[M+H]+	Mequinol	Phenolic acids	150-76-5	-	181847	109453	109455	50774.8	50124.2	143410	71130	92450.1	97255.6
Sazp008178	371.11	135.05	370.105	C20H18O7	[M+H]+	Meridinol	Lignans	-	-	1.58229e+06	787682	943579	2.60887e+06	1.48511e+06	1.35091e+06	1.31054e+06	1.26709e+06	1.32208e+06
Hmtn001288	181.05	135.04	182.058	C9H10O4	[M-H]-	Methyl 2,4-dihydroxyphenylacetate*	Phenolic acids	67828-42-6	-	184002	268371	299652	118912	81690.5	83820	176599	171570	160154
Lmbn004790	209.08	179.03	210.089	C11H14O4	[M-H]-	Methyl 3-(3-hydroxy-4-methoxyphenyl)propanoate*	Phenolic acids	129150-61-4	-	51191.8	39823.8	61461.3	24858.5	33648.6	38917.2	52738.5	38557.1	76738.4
Wcgn003981	329.09	167.03	330.095	C14H18O9	[M-H]-	Methyl 3-O-glucosyl-4-hydroxybenzoate	Phenolic acids	155112-92-8	-	148025	128313	89531.8	86126.3	120055	77087.3	118734	170105	191800
Zmgn004894	151.04	136.02	152.047	C8H8O3	[M-H]-	Methyl 4-hydroxybenzoate	Phenolic acids	99-76-3	-	700213	564260	1.04622e+06	1.55401e+06	1.62074e+06	1.52919e+06	985399	958016	966252
Wbsp004755	179.07	119.05	178.063	C10H10O3	[M+H]+	Methyl Hydroxycinnamate	Phenolic acids	80540-55-2	-	1.06692e+06	862142	1.71335e+06	1.16684e+06	1.1345e+06	1.12887e+06	1.04132e+06	1.00012e+06	949678
Lahp002797	183.06	123.04	182.058	C9H10O4	[M+H]+	Methyl Orsellinate	Phenolic acids	3187-58-4	-	137331	173416	163220	160516	111938	154248	132900	88840	115495
MWSHC20168	153.02	109.03	154.027	C7H6O4	[M-H]-	Methyl cumalate*	Phenolic acids	6018-41-3	-	644192	374674	576205	571701	359893	383286	461986	454164	396979
MWSmce230	183.03	124.02	184.037	C8H8O5	[M-H]-	Methyl gallate*	Phenolic acids	99-24-1	-	90763.2	65215.1	95035	97348.8	80291.4	81467.2	93216.2	56627.5	63538.9
pmn001669	237.08	207.03	238.084	C12H14O5	[M-H]-	Methyl sinapate	Phenolic acids	20733-94-2	-	18227.9	7307.26	5714.09	9841.15	10645.4	6940.58	6448.6	5568.5	6457.87
Zblp002750	181.09	121.06	180.079	C10H12O3	[M+H]+	Methyl-3-(3-hydroxyphenyl)Propionate	Phenolic acids	61389-68-2	-	157483	248751	293926	278849	429247	208055	208431	228206	293374
Lhhp120813	295.15	179.07	294.147	C16H22O5	[M+H]+	Methylillicinone E	Coumarins	-	-	175582	130358	178603	88668.1	78624.4	144785	125267	118982	127592
Lhhp120812	279.16	149.02	278.152	C16H22O4	[M+H]+	Methylillicinone F	Coumarins	-	-	4.11003e+07	4.56373e+07	5.37464e+07	4.91629e+07	4.46991e+07	5.10397e+07	5.14017e+07	4.51756e+07	4.85252e+07
Wagp008723	345.1	312.06	344.09	C18H16O7	[M+H]+	Mikanin*	Flavones	4324-53-2	-	6702.63	11256.5	101123	78078.1	26039.6	21623	47884.6	39751.5	39340.7
Zmln000668	493.12	169.01	494.127	C19H26O15	[M-H]-	Monogalloyl-diglucose	Phenolic acids	-	-	77909.1	105248	65274.8	156503	158701	249746	114395	117482	113357
pmp000791	271.06	153.05	270.053	C15H10O5	[M+H]+	Moracin Y	Phenolic acids	1252581-54-6	-	76964.5	207463	1.29727e+06	159690	38973.9	59333	269517	293819	283787
Lmyn000160	237.06	87.01	238.069	C8H14O8	[M-H]-	Mucic acid Dimethyl Ester	Phenolic acids	-	-	213522	234934	238009	255662	216589	194627	232852	176027	177752
Lmyn001220	343.03	85.03	344.038	C13H12O11	[M-H]-	Mucic acid-1,4-lactone-3-O-gallate	Phenolic acids	-	-	4284.15	8150.48	8571.81	12435.3	21013.8	4581.79	10886.6	9448.18	9845.94
Lmjp101206	277.11	189.05	276.1	C15H16O5	[M+H]+	Murpaniculol	Coumarins	-	-	755509	222449	477798	42523.7	72221.1	21087.5	217921	203970	312481
Lajp003792	369.12	177.05	368.11	C17H20O9	[M+H]+	Murrayacarpin A glucoside	Coumarins	-	-	169875	196466	69682.7	41050.1	34795.9	10005	140851	86539.4	129277
mws0032	319.04	153.02	318.038	C15H10O8	[M+H]+	Myricetin	Flavonols	529-44-2	C10107	20763.7	10985.5	3.32291e+07	42823	20159.3	32375.1	8.61034e+06	9.17945e+06	9.10883e+06
Lmtp004126	567.1	319.04	566.091	C24H22O16	[M+H]+	Myricetin-3-O-(6''-malony)glucoside	Flavonols	-	-	82398	2700.39	1.91459e+06	6264.33	8340	1670	173394	206650	201270
Lmdp002969	481.1	319.06	480.09	C21H20O13	[M+H]+	Myricetin-3-O-galactoside*	Flavonols	15648-86-9	-	79968.8	96449.5	2.86862e+06	44804.2	89716.5	136800	821708	708235	811057
Lmpp003465	481.1	319.04	480.09	C21H20O13	[M+H]+	Myricetin-3-O-β-D-glucoside*	Flavonols	19833-12-6	-	67101.5	50521.5	3.49574e+06	63680.7	66685	177199	702781	549865	895416
pme0376	271.06	151	272.068	C15H12O5	[M-H]-	Naringenin (5,7,4'-Trihydroxyflavanone)*	Flavanones	480-41-1	C00509	77882.5	32575.3	720928	57329.3	2664.7	24612.1	247922	241673	259764
pme2960	273.08	153.02	272.068	C15H12O5	[M+H]+	Naringenin chalcone; 2',4,4',6'-Tetrahydroxychalcone	Chalcones	73692-50-9	C06561	130535	54138.5	1.40189e+06	107815	13141.2	41145.3	442871	437142	439217
HJN087	433.12	271.06	434.121	C21H22O10	[M-H]-	Naringenin-4'-O-glucoside*	Flavanones	-	-	48770.8	10698.8	158601	17387.4	3621.41	5273.91	46327.2	49080.2	43660.1
Lmbn005454	285.077	119.049	286.084	C16H14O5	[M-H]-	Naringenin-5-methyl ether	Flavones	61823-56-1	-	21554.2	11904	57642.4	847.39	2278.13	152217	25305.5	22696.5	21395.1
pma0791	521.13	273.08	520.122	C24H24O13	[M+H]+	Naringenin-7-O-(6''-malonyl)glucoside	Flavanones	-	-	15382.2	10817.7	75459.6	32013.8	23340	15084	16268.6	26289.9	14273.4
mws1179	433.11	271.07	434.121	C21H22O10	[M-H]-	Naringenin-7-O-glucoside (Prunin)*	Flavanones	529-55-5	C09099	21675	14586.4	217048	20135.4	6346.51	8880.44	40418	55575.6	49889.9
WaYn005089	447.13	285.077	448.137	C22H24O10	[M-H]-	Neosakuranin	Flavanones	-	-	137537	252299	564390	101929	114992	116806	192205	114874	111523
pmp000003	317.07	302.04	316.058	C16H12O7	[M+H]+	Nepetin (5,7,3',4'-Tetrahydroxy-6-methoxyflavone)	Flavones	520-11-6	-	23125.7	12420.5	3.00933e+07	28726.7	9367.33	14419.3	6231730	6.15113e+06	6.22242e+06
Hmgp002148	479.12	317.06	478.111	C22H22O12	[M+H]+	Nepetin-7-O-alloside	Flavones	-	-	43568	50015	8.29961e+07	68355	58028.6	73355	1.50541e+07	1.50069e+07	1.54223e+07
Hmgp002036	479.12	317.06	478.111	C22H22O12	[M+H]+	Nepetin-7-O-glucoside(Nepitrin)*	Flavones	569-90-4	-	278987	29556.1	1.17653e+07	195432	110045	15944.7	1.89707e+06	1.80928e+06	1.7286e+06
mws0043	403.14	373.1	402.132	C21H22O8	[M+H]+	Nobiletin (5,6,7,8,3',4'-Hexamethoxyflavone)	Flavones	478-01-3	C10112	32326.1	24467.5	28276.1	52372.3	42966.8	25147.9	48526.7	22377	24825.9
Lacn005887	533.16	371.11	534.174	C26H30O12	[M-H]-	Noricariside	Flavonols	-	-	1.61154e+06	5.65993e+06	5.51866e+06	327278	1.59579e+06	435146	2.84019e+06	2.85445e+06	2.90713e+06
Hmln002100	535.18	373.13	536.189	C26H32O12	[M-H]-	Nortrachelogenin-4-O-glucoside	Lignans	33464-78-7	-	5.08704e+06	1.02686e+07	9.67805e+06	1.1295e+06	2.18946e+06	1.4005e+06	4.88516e+06	4.91714e+06	5.89545e+06
pmb1207	339.09	177.05	338.079	C19H14O6	[M+H]+	O-Feruloyl 3-hydroxycoumarin	Coumarins	-	-	4.59385e+06	5.85107e+06	9.16388e+06	1.49176e+06	268001	433970	3.61577e+06	3.37345e+06	3.37233e+06
pmb0382	339.09	177.05	338.079	C19H14O6	[M+H]+	O-Feruloyl 4-hydroxycoumarin	Coumarins	-	-	6.02975e+06	4.62248e+06	1.48228e+06	759311	596392	195110	1.83426e+06	2.52749e+06	2.56041e+06
Lmdn001925	537.2	375.15	538.205	C26H34O12	[M-H]-	Olivil-4'-O-glucoside	Lignans	76880-93-8	-	2.055e+06	2.95908e+06	876638	799904	609856	166857	1.07921e+06	1.0865e+06	1.11319e+06
Sacn004878	639.19	477.16	640.2	C29H36O16	[M-H]-	Orobanchoside	Phenolic acids	-	-	62737.6	83015.7	128978	26567.2	21252.9	21589.5	52180.2	62718.5	60618.2
Hmgp001758	657.17	333.06	656.159	C28H32O18	[M+H]+	Patuletin-3-O-gentiobioside	Flavonols	-	-	21675	9536.77	534691	5979.98	3247.82	1407.48	85263	89928.1	105042
Lmjp003231	495.11	333.07	494.106	C22H22O13	[M+H]+	Patuletin-3-O-glucoside*	Flavonols	-	-	118644	416190	1.32725e+06	66685	101820	185913	398474	520227	595296
Hmgp001888	641.17	317.06	640.164	C28H32O17	[M+H]+	Patuletin-3-O-rutinoside	Flavonols	-	-	49352.3	40010	1.79119e+06	19311.2	43345	40396.3	298822	327532	292885
Hmgp001927	657.17	333.06	656.159	C28H32O18	[M+H]+	Patuletin-7-O-gentiobioside	Flavonols	-	-	111346	44639.5	64014.2	12281	10005	9266.52	33340	20005	26675
Hmgp002080	641.17	317.06	640.164	C28H32O17	[M+H]+	Patuletin-7-O-rutinoside	Flavonols	-	-	4826.82	12793.3	670006	1670	12067.2	21706	114597	128395	144774
Yphp008036	371.11	151.07	370.105	C20H18O7	[M+H]+	Paulownin	Lignans	13040-46-5	-	537777	291111	461766	779642	454884	413165	398499	402341	425520
Hmzp003994	479.12	317.08	478.111	C22H22O12	[M+H]+	Pedaliin*	Flavones	22860-72-6	-	9.74263e+06	9.50366e+06	8088485	3676875	964009	1.04624e+07	5.01008e+06	6.25107e+06	5.33961e+06
Zbhn006453	315.05	300.028	316.058	C16H12O7	[M-H]-	Pedalitin	Flavones	22384-63-0	C10119	5592.79	2021.97	5.25981e+06	5841.02	2224.25	1784.12	1.61917e+06	1.54529e+06	1.46888e+06
Lmpp003719	625.16	301.07	625.155	C31H29O14+	[M]+	Peonidin-3-O-(6''-O-caffeoyl)glucoside	Anthocyanidins	-	-	105177	64980.5	6.46305e+06	20285.5	21808	23340	1.15866e+06	1.05315e+06	1.03413e+06
Lmpp003929	609.16	301.07	609.16	C31H29O13+	[M]+	Peonidin-3-O-(6''-O-p-coumaroyl)glucoside	Anthocyanidins	-	-	103881	55261.1	819789	101920	104906	74676.9	80025	51225.6	125584
mws1454	477.14	315.09	478.147	C23H26O11	[M-H]-	Persicoside	Flavanones	28978-03-2	-	54271	57772.8	1.71354e+07	13073.2	3340	8125.75	2.75191e+06	2.69806e+06	2.52395e+06
pmn001554	329.07	123.04	330.074	C17H14O7	[M-H]-	Petasiphenone	Phenolic acids	162616-81-1	-	140238	32267.4	64757.5	7314.82	2032.04	7064.56	41537.9	46888.7	45637.9
Lmpp003228	641.15	317.07	641.15	C31H29O15+	[M]+	Petunidin-3-O-(6''-O-caffeoyl)glucoside	Anthocyanidins	-	-	56418.8	32516.3	2.04293e+06	29788.7	3340	65442.8	304040	351238	306579
Lmwp102713	265.11	173.06	264.1	C14H16O5	[M+H]+	Peucedanol	Coumarins	-	-	514387	43847.9	63211.3	3641.82	5489.74	3353.47	87514.8	90911.6	110266
pmp000531	519.19	357.13	518.179	C26H30O11	[M+H]+	Phellamurin	Flavanonols	52589-11-4	C09808	200145	70020	498180	27016.6	29874.6	158986	84838.4	125986	127151
Lacn005311	533.17	371.11	534.174	C26H30O12	[M-H]-	Phellatin	Flavonols	-	-	1.62077e+06	5.52321e+06	5.74558e+06	328558	1.46185e+06	437707	2.71854e+06	2.87365e+06	2.68568e+06
Lacn004858	535.181	373.128	536.189	C26H32O12	[M-H]-	Phellavin	Flavanonols	-	-	1.61889e+07	8.00852e+07	5.09565e+07	3.46415e+06	4.21559e+06	1.46893e+06	2.92961e+07	3.08514e+07	2.86625e+07
pmp000530	519.19	357.13	518.179	C26H30O11	[M+H]+	Phellodendroside	Flavanonols	40451-69-2	-	258018	523627	465210	69483.2	152043	18340	245679	237886	214211
MWS1848	135.05	92.03	136.052	C8H8O2	[M-H]-	Phenyl acetate	Phenolic acids	122-79-2	C00548	1.30967e+06	370754	1.21819e+06	324413	293835	542515	733854	693715	703053
Hmhn003067	325.09	119.05	326.1	C15H18O8	[M-H]-	Phenylpropionic acid-O-β-D-glucopyranoside	Phenolic acids	-	-	841027	2.80633e+06	8.82405e+06	1.48517e+06	555533	1.1288e+06	3.25974e+06	2.83664e+06	2.99117e+06
pmp000674	373.16	337.14	372.157	C21H24O6	[M+H]+	Phillygenin	Lignans	487-39-8	-	87288.9	41312.9	42491.5	11377.6	7437	19394.6	32282.6	30676	28958.5
mws2118	435.13	167.04	436.137	C21H24O10	[M-H]-	Phloretin-2'-O-glucoside (Phlorizin)	Chalcones	60-81-1	C01604	20005.9	12164.6	167096	21883.1	26702.9	14808.5	43435	27360.9	33139.2
Zbpn005555	435.13	273.08	436.137	C21H24O10	[M-H]-	Phloretin-4'-O-glucoside (Trilobatin)*	Chalcones	4192-90-9	-	74404	43230.2	177366	11670	9978.32	51986.8	52600.9	49908.9	41349.3
Hmhn000927	287.08	125.02	288.084	C12H16O8	[M-H]-	Phloroglucinol-1-O-β-D-glucopyranoside	Phenolic acids	-	-	6839.69	4098.62	6552.65	8476.58	5774.81	3479.42	9762.48	5784.97	5994.93
Sazp011041	343.15	163.07	342.147	C20H22O5	[M+H]+	Phyllnirurin	Lignans	120396-53-4	-	239917	230735	255729	238856	261920	295243	207870	237999	263219
mws2103	243.07	159.05	244.074	C14H12O4	[M-H]-	Piceatannol	Stilbene	10083-24-6	C05901	3092.84	17661.6	80684.4	9548.6	2974.16	14676.5	17070.2	29543	29544.7
Lmln001195	297.1	135.07	298.105	C14H18O7	[M-H]-	Picein (4-Acetylphenyl-glucoside)	Phenolic acids	530-14-3	C10720	7282.81	6630.52	8592.75	9166.32	8166.46	5866.2	6591.98	6734.91	6406.83
mws0097	357.134	151.038	358.142	C20H22O6	[M-H]-	Pinoresinol*	Lignans	487-36-5	C05366	9.50632e+07	9.8369e+06	2.98767e+07	2.49626e+06	889914	3.46401e+06	2.63933e+07	2.60761e+07	2.6167e+07
MWS20158	683.25	341.14	682.247	C32H42O16	[M+H]+	Pinoresinol-4,4'-O-diglucoside	Lignans	63902-38-5	-	58350	102434	224588	40146.8	28340	27155	67025.5	57613.8	82156.8
Rfmb25702	561.2	357.13	562.205	C28H34O12	[M-H]-	Pinoresinol-4-O-(6''-acetyl)glucoside	Lignans	-	-	4.93787e+06	679218	2.41291e+06	144591	59110.4	131073	1.22194e+06	944300	877990
pmn001378	519.19	357.14	520.194	C26H32O11	[M-H]-	Pinoresinol-4-O-glucoside	Lignans	41607-20-9	C17529	2.99976e+07	1.16965e+07	2.12326e+07	2.72714e+06	1.52139e+06	1.98982e+06	1.25727e+07	11582484	1.16627e+07
Qmhp111704	521.2	131.05	520.194	C26H32O11	[M+H]+	Pittogoside B	Lignans	-	-	154212	204062	203765	288379	680611	111414	186907	215506	251038
mws1506	639.19	161.02	640.2	C29H36O16	[M-H]-	Plantamajoside	Phenolic acids	104777-68-6	C10485	4.19386e+07	1.63542e+07	1.05543e+07	2.01405e+06	292381	621076	1.01875e+07	1.04306e+07	9.48097e+06
Zmjn004519	235.1	220.07	236.105	C13H16O4	[M-H]-	Proglobeflowery acid	Phenolic acids	146367-85-3	-	116869	43146.7	273565	193942	201496	206574	160813	157308	158569
MWSmce501	167.04	108.02	168.042	C8H8O4	[M-H]-	Protocatechuic Acid Methyl Ester	Phenolic acids	2150-43-8	-	45099.2	64937.3	31675	52142	52234.2	30010	60886.9	49133.1	22380.1
pmn001367	315.07	153.02	316.079	C13H16O9	[M-H]-	Protocatechuic acid-4-O-glucoside*	Phenolic acids	-	-	339728	723478	507054	270789	295446	304079	359523	337100	352137
mws0918	283.06	268.04	284.068	C16H12O5	[M-H]-	Prunetin (5,4'-Dihydroxy-7-methoxyisoflavone)	Isoflavones	552-59-0	C10521	29138.2	18538.5	43345.7	23735.4	19074.9	16057.7	25300.6	20208	20023.6
MWSmce324	187.04	131.05	186.032	C11H6O3	[M+H]+	Psoralen*	Coumarins	66-97-7	C09305	93950.4	50787	93973.1	44327.4	75380.6	44044	77375.7	53260	46929.6
Lmdn002671	785.251	623.223	786.258	C35H46O20	[M-H]-	Purpureaside C*	Phenolic acids	108648-07-3	C10488	1.00564e+06	55163.7	325331	24063.4	10942.8	13330.3	207213	185722	194062
Lmjp005033	347.08	314.04	346.069	C17H14O8	[M+H]+	Quercetagetin-3,4'-Dimethyl Ether*	Flavonols	-	-	3880	2436.84	60274.4	24337.8	14744.6	27695.3	22337.4	26229.4	23647
Lmfp003403	481.1	319.05	480.09	C21H20O13	[M+H]+	Quercetagetin-7-O-glucoside(Quercetagitrin)*	Flavonols	548-75-4	-	106253	103140	1595560	99726.2	98503.2	131746	890646	823633	786657
pme2954	303.05	137.02	302.043	C15H10O7	[M+H]+	Quercetin	Flavonols	117-39-5	C00389	82271.2	127685	162121	14841.4	7297.68	9098.05	56060.7	54305.5	66370.7
Lmcp004369	331.08	287.05	330.074	C17H14O7	[M+H]+	Quercetin-3',4'-dimethyl ether	Flavonols	3306-29-4	-	61808.4	17112.7	75490.9	37873.2	31773	20005	43345	18340	25335.4
Zbsp004438	627.16	303.05	626.148	C27H30O17	[M+H]+	Quercetin-3,4'-O-di-glucoside	Flavonols	29125-80-2	-	36445.1	13340	244726	28817.5	28018.1	39097.8	28646	55910.8	44977.4
Lmyp003139	617.11	153.02	616.106	C28H24O16	[M+H]+	Quercetin-3-O-(6''-O-galloyl)galactoside	Flavonols	53171-28-1	-	1670	10891.1	42621.5	10046.1	5253.87	1670	22417.4	9595.67	17742.9
Lmdp003286	465.1	303.06	464.096	C21H20O12	[M+H]+	Quercetin-3-O-alloside; Isohyperoside*	Flavonols	35589-21-0	-	313528	178187	834363	244611	369878	269580	540641	377166	421327
mws4183	433.08	300.03	434.085	C20H18O11	[M-H]-	Quercetin-3-O-arabinoside	Flavonols	22255-13-6	-	75923.9	563522	66957.1	74819	123798	67953.6	148340	119727	114562
MWSHY0113	465.1	303.06	464.096	C21H20O12	[M+H]+	Quercetin-3-O-galactoside (Hyperin)*	Flavonols	482-36-0	C10073	313528	178187	834363	244611	369878	269580	540641	377166	421327
mws0091	463.09	300.03	464.096	C21H20O12	[M-H]-	Quercetin-3-O-glucoside (Isoquercitrin)	Flavonols	482-35-9	C05623	408613	645403	555543	536691	517034	306978	614530	302820	323748
pmn001583	609.15	300.03	610.153	C27H30O16	[M-H]-	Quercetin-3-O-robinobioside	Flavonols	52525-35-6	-	276524	254589	439855	351563	331324	203495	412309	178065	198903
mws0059	609.15	301.04	610.153	C27H30O16	[M-H]-	Quercetin-3-O-rutinoside (Rutin)	Flavonols	153-18-4	C05625	256038	178032	246203	274037	197660	148101	261445	102837	153341
mws0856	463.09	301.04	464.096	C21H20O12	[M-H]-	Quercetin-4'-O-glucoside (Spiraeoside)*	Flavonols	20229-56-5	-	284116	462605	4.56817e+06	388224	388665	239439	1.48617e+06	1.29717e+06	1.30715e+06
Lmfn003760	477.07	301.04	478.075	C21H18O13	[M-H]-	Quercetin-4'-O-glucuronide*	Flavonols	201463-36-7	-	149374	149972	146461	1701.4	9709.7	117928	99520.2	84788.6	55356.2
Hmjp003123	479.08	303.06	478.075	C21H18O13	[M+H]+	Quercetin-5-O-glucuronide*	Flavonols	-	-	223183	233963	253825	59424.4	36381.2	137290	156237	117996	74526.6
Smgp004575	465.1	303.05	464.096	C21H20O12	[M+H]+	Quercetin-5-O-β-D-glucoside*	Flavonols	-	-	174981	275498	796078	254384	181491	102642	357349	301955	176780
pmp000589	551.1	303.05	550.096	C24H22O15	[M+H]+	Quercetin-7-O-(6''-malonyl)glucoside	Flavonols	98767-37-4	-	17531.3	13340	479935	8340	15877.6	7952.22	103930	108905	73783.6
mws1329	463.09	301.04	464.096	C21H20O12	[M-H]-	Quercetin-7-O-glucoside	Flavonols	491-50-9	C12639	322138	451904	4.69289e+06	384219	383288	236744	1.51502e+06	1.32667e+06	1.32346e+06
pmb3317	371.1	179.1	372.106	C16H20O10	[M-H]-	Quinacyl syringic acid	Phenolic acids	-	-	182194	104072	148847	9089.88	4059.08	5685.67	60482.8	52704.7	53229.4
Cmdn004031	639.2	621.19	640.2	C29H36O16	[M-H]-	R-Campneoside II	Phenolic acids	91050-24-7	-	2.48423e+07	9.31422e+06	5.91843e+06	1.24475e+06	140259	393227	6.18998e+06	6.06748e+06	5.11385e+06
Lmsp009334	331.08	253.05	330.074	C17H14O7	[M+H]+	Rhamnazin (3,4',5-Trihydroxy-3',7-dimethoxyflavone)	Flavonols	552-54-5	-	26814.5	45136.4	18724.2	28134.9	9245.11	10775.3	21284.3	17633.9	21340.2
Wahp006113	507.15	345.1	506.142	C24H26O12	[M+H]+	Rhamnazine-4'-O-β-D-glucoside	Flavones	-	-	14575.2	81963.2	1.29607e+06	10103.4	6276.8	21066.6	237059	255052	268117
Lmjp002906	479.12	317.07	478.111	C22H22O12	[M+H]+	Rhamnetin-3-O-Glucoside*	Flavonols	27875-34-9	-	2.31113e+06	1.19142e+06	5.25769e+06	150482	90035	208162	1.83531e+06	1.87656e+06	1.64878e+06
HJAP120	625.17	317.07	624.169	C28H32O16	[M+H]+	Rhamnetin-3-O-Rutinoside*	Flavonols	-	-	55015	36675	83365	55015	55015	16041.4	49472.5	28340	20746.6
mws0988	315.051	165.044	316.058	C16H12O7	[M-H]-	Rhamnetin; 3,5,3',4'-Tetrahydroxy-7-Methoxyflavone	Flavonols	90-19-7	C10176	762.376	608.076	552406	25622	22210.7	25583.1	130458	142509	140352
Lmjp004941	301.07	286.05	300.063	C16H12O6	[M+H]+	Rhamnocitrin (7-Methylkaempferol)*	Flavones	569-92-6	C17059	246078	295406	3.47471e+07	219310	17724.8	35843.1	8.14494e+06	8.37479e+06	8.18646e+06
Lacn005442	663.229	501.175	664.237	C32H40O15	[M-H]-	Rhamnosyl Phellamurin	Flavanonols	-	-	476837	193883	321683	23565.5	92993.2	23178.5	265358	191329	201947
Lmdp003146	167.11	93.07	166.099	C10H14O2	[M+H]+	Rhododendrol	Phenolic acids	501-96-2	-	222058	289700	254603	846147	813011	361273	417775	394468	383855
Smbp005175	345.09	330.07	344.09	C18H16O7	[M+H]+	Rivularin*	Flavones	70028-59-0	-	12338.6	14398.9	109221	95885.4	25701	23103.4	40811.8	40194.2	37907.1
Lmjn005433	373.093	135.045	374.1	C19H18O8	[M-H]-	Rosmarinic acid methyl ester	Phenolic acids	99353-00-1	-	209770	97611.6	183514	6952.53	5005	4174.58	106098	118837	113548
pmn001710	521.13	359.08	522.137	C24H26O13	[M-H]-	Rosmarinic acid-3'-O-glucoside	Phenolic acids	910028-78-3	-	409799	1.15603e+06	594692	47559.3	83817.5	51934.2	369691	310499	236462
Zmcp102702	523.22	219.1	522.21	C26H34O11	[M+H]+	Saikolignanoside A	Lignans	-	-	157384	66646.8	125051	5005	8428.45	14909.5	64697.8	80104.8	56980.9
WaYn005980	431.135	163.04	432.142	C22H24O9	[M-H]-	Salicin 7-O-p-Coumarate	Phenolic acids	-	-	46554.8	35013.6	35642.1	83187.4	72372.1	38695.8	65890.9	28815.3	36710.2
MWSmce274	123.049	93.0376	124.052	C7H8O2	[M-H]-	Salicyl Alcohol	Phenolic acids	90-01-7	C02323	203559	68139.4	78440	62362.5	50102	91214.9	105048	88574.7	82308.8
Lmgn001670	137.03	108.02	138.032	C7H6O3	[M-H]-	Salicylic acid	Phenolic acids	69-72-7	C00805	557268	346377	567485	524967	476425	284075	424824	438269	461601
Zmhn001926	299.08	137.02	300.084	C13H16O8	[M-H]-	Salicylic acid O-glycoside*	Phenolic acids	-	-	1.71414e+06	2.11953e+06	5.38065e+06	405639	595188	1.12251e+06	1.99212e+06	2.01901e+06	2.00526e+06
pmb3142	299.08	137.02	300.084	C13H16O8	[M-H]-	Salicylic acid-2-O-glucoside	Phenolic acids	10366-91-3	-	2.95876e+06	9.10691e+06	8.0309e+06	8.32241e+06	2.01594e+06	4.58426e+06	5.28462e+06	5.00854e+06	5.49983e+06
mws2367	299.114	119.05	300.121	C14H20O7	[M-H]-	Salidroside	Phenolic acids	10338-51-9	C06046	84013.4	237050	739572	68549.3	39312.1	221648	267579	248611	239392
WaYn004134	463.124	179.035	464.132	C22H24O11	[M-H]-	Salirepin 6'-O-Caffeate	Phenolic acids	-	-	105331	47718.2	35177.2	6041.64	15287.7	7494.34	50140.3	49891	43120.2
Lskp211387	353.1	135.04	352.095	C20H16O6	[M+H]+	Savinin	Lignans	493-95-8	-	1.17459e+07	9.211e+06	7.24289e+06	7.29677e+06	6.06496e+06	5.3154e+06	6.03565e+06	6.1529e+06	6.43653e+06
mws2162	433.22	415.21	432.215	C24H32O7	[M+H]+	Schisandrin; Schizandrin; Schizandrol A	Lignans	7432-28-2	C17064	146199	70875.4	231227	88280.7	43380	78727.7	100948	99966.1	98075.5
MWSHC20155	191.035	176.012	192.042	C10H8O4	[M-H]-	Scopoletin (7-Hydroxy-6-methoxycoumarin)	Coumarins	92-61-5	C01752	427829	125764	196140	13231.3	26675	50853.2	144327	131155	146903
mws1077	355.1	193.05	354.095	C16H18O9	[M+H]+	Scopoletin-7-O-glucoside (Scopolin)	Coumarins	531-44-2	C01527	444520	516756	588649	371447	459555	185127	426625	408598	426065
Lmdp006732	301.07	258.05	300.063	C16H12O6	[M+H]+	Scutellarein-4'-methyl ether (5,6,7-Trihydroxy-4'-methoxyflavone)	Flavones	6563-66-2	-	24682.8	20448.3	3.24209e+06	33083.4	9730.68	2072.39	706959	708264	745351
Smbp004322	301.07	286.05	300.063	C16H12O6	[M+H]+	Scutevulin*	Flavones	80713-32-2	-	282747	285253	3.47784e+07	225855	18525.9	16338	8.18819e+06	8.33179e+06	8.15747e+06
Lmtn003096	523.22	361.14	524.226	C26H36O11	[M-H]-	Secoisolariciresinol 4-O-glucoside	Lignans	-	-	198647	2.0355e+06	601887	200420	301626	222415	709641	508625	562185
Zmzp004111	317.06	302.04	316.058	C16H12O7	[M+H]+	Selagin	Flavones	-	-	861234	703425	188465	278610	195342	777422	457699	461187	356991
Zmcp102202	205.09	149.02	204.079	C12H12O3	[M+H]+	Senkyunolide C	Phenolic acids	-	-	4.67715e+06	6.00585e+06	5.50856e+06	6.81794e+06	6.14136e+06	6.92872e+06	6.29388e+06	6.71942e+06	5.67081e+06
pmd0209	355.12	135.04	354.11	C20H18O6	[M+H]+	Sesamin*	Lignans	607-80-7	C10882	5.99002e+06	5.72763e+06	4.64259e+06	5.21044e+06	5.04347e+06	4.81803e+06	4.78567e+06	5.00819e+06	5.27192e+06
Hmzp005336	695.22	371.11	694.211	C32H38O17	[M+H]+	Sesaminol 2-O-Beta-D-Gentiobioside	Lignans	-	-	5.51854e+06	3.33346e+06	8.83312e+06	3.36425e+06	3.53446e+06	5.01955e+06	4.51774e+06	4.17363e+06	3.2733e+06
Hmzp004633	857.27	371.12	856.264	C38H48O22	[M+H]+	Sesaminol 2-O-Beta-D-Gentiotrioside	Lignans	-	-	2.34478e+06	838761	5.94768e+06	3.75865e+06	6.46837e+06	1.13477e+06	3.52399e+06	3.69964e+06	2.24343e+06
Hmzp006046	533.17	371.11	532.158	C26H28O12	[M+H]+	Sesaminol 2-O-Beta-D-Glucoside	Lignans	153512-13-1	-	1.10506e+06	906627	1.27817e+06	895513	601192	427285	679719	645274	753373
Hmzp007128	371.12	149.03	370.105	C20H18O7	[M+H]+	Sesaminol*	Lignans	74061-79-3	-	7.20814e+06	3.99977e+06	5.32197e+06	9.40415e+06	5.98754e+06	5.02779e+06	5.26676e+06	4.90859e+06	5.43628e+06
Hmzn006432	371.11	138.08	372.121	C20H20O7	[M-H]-	Sesamolinol	Lignans	100016-94-2	C10883	1.74435e+06	1.65821e+06	1.79368e+06	1.1061e+06	3.20743e+06	2.46512e+06	2.08603e+06	1.99591e+06	2.19184e+06
Hmzn004430	695.22	371.11	696.226	C32H40O17	[M-H]-	Sesamolinol 4'-O-β-D-Glucosyl (1→6)-O-β-D-Glucoside	Lignans	-	-	8.06329e+06	2.76483e+07	5.72443e+06	626894	251895	711719	7.80966e+06	7.6654e+06	8.2154e+06
Hmzn005420	533.17	371.11	534.174	C26H30O12	[M-H]-	Sesamolinol-glucoside	Lignans	-	-	413302	1.01223e+06	428636	36128.1	69315.6	55569.9	350229	319864	335470
pmn001581	315.051	241.049	316.058	C16H12O7	[M-H]-	Sexangularetin	Flavonols	571-74-4	C10185	8452.83	33339.9	115818	3893.23	13693.2	132394	50708.8	46850.1	50784.2
pmn001468	461.13	137.02	462.137	C19H26O13	[M-H]-	Sibiricose A3	Phenolic acids	139726-39-9	-	491228	663023	631369	92128.3	170666	192984	355836	340337	373493
pmn001459	547.17	205.05	548.174	C23H32O15	[M-H]-	Sibiricose A6	Phenolic acids	241125-75-7	-	319365	82233.4	223536	41803.1	25005	31629.8	123800	93538.6	106019
Zmln002252	223.03	149.03	224.032	C10H8O6	[M-H]-	Sideretin (5,7,8-Trihydroxy-6-methoxycoumarin)	Coumarins	-	C22007	5.77957e+06	835761	4.31634e+06	173667	105929	162337	2.27313e+06	2.02106e+06	1.97544e+06
mws4085	223.06	193.02	224.069	C11H12O5	[M-H]-	Sinapic acid	Phenolic acids	530-59-6	C00482	5.36683e+06	787927	4.47117e+06	188268	101788	139136	2.12309e+06	1.95809e+06	1.85286e+06
Lmtp004382	209.08	149.06	208.074	C11H12O4	[M+H]+	Sinapinaldehyde	Phenolic acids	4206-58-0	C05610	1.60255e+06	1.77464e+06	1.48803e+06	2.10056e+06	2.08383e+06	1.9889e+06	1.40885e+06	1.20491e+06	1.3351e+06
mad2394	501.1	337.05	502.111	C24H22O12	[M-H]-	Sinapoyl-p-coumaroyltartaric acid	Phenolic acids	-	-	1.26291e+06	309761	932214	82956.7	148050	45259	467210	425606	402551
Lmhn003802	561.13	337.06	562.132	C26H26O14	[M-H]-	Sinapoylsinapoyltartaric acid	Phenolic acids	-	-	1.59985e+06	328374	51785.7	23954.5	75486.4	7443.44	323843	274557	290137
mws0853	209.08	179.07	210.089	C11H14O4	[M-H]-	Sinapyl alcohol*	Phenolic acids	537-33-7	C02325	56131.3	78381.5	69708.4	16321.9	18933.9	47029.7	35271.8	47645.6	60926.5
Lhqp101805	325.09	163.04	324.084	C15H16O8	[M+H]+	Skimmin (7-Hydroxycoumarin-7-O-glucoside)	Coumarins	93-39-0	-	3.12146e+06	2.10241e+06	2.24206e+06	642333	204514	322052	1.43767e+06	1.3829e+06	1.45381e+06
HJN089	431.1	268.04	432.106	C21H20O10	[M-H]-	Sophoricoside	Isoflavones	152-95-4	-	20625.6	21937.2	106537	11369.6	5005	4528.02	18701.8	25614.7	29773.8
WaYp004612	465.14	303.09	464.132	C22H24O11	[M+H]+	Sterubin 5-O-Glucoside*	Flavanones	-	-	152782	250474	866667	307561	161776	126452	385266	371328	201815
Zblp005947	535.22	355.15	534.207	C27H34O11	[M+H]+	Styraxjaponoside B	Lignans	-	-	1.01681e+06	757585	902989	11670	46680	153751	478995	359019	413966
Zmln000899	343.11	181.05	344.111	C15H20O9	[M-H]-	Syringaldehyde-4-O-glucoside	Phenolic acids	-	-	1.33994e+07	1.55952e+07	1.60749e+07	1.5787e+07	1.7209e+07	1.33926e+07	1.32901e+07	1.27483e+07	1.23484e+07
mws1350	181.05	151	182.058	C9H10O4	[M-H]-	Syringaldehyde; 4-Hydroxy-3,5-Dimethoxybenzaldehyde	Phenolic acids	134-96-3	-	816391	605970	369899	794578	871624	1.14638e+06	604887	493302	544729
Yamn004825	579.2	339.12	580.216	C28H36O13	[M-H]-	Syringaresinol-4'-O-glucoside	Lignans	-	-	252815	437110	279608	701730	826434	317209	317752	404509	405874
HJAP006	509.13	347.08	508.122	C23H24O13	[M+H]+	Syringetin-7-O-glucoside*	Flavonols	-	-	125004	61685	834037	209025	263517	126362	257138	249972	263337
Zbsn007580	345.06	330.04	346.069	C17H14O8	[M-H]-	Syringetin; 3,5,7,4'-Tetrahydroxy-3',5'-dimethoxyflavone	Flavonols	4423-37-4	C11620	8084.37	2110.91	366423	9420.81	6050.89	8948.46	155670	176492	177021
mws0027	197.05	123.01	198.053	C9H10O5	[M-H]-	Syringic acid	Phenolic acids	530-57-4	C10833	28952.5	1.03059e+06	1.15693e+06	371866	273681	413406	1.63402e+06	1.52836e+06	1.48994e+06
Wchn003509	359.1	239.06	360.106	C15H20O10	[M-H]-	Syringoyl-D-Glucose	Phenolic acids	-	-	633599	479062	19439.5	6670	6022.51	19486.5	172679	182299	142471
Zmhp005139	565.12	317.07	564.111	C25H24O15	[M+H]+	Tamarixetin-3-O-(6''-malonyl)glucoside	Flavonols	-	-	21744.5	6103.05	2.76316e+06	9909.81	10870.4	5005	750729	790331	835879
Lmcp003402	479.12	317.06	478.111	C22H22O12	[M+H]+	Tamarixetin-3-O-glucoside (Tamarixin)	Flavonols	27542-39-8	-	139693	73569.1	171775	125216	135729	501264	142957	196810	154620
HJN051	623.16	315.05	624.169	C28H32O16	[M-H]-	Tamarixetin-3-O-rutinoside	Flavonols	-	-	149868	59494.8	74464.2	92919.8	97455.7	60124.7	117654	66708.9	62643
MWS20189	301.07	286.05	300.063	C16H12O6	[M+H]+	Tectorigenin*	Isoflavones	548-77-6	C10534	260337	303449	3.53856e+07	213434	21700.5	30431.3	8.31524e+06	8.2236e+06	8.30796e+06
Zbln004575	477.142	161.024	478.15	C23H26O11	[M-H]-	Tetrahydrorengyoxide-glucose-caffeoyl	Phenolic acids	-	-	2.01562e+06	1.16722e+06	689835	71285.8	48544.8	27883.4	610346	550414	538553
Yarn004381	581.22	329.14	582.231	C28H38O13	[M-H]-	Tortoside B	Lignans	-	-	138052	273771	124583	20519.2	41644.8	12078.3	134207	85387.3	116685
Hmln003169	387.14	329.14	388.152	C21H24O7	[M-H]-	Trachelogenin	Lignans	34209-69-3	C10891	85337.3	20164.2	56919.1	20850.3	39668.2	39222.8	32140.8	38653.8	36464.4
Hmln002161	711.25	387.15	712.258	C33H44O17	[M-H]-	Trachelogenin-4'-O-gentiobioside	Lignans	106647-13-6	-	117254	259561	52311.6	30432.6	45622.9	36384.6	97204.7	100485	85320.3
MWSprf094	549.2	387.14	550.205	C27H34O12	[M-H]-	Tracheloside*	Lignans	33464-71-0	-	90569.3	9.05183e+06	73355	59184	79944.1	139783	1.4139e+06	1.72487e+06	2.103e+06
pmb0751	321.1	147.04	320.09	C16H16O7	[M+H]+	Trans-5-O-(p-Coumaroyl)shikimate	Phenolic acids	-	C02947	226837	60749.8	134930	156851	85394.6	35309.8	71203.6	96093.9	178255
Wayn004603	477.07	301.04	478.075	C21H18O13	[M-H]-	Tricetin 3'-glucuronide*	Flavones	-	-	169071	160990	124516	23309.8	9033.71	101522	110522	77322.6	54393.5
Wayn004373	615.099	301.036	616.106	C28H24O16	[M-H]-	Tricetin 5-(4''-galloylrhamnoside)	Flavones	-	-	27796.7	6670	23101.5	23735	32080.6	27122.3	17705.3	17968.2	21542.4
pma0795	551.1	303.05	550.096	C24H22O15	[M+H]+	Tricetin-5-O-(6''-malonyl)glucoside	Flavones	-	-	152622	103946	361400	14122.7	1399.79	2209.41	162554	127196	71029.2
Lmzp004885	331.08	315.05	330.074	C17H14O7	[M+H]+	Tricin (5,7,4'-Trihydroxy-3',5'-dimethoxyflavone)	Flavones	520-32-1	C10193	6534.21	52566.2	3.3261e+06	2618.48	657.36	1106.87	896742	927243	908483
pmb0746	527.15	331.08	526.148	C27H26O11	[M+H]+	Tricin-4'-O-(guaiacylglycerol)ether	Flavones	-	-	26254.6	27878.5	1.54125e+06	27588.6	30022.5	14951.9	314644	327417	327278
Lmhp206353	493.13	331.08	492.127	C23H24O12	[M+H]+	Tricin-4'-O-glucoside*	Flavones	-	-	306771	191353	4.67191e+07	464042	352850	244190	7.63084e+06	7.43363e+06	6.80541e+06
pmb0716	655.19	331.08	654.18	C29H34O17	[M+H]+	Tricin-4'-O-glucoside-7-O-glucoside*	Flavones	-	-	13632.8	16675	1.43627e+06	10005	5297.29	3340	134731	180128	180325
Zbsp004455	655.18	331.08	654.18	C29H34O17	[M+H]+	Tricin-5,7-O-diglucoside*	Flavones	-	-	44529.1	16175.4	3.4411e+06	7064.84	15602.4	44739.8	787937	585062	624211
Zbsp003941	655.18	331.08	654.18	C29H34O17	[M+H]+	Tricin-7-O-(2''-O-glucosyl)glucoside*	Flavones	-	-	33778.8	19896.3	1.29749e+07	16744.2	13509.2	1670	2.19226e+06	2.27931e+06	2.3346e+06
pmb0738	699.19	331.08	698.185	C34H34O16	[M+H]+	Tricin-7-O-(2''-Sinapoyl)glucoside	Flavones	-	-	104308	11949.5	1.34194e+06	19487.3	22466.6	10238.4	220311	225006	223114
pmb0725	669.18	331.08	668.174	C33H32O15	[M+H]+	Tricin-7-O-(2''-feruloyl)glucoside	Flavones	-	-	41809.4	6429.44	2.66868e+06	9621.15	4571.96	6534.79	428611	446630	440292
Zmxp005470	579.13	331.08	578.127	C26H26O15	[M+H]+	Tricin-7-O-(6''-O-malonyl)glucoside*	Flavones	-	-	59877.9	30060.8	4.59103e+06	80979.5	49453.1	26607.7	796412	813036	795249
pmb0736	493.13	331.08	492.127	C23H24O12	[M+H]+	Tricin-7-O-Glucoside*	Flavones	32769-01-0	-	287139	231362	4.37041e+07	531727	364855	499155	8.0465e+06	6.95845e+06	7.85898e+06
Lmgp004959	639.19	331.08	638.185	C29H34O16	[M+H]+	Tricin-7-O-neohesperidoside*	Flavones	53766-40-8	-	83846.5	141740	178450	146008	265250	57786.2	152025	76690	63816.2
Hmgp003086	639.19	331.08	638.185	C29H34O16	[M+H]+	Tricin-7-O-rutinoside*	Flavones	-	-	94880.6	111567	248910	249324	147266	119199	162561	106751	74946.1
pmb3041	521.094	329.2	522.101	C23H22O14	[M-H]-	Tricin-7-O-saccharic acid	Flavones	-	-	3.10182e+06	7.30877e+06	2.63201e+06	427931	533151	523338	2.28599e+06	2.70833e+06	3.24026e+06
Qazn005459	827.26	665.23	828.269	C37H48O21	[M-H]-	Tubuloside A	Phenolic acids	112516-05-9	-	183989	115280	469904	122555	369077	43328.2	227993	223646	258652
mws2368	137.06	119.05	138.068	C8H10O2	[M-H]-	Tyrosol; 4-Hydroxyphenylethanol	Phenolic acids	501-94-0	C06044	199915	99154.9	162546	105578	95948.5	59405.1	110608	137047	101916
Wagp002962	471.15	163.04	470.142	C21H26O12	[M+H]+	Umbelliferone 7-O-Rutinoside	Coumarins	-	-	172134	119299	92514.1	30319	14508.7	15148.7	69520.2	69713.7	50375.4
Labn005411	521.2	89.02	522.21	C26H34O11	[M-H]-	Urolignoside	Lignans	131723-83-6	-	1.33859e+06	109097	748377	59057.2	20551.9	204572	473339	495327	500732
mws0028	167.03	108.02	168.042	C8H8O4	[M-H]-	Vanillic acid	Phenolic acids	121-34-6	C06672	1.20846e+07	4.2872e+06	1.04597e+07	3.68107e+06	2.17003e+06	3.0834e+06	6.18479e+06	6.02657e+06	5.98171e+06
MWSmce455	181.051	107.015	182.058	C9H10O4	[M-H]-	Vanillic acid methyl ester	Phenolic acids	3943-74-6	-	26590.5	50451.9	30144.7	18730.6	14517.5	33892	32752.4	35124.4	36068.9
Zmtn001661	315.11	153.02	316.116	C14H20O8	[M-H]-	Vanilloloside	Phenolic acids	74950-96-2	-	12823	13349.9	55964.3	14011.2	17249.7	11676.2	17882.2	14616.5	14777.9
MWSmce663	153.055	120.022	154.063	C8H10O3	[M-H]-	Vanillyl alcohol	Phenolic acids	498-00-0	-	32654.9	57319.9	108900	20953.1	17423.4	54909.2	41472.2	38670.7	38242.3
Hmgn001278	461.17	315.1	462.174	C20H30O12	[M-H]-	Verbasoside	Phenolic acids	61548-34-3	-	2.65902e+06	365385	505682	108732	23659.7	54106	487771	493356	478135
Zbsn003878	563.148	353.072	564.148	C26H28O14	[M-H]-	Vicenin-3	Flavones	59914-91-9	-	576419	452664	682400	801759	630821	413502	781680	360113	389238
Zmhn002912	595.158	301.072	596.174	C27H32O15	[M-H]-	Viscumneoside III(Homoeriodictyol-7-O-Apiosyl-(1-2)-Glucopyranoside)	Flavones	118985-27-6	-	397406	196644	300212	11333.5	2487.69	12958.8	125457	111983	128707
Wbmp004309	325.09	163.04	324.1	C19H16O5	[M+H]+	Vitexdoin C	Lignans	-	-	5.35131e+07	8.56263e+06	2.56535e+07	4.92511e+06	846190	1.53612e+06	26537025	1.76165e+07	1.72377e+07
Wbmp005319	341.11	175.04	340.095	C19H16O6	[M+H]+	Vitexdoin D	Lignans	-	-	3.41846e+06	1.88194e+06	2.85674e+06	508482	285547	389225	1.28996e+06	1.55115e+06	1.3253e+06
pme3227	579.17	433.11	578.164	C27H30O14	[M+H]+	Vitexin-2''-O-rhamnoside	Flavones	64820-99-1	C12628	287213	167900	193013	402046	332406	130320	284322	134916	171381
pmb0678	771.21	177.1	770.206	C37H38O18	[M+H]+	Vitexin-7-O-(6''-feruloyl)glucoside	Flavones	-	-	142992	85157	117812	173516	146495	58072.2	127496	65030.1	111715
Lhnp111727	375.14	151.04	374.137	C20H22O7	[M+H]+	Vladinol D	Lignans	-	-	5.68682e+06	1.24162e+06	4.04517e+06	330979	169722	490129	2.07577e+06	1.98344e+06	2.0468e+06
Lmhn002321	461.07	167.04	462.08	C21H18O12	[M-H]-	Vnilloylcaffeoyltartaric acid	Phenolic acids	-	-	81909.9	367623	36675	71029.5	30378	33719.1	76949.5	77839.3	71437.1
Lmhn002051	283.05	167.04	284.053	C12H12O8	[M-H]-	Vnilloylmalic acid	Phenolic acids	-	-	39312.9	117568	36363.7	10460.5	9604.78	4167.72	27792	35083.6	22889.6
Lmhn001386	299.04	167.03	300.048	C12H12O9	[M-H]-	Vnilloyltartaric acid	Phenolic acids	-	-	128911	106684	161817	82680.4	75372.1	124927	92705.1	103743	101566
Cmyp002064	463.12	301.08	462.116	C22H22O11	[M+H]+	Yuanhuanin*	Flavones	83133-14-6	-	1.52531e+06	1.87176e+06	8.50275e+06	796945	446374	3880505	2.47855e+06	2.23053e+06	2.23263e+06
Laxp005313	603.17	355.12	602.164	C29H30O14	[M+H]+	Yukovanol malonyl glucoside	Flavonols	-	-	44960.5	27686.3	93060.4	20222.1	89104.2	38569.1	34756.2	45169.7	30939.1
HX1362	179.03	123.04	178.027	C9H6O4	[M+H]+	aesculetine	Coumarins	-	-	456155	130689	579344	141920	127098	153231	244088	207693	251814
Sayp004048	317.1	302.04	316.095	C17H16O6	[M+H]+	caesalpiniaphenol A	Flavones	-	-	840505	647633	633075	333730	232002	855183	694086	612990	539360
Labn002602	477.12	153.02	478.132	C19H26O14	[M-H]-	chinenionside B	Phenolic acids	-	-	155686	271530	170315	189326	131930	50505.2	120051	123434	133498
HX1367	147.04	91.06	146.037	C9H6O2	[M+H]+	coumarin	Coumarins	-	-	1.20775e+07	1.43862e+06	3.63881e+07	4.42573e+06	819648	3.13159e+06	1.17628e+07	1.03704e+07	9.81035e+06
Wmcn000039	461.17	135.04	462.174	C20H30O12	[M-H]-	decaffeoylverbascoside	Phenolic acids	-	-	6.61315e+06	927958	1.39019e+06	289342	87975.5	136732	1.38021e+06	1.35314e+06	1.29838e+06
Lskp211385	357.13	307.09	356.126	C20H20O6	[M+H]+	dihydrosesamin*	Lignans	-	-	1.85884e+06	1.85389e+06	5.96412e+06	449043	737692	1.30164e+06	2.01488e+06	2.02383e+06	1.89992e+06
Lskp211249	387.18	137.06	386.173	C22H26O6	[M+H]+	epieudesmin	Lignans	-	-	3.52548e+06	1.19144e+06	1.23268e+06	128452	124913	123747	949970	989788	999870
Labn002716	373.076	169.015	374.085	C15H18O11	[M-H]-	galloyl acetyl glucoside	Phenolic acids	-	-	14611.9	21272.9	18820.7	23601.4	31455.7	26109.2	9283.38	15338.1	23595.9
Jmyn002224	357.12	135.04	358.126	C16H22O9	[M-H]-	glucoacetosyringone	Phenolic acids	86402-41-7	-	35520	58736.6	39439.7	81260.3	80007.4	76876.8	41674.4	56190.8	61488
Zapp006824	365.14	243.1	364.131	C22H20O5	[M+H]+	gnetupendin A	Stilbene	-	-	4.23924e+06	4.63633e+06	4.60922e+06	4.86941e+06	4.68422e+06	4.70289e+06	4.66995e+06	4.68719e+06	4.86472e+06
Lcsn000192	683.26	329.14	684.263	C32H44O16	[M-H]-	indigoticoside A	Lignans	-	-	14292.1	119461	9544.63	1922.06	10942.2	1999.83	20197.9	21582.3	20454.9
Lcsn000193	597.22	327.12	598.226	C28H38O14	[M-H]-	isatioxyneolignoside E	Lignans	-	-	41219.5	28410.5	31175.3	80198.4	135965	20858.6	49412	24839.6	44876
Hmzp002119	261.1	137.06	260.09	C11H16O7	[M+H]+	latifonin	Lignans	-	-	193190	358106	245590	345272	427011	153100	270308	264419	259413
Wdtp003242	397.15	235.1	396.142	C19H24O9	[M+H]+	methyl-4,5-diacetyloxy-6-[4-(hydroxymethyl)phenoxy]-3-methyloxane-2-carboxylate	Phenolic acids	-	-	232292	510303	351270	169362	166369	144313	296042	264375	259764
pme1439	165.05	119.05	164.047	C9H8O3	[M+H]+	p-Coumaric acid	Phenolic acids	501-98-4	C00811	5.84117e+06	1090835	1.9074e+07	814845	530995	580265	6.11352e+06	6.01497e+06	6.15712e+06
mws1195	179.07	147.04	178.063	C10H10O3	[M+H]+	p-Coumaric acid methyl ester	Phenolic acids	19367-38-5	-	401405	72027.1	425924	65812.3	73130	44881.7	246627	217467	237369
Yaap002576	327.11	147.04	326.1	C15H18O8	[M+H]+	p-Coumaric acid-4-O-glucoside	Phenolic acids	117405-48-8	C06739	50031.1	137346	347607	88401.7	32325.8	82085.5	165208	158728	139377
Sacn004532	477.14	301.03	478.147	C23H26O11	[M-H]-	plantainoside B	Phenolic acids	-	-	160327	147246	139713	28382.5	9662.65	103665	84661.5	68589.7	55457.4
Yphn003868	639.2	639.19	640.2	C29H36O16	[M-H]-	plantalloside	Phenolic acids	-	-	6.71947e+07	2.95605e+07	2.14627e+07	4.24105e+06	742741	1.38767e+06	2.05275e+07	1.94664e+07	1.78964e+07
Ladp004569	579.17	331.12	578.164	C27H30O14	[M+H]+	portulacanone C malonyl glucoside	Other Flavonoids	-	-	69155.9	12620.3	9.35551e+06	81719.6	46559.2	43538.5	1.68312e+06	1.61962e+06	2.2539e+06
Zmcp102703	521.2	131.05	520.194	C26H32O11	[M+H]+	saikolignanoside D*	Lignans	-	-	132821	195733	247643	322905	699784	107663	228993	218970	227139
Zmdp006307	359.15	137.06	358.142	C20H22O6	[M+H]+	sanshodiol	Lignans	-	-	1.02366e+07	3.06101e+06	6.39925e+06	119883	63823	282648	3.38453e+06	3.4158e+06	3.57031e+06
Smjp003858	369.09	319.06	368.09	C20H16O7	[M+H]+	taiwanin H	Lignans	-	-	102952	305927	382317	17421.4	39578.6	25084.2	170429	171001	157972
Ladp005795	317.06	302.04	316.058	C16H12O7	[M+H]+	tenuiflorin C	Other Flavonoids	-	-	29491	7179.12	2.95609e+07	29237.5	15738.9	6733.53	6.16915e+06	6.20357e+06	6.17817e+06
Lmbn002648	163.04	119.05	164.047	C9H8O3	[M-H]-	α-Hydroxycinnamic Acid*	Phenolic acids	5801-57-0	C02763	2.41394e+06	237167	7.50658e+06	213814	73988.7	138081	2.06416e+06	1.99567e+06	1.88218e+06
Hmln002996	639.19	621.18	640.2	C29H36O16	[M-H]-	β-Hydroxyacteoside	Phenolic acids	95587-86-3	C17528	144259	123575	66953.1	58581	49144.4	21841.5	60956.6	78562.4	91952.7
Hmgn002038	637.18	475.14	638.185	C29H34O16	[M-H]-	β-Oxoacteoside	Phenolic acids	-	-	87067.3	111161	182792	32893.3	41269.6	28994.7	119831	113888	87701.1

## Sheet: Table S4
Table S4. List of the 320 differentially accumulated phenolic compounds.
Index	Compounds	Class	Formula	VIP	P-value	FDR	Log2FC	Type
Lmpp003719	Peonidin-3-O-(6''-O-caffeoyl)glucoside	Anthocyanidins	C31H29O14+	1.03875	0.41137	0.548435	-6.66353	down
Lmpp003296	Delphinidin-3-O-glucuronide	Anthocyanidins	C21H19O13+	1.11984	0.131144	0.541992	-1.46418	down
Xmgp006913	2,4,2',4'-tetrahydroxy-3'-prenylchalcone	Chalcones	C20H20O5	1.45658	0.0907606	0.541992	-3.52294	down
Labn004865	Hydroxy isoliquiritigenin glucoside	Chalcones	C21H22O10	1.1656	0.330772	0.548435	-3.24629	down
Wcfp003437	3-Prenyl-4,2',4'-Trihydroxychalcone	Chalcones	C20H20O4	1.47844	0.0405527	0.541992	-2.18285	down
Zbpn005555	Phloretin-4'-O-glucoside (Trilobatin)	Chalcones	C21H24O10	1.16239	0.203089	0.548435	-2.00225	down
Lmwp102713	Peucedanol	Coumarins	C14H16O5	1.38114	0.317526	0.548435	-5.63736	down
Lbhp011918	Esculin glucoside	Coumarins	C21H26O14	1.17187	0.369424	0.548435	-4.75667	down
Zmln002252	Sideretin (5,7,8-Trihydroxy-6-methoxycoumarin)	Coumarins	C10H8O6	1.41343	0.139843	0.541992	-4.62854	down
mws1013	Esculetin (6,7-Dihydroxycoumarin)	Coumarins	C9H6O4	1.23513	0.168282	0.541992	-3.84237	down
Lmxp004495	8-Hydroxycoumarin	Coumarins	C9H6O3	1.33302	0.186185	0.542451	-3.53617	down
Lmjp101206	Murpaniculol	Coumarins	C15H16O5	1.38665	0.10237	0.541992	-3.42187	down
zjgp122320	6-hydroxycoumarin	Coumarins	C9H6O3	1.28098	0.266545	0.548435	-3.37113	down
Lhqp101806	Eleutheroside B1	Coumarins	C17H20O10	1.36956	0.123835	0.541992	-3.35434	down
Lamp006225	Hydroxymethyl coumarin glucoside	Coumarins	C16H18O8	1.21243	0.207195	0.548435	-3.2157	down
Lhjp120709	Dimethyllimettin	Coumarins	C13H14O4	1.33692	0.197682	0.548435	-3.16586	down
pmb1207	O-Feruloyl 3-hydroxycoumarin	Coumarins	C19H14O6	1.39276	0.0424177	0.541992	-3.16004	down
MWSHC20155	Scopoletin (7-Hydroxy-6-methoxycoumarin)	Coumarins	C10H8O4	1.37117	0.135838	0.541992	-3.04626	down
pmb0382	O-Feruloyl 4-hydroxycoumarin	Coumarins	C19H14O6	1.30354	0.117503	0.541992	-2.96802	down
Walp004391	7-C-Glucosylcoumarin	Coumarins	C15H16O7	1.36176	0.0732257	0.541992	-2.88924	down
Lhjp120701	Edgeworic acid	Coumarins	C18H14O7	1.42067	0.071631	0.541992	-2.76367	down
Wagp002962	Umbelliferone 7-O-Rutinoside	Coumarins	C21H26O12	1.45779	0.03847	0.541992	-2.67844	down
Lhqp101805	Skimmin (7-Hydroxycoumarin-7-O-glucoside)	Coumarins	C15H16O8	1.44504	0.0125551	0.541992	-2.67517	down
Lajp003792	Murrayacarpin A glucoside	Coumarins	C17H20O9	1.25834	0.0865602	0.541992	-2.3445	down
MWSslk183	7,8-Dihydroxy-4-phenylcoumarin	Coumarins	C15H10O4	1.22363	0.13765	0.541992	-1.63652	down
HX1362	aesculetine	Coumarins	C9H6O4	1.03612	0.20474	0.548435	-1.46563	down
HX1341	7-hydroxy-2H-1-benzopyran-2-one	Coumarins	C9H6O3	1.17128	0.0986968	0.541992	-1.33841	down
mws1074	Daphnetin	Coumarins	C9H6O4	1.13772	0.151828	0.541992	-1.2322	down
Zbsp004940	6-Hydroxy-7-methoxycoumarin	Coumarins	C10H8O4	1.28049	0.135038	0.541992	-1.19435	down
mws1454	Persicoside	Flavanones	C23H26O11	1.08115	0.419429	0.548435	-9.4571	down
Hmqn003268	5,7,3',4',5'-Pentahydroxydihydroflavone	Flavanones	C15H12O7	1.03728	0.367964	0.548435	-3.56643	down
Lacn006274	Acetyl Phellatin	Flavanones	C28H32O13	1.40844	0.120122	0.541992	-3.49062	down
HJN087	Naringenin-4'-O-glucoside	Flavanones	C21H22O10	1.095	0.285565	0.548435	-3.05261	down
Zbbn005905	Abyssinone II	Flavanones	C20H20O5	1.40283	0.0929797	0.541992	-2.98493	down
Hmmn002588	Eriodictyol-7-O-(2''-O-rhamnosyl)xyloside-4'-O-glucuronide	Flavanones	C32H38O20	1.26175	0.207928	0.548435	-2.68701	down
HJN090	Butin-7-O-glucoside	Flavanones	C21H22O10	1.02205	0.350116	0.548435	-2.62908	down
Layp008369	6,8-Diprenylnaringenin; Lonchocarpol A	Flavanones	C25H28O5	1.13074	0.0815935	0.541992	-1.52354	down
WaYn005089	Neosakuranin	Flavanones	C22H24O10	1.09176	0.2462	0.548435	-1.51567	down
Lacn004858	Phellavin	Flavanonols	C26H32O12	1.36936	0.130002	0.541992	-4.00837	down
mws0914	3,5,7-Trihydroxyflavanone (Pinobanksin)	Flavanonols	C15H12O5	1.00399	0.378258	0.548435	-3.28582	down
Lacp004439	GlucosylPhellamurin	Flavanonols	C32H40O16	1.24201	0.0953957	0.541992	-3.01849	down
Lacn005442	Rhamnosyl Phellamurin	Flavanonols	C32H40O15	1.3373	0.0643101	0.541992	-2.82821	down
pmp000530	Phellodendroside	Flavanonols	C26H30O11	1.21477	0.0353777	0.541992	-2.37799	down
Lmmn004625	Dihydrokaempferol-7-O-glucoside	Flavanonols	C21H22O11	1.02069	0.273491	0.548435	-2.1407	down
Lmzp004885	Tricin (5,7,4'-Trihydroxy-3',5'-dimethoxyflavone)	Flavones	C17H14O7	1.14854	0.412964	0.548435	-9.5932	down
pmp000010	5,7,4',5'-Tetrahydro-3',6-dimethoxyflavone	Flavones	C17H14O8	1.40881	0.348924	0.548435	-7.9064	down
MWSHC20110	8-Methoxyapigenin	Flavones	C16H12O6	1.0749	0.415432	0.548435	-7.40864	down
Zmhp003514	6,7,8-Tetrahydroxy-5-methoxyflavone	Flavones	C16H12O6	1.03313	0.416652	0.548435	-7.14307	down
Hajp007218	5,7,3',5'-tetrahydroxy-6-methylfavanone	Flavones	C16H12O6	1.03022	0.416809	0.548435	-7.1382	down
Smbp004322	Scutevulin	Flavones	C16H12O6	1.05666	0.416109	0.548435	-7.08292	down
Zmjp004795	5,6,7-Tetrahydroxy-8-methoxyflavone	Flavones	C16H12O6	1.03724	0.416208	0.548435	-7.07553	down
Lmjp004941	Rhamnocitrin (7-Methylkaempferol)	Flavones	C16H12O6	1.02636	0.416676	0.548435	-7.0148	down
Zmxp004480	Chrysoeriol-7-O-gentiobioside	Flavones	C28H32O16	1.1468	0.405273	0.548435	-6.91029	down
pmb0603	Chrysoeriol-7,4'-di-O-glucoside	Flavones	C28H32O16	1.04867	0.412382	0.548435	-6.64304	down
Xmyn008071	Gnetifolin B	Flavones	C16H12O6	1.08428	0.411943	0.548435	-6.58336	down
Zmhn003257	5,7,2'-Trihydroxy-8-methoxyflavone	Flavones	C16H12O6	1.0801	0.412091	0.548435	-6.55294	down
mws0058	Diosmetin (5,7,3'-Trihydroxy-4'-methoxyflavone)	Flavones	C16H12O6	1.05958	0.413296	0.548435	-6.55257	down
Lmnp002448	5,7,3',4'-Tetrahydroxy-6-methoxyflavone-8-C-[glucosyl-(1-2)]-glucoside	Flavones	C28H32O17	1.01796	0.410313	0.548435	-6.20353	down
Wagp006311	Gardenin B 5-(6''-Malonyl)Glucoside	Flavones	C28H30O15	1.43011	0.100332	0.541992	-5.39325	down
pma0795	Tricetin-5-O-(6''-malonyl)glucoside	Flavones	C24H22O15	1.41669	0.126422	0.541992	-5.12311	down
Zmhn002912	Viscumneoside III(Homoeriodictyol-7-O-Apiosyl-(1-2)-Glucopyranoside)	Flavones	C27H32O15	1.47171	0.0375437	0.541992	-5.06147	down
Hmcn002875	6-Hydroxyluteolin	Flavones	C15H10O7	1.37989	0.231046	0.548435	-4.9498	down
Wagp005813	5-Hydroxy-7,8,2',3'-Tetramethoxyflavone 5-Glucoside	Flavones	C25H28O12	1.42327	0.16738	0.541992	-4.50912	down
Wagp005210	Gardenin B 5-glucoside	Flavones	C25H28O12	1.43935	0.114901	0.541992	-4.43422	down
Hmcp001628	Limocitrin-3,7-di-O-glucoside	Flavones	C29H34O18	1.37126	0.190061	0.544517	-4.43159	down
Lajp005213	5-hydroxy-7,8,3',4'-tetramethoxyflavone glucoside	Flavones	C25H28O12	1.44892	0.0511484	0.541992	-4.29843	down
Lmqn001795	5-Hydroxy-7-methoxyflavone	Flavones	C16H12O4	1.4092	0.144815	0.541992	-3.70177	down
pmb2997	Chrysoeriol-7-O-Sophoroside-5-O-glucuronide	Flavones	C34H40O22	1.13089	0.359609	0.548435	-3.60612	down
pmb3041	Tricin-7-O-saccharic acid	Flavones	C23H22O14	1.4398	0.122145	0.541992	-3.13526	down
Hmzp006059	Ladanetin	Flavones	C16H12O6	1.36439	0.200629	0.548435	-2.90307	down
Zmgp005070	Centaurein	Flavones	C24H26O13	1.1146	0.229645	0.548435	-2.7644	down
Zbsn005918	Chrysoeriol-7-O-(6''-acetyl)glucoside	Flavones	C24H24O12	1.06387	0.305406	0.548435	-2.11058	down
Hagn003556	7-Benzyloxy-5-hydroxy-3',4'-methylenedioxyflavonoid	Flavones	C23H16O6	1.25739	0.0744484	0.541992	-1.94024	down
Hmzp004605	Ladanetin-6-O-β-D-glucoside	Flavones	C22H22O11	1.02325	0.319785	0.548435	-1.91809	down
MWSHY0031	Apigenin-7-O-glucuronide	Flavones	C21H18O11	1.00367	0.304136	0.548435	-1.83193	down
Wayn004603	Tricetin 3'-glucuronide	Flavones	C21H18O13	1.20124	0.0469464	0.541992	-1.76374	down
MWSmce415	Cirsimaritin (4',5-dihydroxy-6,7-dimethoxyflavone)	Flavones	C17H14O6	1.12015	0.199932	0.548435	-1.75328	down
Hmqp003435	Apigenin-7-O-(2''-O-apiosyl)(6''-Malonyl)glucoside	Flavones	C29H30O17	1.00691	0.23648	0.548435	-1.61894	down
Zbsp003857	3'-O-Methyltricetin-5-O-glucoside	Flavones	C22H22O12	1.06448	0.154993	0.541992	-1.15916	down
Lmyp004081	Isovitexin-2''-O-rhamnoside	Flavones	C27H30O14	1.3759	0.0455891	0.541992	1.27256	up
Hmgp001758	Patuletin-3-O-gentiobioside	Flavonols	C28H32O18	1.09719	0.396819	0.548435	-5.73362	down
mws1326	Herbacetin	Flavonols	C15H10O7	1.38503	0.24358	0.548435	-5.17775	down
Lmdp003808	Azaleatin (5-O-Methylquercetin)	Flavonols	C16H12O7	1.47605	0.113055	0.541992	-5.14222	down
Lmjp002906	Rhamnetin-3-O-Glucoside	Flavonols	C22H22O12	1.444	0.149615	0.541992	-4.28721	down
Hmcp001579	Limocitrin-3-O-sophoroside	Flavonols	C29H34O18	1.24879	0.201435	0.548435	-4.10953	down
pme2954	Quercetin	Flavonols	C15H10O7	1.47892	0.0378862	0.541992	-3.57427	down
HJAP005	Laricitrin-3-O-glucoside	Flavonols	C22H22O13	1.05264	0.318563	0.548435	-3.15481	down
Hmgp001927	Patuletin-7-O-gentiobioside	Flavonols	C28H32O18	1.46359	0.086425	0.541992	-2.80167	down
Lacp003978	GlucosylPhellatin	Flavonols	C32H40O17	1.2828	0.214261	0.548435	-2.6187	down
Lacn005311	Phellatin	Flavonols	C26H30O12	1.21608	0.108915	0.541992	-2.5323	down
Lacn005887	Noricariside	Flavonols	C26H30O12	1.19242	0.109502	0.541992	-2.43926	down
Zmpp002571	3,3',4',5',7-Pentahydroxyflavone; Robinetin	Flavonols	C15H10O7	1.03132	0.335153	0.548435	-2.33584	down
Zbjn005825	Kaempferide-3-O-(6'-O-acetyl)glucoside	Flavonols	C24H24O12	1.06387	0.305406	0.548435	-2.11058	down
Lmqp003647	Herbacetin-3-O-glucuronide	Flavonols	C21H18O13	1.20035	0.0256254	0.541992	-2.07793	down
pmp000117	3,5,6,7,8,3',4'-Heptamethoxyflavone	Flavonols	C22H24O9	1.26317	0.0882367	0.541992	-1.816	down
Lmfn003760	Quercetin-4'-O-glucuronide	Flavonols	C21H18O13	1.08792	0.106328	0.541992	-1.78526	down
Lmcp004624	3-Methylkaempferol	Flavonols	C16H12O6	1.02919	0.214846	0.548435	-1.74872	down
Hmjp003123	Quercetin-5-O-glucuronide	Flavonols	C21H18O13	1.3217	0.0269814	0.541992	-1.60887	down
Lmcp003788	Isotamarixin	Flavonols	C22H22O12	1.0485	0.186576	0.542451	-1.01399	down
MWS20189	Tectorigenin	Isoflavones	C16H12O6	1.03561	0.416342	0.548435	-7.08076	down
Lssp210437	5,7,4'-Trihydroxy-3'-methoxyisoflavone; 3'-O-Methylorobol	Isoflavones	C16H12O6	1.02841	0.416728	0.548435	-7.02243	down
Lmhn004976	Aracarpene 2	Isoflavones	C16H12O6	1.07545	0.412358	0.548435	-6.55983	down
HJN089	Sophoricoside	Isoflavones	C21H20O10	1.23869	0.271196	0.548435	-2.83453	down
Zmdp006307	sanshodiol	Lignans	C20H22O6	1.47464	0.0904546	0.541992	-5.4004	down
Hmlp003129	Matairesinol	Lignans	C20H22O6	1.46858	0.0915491	0.541992	-5.26784	down
Lazn003893	Erythro-Guaiacylglycerol-β-Coniferyl Ether	Lignans	C20H24O7	1.44859	0.149824	0.541992	-5.1187	down
Lmnn004130	Lappaol C	Lignans	C30H34O10	1.47892	0.0855105	0.541992	-4.94475	down
Hmzn004430	Sesamolinol 4'-O-β-D-Glucosyl (1→6)-O-β-D-Glucoside	Lignans	C32H40O17	1.43025	0.19616	0.548435	-4.70332	down
Rfmb25702	Pinoresinol-4-O-(6''-acetyl)glucoside	Lignans	C28H34O12	1.41288	0.173663	0.541992	-4.58414	down
MWSHC20189	Epipinoresinol	Lignans	C20H22O6	1.36243	0.234575	0.548435	-4.39245	down
mws0097	Pinoresinol	Lignans	C20H22O6	1.35219	0.239208	0.548435	-4.29829	down
Yxxp005044	Balanophonin	Lignans	C20H20O6	1.47091	0.0766433	0.541992	-4.20581	down
Lhhp102923	(7'R,8'R)-7'8'-dihydro-7'-(5'-hydroxy-3'-methoxphenyl)-3-methoxy-8'-methyl-1-(E)-propenylbenzof-uran	Lignans	C20H22O4	1.41222	0.0630089	0.541992	-4.11236	down
Zahn005590	(7'S,8R,8'R)-3,5'-dimethoxy-3',4,9'-trihydroxy-7',9-epoxy-8,8'-lignan	Lignans	C20H24O6	1.35708	0.181864	0.542451	-4.11142	down
Zmcn003729	1-Hydroxypinoresinol-4'-O-Glucoside	Lignans	C26H32O12	1.39478	0.139037	0.541992	-4.02645	down
Lskp211249	epieudesmin	Lignans	C22H26O6	1.47272	0.137669	0.541992	-3.97973	down
Hmgn004693	8-Hydroxy-α-conidendrin	Lignans	C20H20O7	1.47211	0.0619364	0.541992	-3.93818	down
Wbwn005757	(2r,3r,4s)-6-hydroxy-4-(4-hydroxy-3-methoxyphenyl)-7-methoxy-2,3-dimethyl-3,4-dihydro-2h-naphthalen-1-one	Lignans	C20H22O5	1.37018	0.177492	0.541992	-3.90239	down
Hmln001931	Matairesinol-4,4'-O-diglucoside	Lignans	C32H42O16	1.40502	0.121784	0.541992	-3.78769	down
Salp005796	Fraxiresinol	Lignans	C21H24O8	1.41726	0.147138	0.541992	-3.75533	down
Zblp005947	Styraxjaponoside B	Lignans	C27H34O11	1.36172	0.00194125	0.38097	-3.658	down
pmp000682	Matairesinol-4'-O-glucoside (Matairesinoside)	Lignans	C26H32O11	1.40409	0.140556	0.541992	-3.63314	down
Zmcp102702	Saikolignanoside A	Lignans	C26H34O11	1.45272	0.0549198	0.541992	-3.62251	down
Hmgn004139	Isohydroxymatairesinol	Lignans	C20H22O7	1.2643	0.256437	0.548435	-3.61724	down
Wbmp004309	Vitexdoin C	Lignans	C19H16O5	1.33226	0.176237	0.541992	-3.58562	down
Lazn006735	Erythro-Guaiacylglycerol-β-O-4'-dehydrodisinapyl Ether	Lignans	C31H36O11	1.41022	0.0223255	0.541992	-3.5541	down
WaYn003112	Erythro-Guaiacylglycerol-β-threo-syringylglycerol Ether	Lignans	C21H28O10	1.43962	0.128308	0.541992	-3.53806	down
Hmzn005420	Sesamolinol-glucoside	Lignans	C26H30O12	1.44248	0.103074	0.541992	-3.52552	down
Lhnp111727	Vladinol D	Lignans	C20H22O7	1.39334	0.123634	0.541992	-3.46926	down
Jmzn003632	Manglieside D	Lignans	C26H34O11	1.3539	0.224452	0.548435	-3.39489	down
pmn001378	Pinoresinol-4-O-glucoside	Lignans	C26H32O11	1.47306	0.0694648	0.541992	-3.33444	down
Hmln002355	5'-Methoxymatairesinoside	Lignans	C27H34O12	1.08827	0.305737	0.548435	-3.31339	down
Lcsn000192	indigoticoside A	Lignans	C32H44O16	1.04581	0.354964	0.548435	-3.26912	down
Smjp003858	taiwanin H	Lignans	C20H16O7	1.36896	0.104243	0.541992	-3.26886	down
Lhbp111734	Isolariciresinol	Lignans	C20H24O6	1.49163	0.0260122	0.541992	-3.25901	down
Lafp006517	Arctigenin	Lignans	C21H24O6	1.41707	0.123461	0.541992	-3.11737	down
Labn005411	Urolignoside	Lignans	C26H34O11	1.1203	0.212207	0.548435	-2.95004	down
Yarn004381	Tortoside B	Lignans	C28H38O13	1.36869	0.079214	0.541992	-2.85301	down
Wbmp005319	Vitexdoin D	Lignans	C19H16O6	1.4849	0.0330871	0.541992	-2.7853	down
pmn001375	1-Hydroxypinoresinol-1-O-Glucoside	Lignans	C26H32O12	1.40035	0.1088	0.541992	-2.7682	down
Jmwn006041	Dehydrodiconiferylalcohol-9'-O-glucoside	Lignans	C26H32O11	1.21661	0.11559	0.541992	-2.66969	down
Rfmb056	Medioresinol-4'-O-(6'''-acetyl)glucoside	Lignans	C29H36O13	1.46762	0.0285323	0.541992	-2.64582	down
Lmyn006453	Demethyl-Anhydrosecoisolariciresinol	Lignans	C19H22O5	1.25869	0.146521	0.541992	-2.60021	down
Zmdn003762	Isosyringinoside	Lignans	C23H34O14	1.37028	0.123613	0.541992	-2.54671	down
Qatp006104	Machilin G	Lignans	C21H24O5	1.36766	0.106492	0.541992	-2.53197	down
Hmln002100	Nortrachelogenin-4-O-glucoside	Lignans	C26H32O12	1.40409	0.0492189	0.541992	-2.40718	down
Hmgn002833	4-Ketopinoresinol	Lignans	C20H20O7	1.3186	0.169714	0.541992	-2.33386	down
pmn001501	Fargesin	Lignans	C21H22O6	1.02183	0.30283	0.548435	-2.3189	down
Lmsp004450	Dehydrodiconiferyl alcohol	Lignans	C20H22O6	1.47972	0.0225915	0.541992	-2.29072	down
Lazn003996	Erythro-Guaiacylglycerol-β-dihydroconiferyl Ether	Lignans	C20H26O7	1.42308	0.0750918	0.541992	-2.19051	down
pmp000674	Phillygenin	Lignans	C21H24O6	1.39345	0.0926708	0.541992	-2.16279	down
Lmyn003971	Dihydrodehydrodiconiferyl alcohol-4-O-glucoside	Lignans	C26H34O11	1.36693	0.0408815	0.541992	-2.06689	down
Wbwp006397	(3r,4r)-3-(2h-1,3-benzodioxol-5-ylmethyl)-4-[(4-hydroxy-3-methoxyphenyl)methyl]oxolan-2-one	Lignans	C20H20O6	1.22792	0.213913	0.548435	-2.01917	down
MWS20158	Pinoresinol-4,4'-O-diglucoside	Lignans	C32H42O16	1.25884	0.190803	0.544657	-2.01054	down
Lhhp102904	Horsfieldin	Lignans	C20H20O6	1.19852	0.226159	0.548435	-2.00159	down
HJN083	Lariciresinol-4'-O-glucoside	Lignans	C26H34O11	1.46512	0.0224755	0.541992	-1.97099	down
Lskp211385	dihydrosesamin	Lignans	C20H20O6	1.19931	0.219429	0.548435	-1.95934	down
Hmln002161	Trachelogenin-4'-O-gentiobioside	Lignans	C33H44O17	1.15536	0.22622	0.548435	-1.93225	down
Lmdn001925	Olivil-4'-O-glucoside	Lignans	C26H34O12	1.13006	0.129818	0.541992	-1.90161	down
Zmdn003480	Cycloolivil-6-O-glucoside	Lignans	C26H34O12	1.06487	0.169387	0.541992	-1.89814	down
pmn001372	Medioresinol-4,4'-di-O-glucoside	Lignans	C33H44O17	1.24332	0.0159374	0.541992	-1.87858	down
Lmmn002274	Isolariciresinol-9'-O-glucoside	Lignans	C26H34O11	1.40673	0.00101522	0.38097	-1.86457	down
Lssp210086	Balanophonin B	Lignans	C20H20O7	1.21264	0.147048	0.541992	-1.66362	down
Wbwn006953	Cagayanone A	Lignans	C20H18O5	1.28355	0.0832693	0.541992	-1.45667	down
Wbwp006279	(6R,7R,8R)-8-(1,3-benzodioxol-5-yl)-6-hydroxy-6,7-dimethyl-7,8-dihydrobenzo[f][1,3]benzodioxol-5-one	Lignans	C20H18O6	1.08225	0.13043	0.541992	-1.3217	down
Wbwp006280	2,5-Bis(1,3-benzodioxol-5-yl)-3,4-dimethyloxolane-2,3-diol	Lignans	C20H20O7	1.41051	0.0192659	0.541992	-1.17593	down
mws2162	Schisandrin; Schizandrin; Schizandrol A	Lignans	C24H32O7	1.01213	0.223709	0.548435	-1.09142	down
Wbtn007603	9,11-dimethoxy-2h-[1,3]dioxolo[4,5-b]xanthen-10-one	Other Flavonoids	C16H12O6	1.06593	0.413325	0.548435	-6.63056	down
Lamn004579	3-(3,4-dihydroxybenzyl)-5,7-dihydroxy-6-methoxychroman-4-one diglucoside	Other Flavonoids	C29H36O17	1.01544	0.409612	0.548435	-6.46515	down
Hmdp001950	2',7-Dihydroxy-3',4'-dimethoxyisoflavan	Other Flavonoids	C17H18O5	1.37527	0.169796	0.541992	-5.07626	down
Hmgp003423	1,3,6,8-Tetrahydroxy-2,7-Dimethoxyxanthone	Other Flavonoids	C15H12O8	1.33583	0.204425	0.548435	-3.99174	down
Zbdn007423	6,7-Dimethoxy-4-chromanone	Other Flavonoids	C11H12O4	1.39072	0.138462	0.541992	-3.02867	down
Lamp006750	3-[(3,4-dihydroxyphenyl)methylidene]-5,7-dihydroxy-6-methoxy-2h-1-benzopyran-4-one malonyl glucoside	Other Flavonoids	C26H26O15	1.26455	0.249516	0.548435	-2.50389	down
pmp001007	1,7-Dihydroxy-2,3-dimethoxyxanthone	Other Flavonoids	C15H12O6	1.18585	0.17081	0.541992	-1.99818	down
mws1153	2'-Acetylacteoside	Phenolic acids	C31H38O16	1.2929	0.309864	0.548435	-6.4522	down
Sacn003282	10-hydroxymajoroside	Phenolic acids	C17H24O11	1.50387	0.0170338	0.541992	-5.65831	down
mws1150	Echinacoside	Phenolic acids	C35H46O20	1.35557	0.230348	0.548435	-5.64191	down
Zmhn002334	6-O-Feruloyl-β-D-glucose	Phenolic acids	C16H20O9	1.45818	0.124394	0.541992	-5.58256	down
Wchn003509	Syringoyl-D-Glucose	Phenolic acids	C15H20O10	1.20772	0.185099	0.542451	-5.13674	down
Lmnn002886	1'-O-(3,4-Dihydroxyphenethyl)-O-caffeoyl-glucoside	Phenolic acids	C23H26O11	1.4983	0.0826049	0.541992	-5.04653	down
Qaxp004683	Arillatose B	Phenolic acids	C22H30O14	1.48236	0.0402142	0.541992	-5.01049	down
Lakp003115	5-O-β-D-Glucopyranosyl-3-hydrobenzo(b)fu-ran-2-one	Phenolic acids	C14H16O8	1.48614	0.0400153	0.541992	-4.95408	down
Lmjn005433	Rosmarinic acid methyl ester	Phenolic acids	C19H18O8	1.49966	0.0428055	0.541992	-4.92741	down
pme0422	Isoferulic Acid	Phenolic acids	C10H10O4	1.3942	0.178132	0.541992	-4.85978	down
Lmdn002671	Purpureaside C	Phenolic acids	C35H46O20	1.31248	0.255489	0.548435	-4.84181	down
Zbjp002681	1,7-bis(4-hydroxy-3-methoxyphenyl)hept-1-ene-3-ol	Phenolic acids	C21H26O5	1.49106	0.0674263	0.541992	-4.71626	down
Zbln004575	Tetrahydrorengyoxide-glucose-caffeoyl	Phenolic acids	C23H26O11	1.47199	0.0850595	0.541992	-4.71245	down
Wdtp003528	3,4,5-trihydroxy-6-[4-[[(2R)-5-oxooxolan-2-yl]methyl]phenoxy]oxane-2-carboxylic acid	Phenolic acids	C17H20O9	1.49475	0.0520074	0.541992	-4.66701	down
Lckn000311	3-hydroxy-4-methoxy-β-phenylethoxy-O-α-L-rhamnopyranosyl-(1→3)-4-O-feruloyl(trans)-β-D-glucopyranoside	Phenolic acids	C31H40O15	1.5134	0.00604367	0.541992	-4.66101	down
mws4085	Sinapic acid	Phenolic acids	C11H12O5	1.40776	0.136037	0.541992	-4.62982	down
Lmdn004491	Martynoside	Phenolic acids	C31H40O15	1.51257	0.00896299	0.541992	-4.57993	down
Lmbn002648	α-Hydroxycinnamic Acid	Phenolic acids	C9H8O3	1.17862	0.271009	0.548435	-4.57597	down
mws1506	Plantamajoside	Phenolic acids	C29H36O16	1.42049	0.149896	0.541992	-4.55565	down
pmb3317	Quinacyl syringic acid	Phenolic acids	C16H20O10	1.50259	0.0251691	0.541992	-4.52993	down
Lmmn001643	2-Hydroxycinnamic acid	Phenolic acids	C9H8O3	1.14657	0.281442	0.548435	-4.51367	down
pme3083	2-(Formylamino)benzoic acid	Phenolic acids	C8H7NO3	1.1773	0.272179	0.548435	-4.49794	down
Cmdn004031	R-Campneoside II	Phenolic acids	C29H36O16	1.40359	0.15934	0.541992	-4.49419	down
mws0014	Ferulic acid	Phenolic acids	C10H10O4	1.36505	0.165351	0.541992	-4.45432	down
Lckn000312	3,4-dihydroxy-β-phenylethoxy-O-α-L-rhamnopyranosyl(1→3)-6-O-caffeoyl(cis)-β-D-glucopyranoside	Phenolic acids	C29H36O15	1.3734	0.167499	0.541992	-4.424	down
mws1720	Forsythiaside A	Phenolic acids	C29H36O15	1.3856	0.155912	0.541992	-4.38753	down
Hmln003092	Isoforsythoside A	Phenolic acids	C29H36O15	1.38823	0.155613	0.541992	-4.37087	down
mws2212	Caffeic acid	Phenolic acids	C9H8O4	1.22953	0.177208	0.541992	-4.35749	down
Hmpp003343	1,7-Bis(4-Hydroxy-3-Methoxyphenyl)Hepta-4,6-Dien-3-One	Phenolic acids	C21H22O5	1.4803	0.0787628	0.541992	-4.32578	down
Zbjp003269	7-(3,4-dimethoxyphenyl)-1-(4-hydroxyphenyl)hept-1-ene-3,5-dione	Phenolic acids	C21H22O5	1.48949	0.0642705	0.541992	-4.32121	down
Wdtp003420	3,4,5-Trihydroxy-6-[[3-(4-methoxyphenyl)oxiran-2-yl]methoxy]oxane-2-carboxylic acid	Phenolic acids	C16H20O9	1.30845	0.152074	0.541992	-4.2673	down
Hmgn001278	Verbasoside	Phenolic acids	C20H30O12	1.35594	0.271972	0.548435	-4.24247	down
Sakn004146	Chiritoside B	Phenolic acids	C29H36O16	1.45586	0.107815	0.541992	-4.23049	down
Hmsn002272	Demethyl coniferin	Phenolic acids	C15H20O8	1.45491	0.0701416	0.541992	-4.22266	down
Yphn003868	plantalloside	Phenolic acids	C29H36O16	1.4292	0.117228	0.541992	-4.21368	down
Lmhn003802	Sinapoylsinapoyltartaric acid	Phenolic acids	C26H26O14	1.09442	0.320398	0.548435	-4.21138	down
MWSmce467	4-Allylcatechol	Phenolic acids	C9H10O2	1.15342	0.225337	0.548435	-4.2013	down
Wmcn000039	decaffeoylverbascoside	Phenolic acids	C20H30O12	1.36452	0.263559	0.548435	-4.11889	down
Lmhn003074	Feruloylmalic acid	Phenolic acids	C14H14O8	1.19624	0.21448	0.548435	-4.03403	down
Zbln005846	((3R,4R,5R)-3,4-dihydroxy-5-(((2S,3R,4R,5S,6S)-3,4,5-trihydroxy-6-(4-hydroxyphenethoxy)tetrahydro-2H-pyran-2-yl)methoxy)tetrahydrofuran-3-yl)methyl(E)-3-(4-hydroxyphenyl)acrylate	Phenolic acids	C28H34O13	1.39373	0.182623	0.542451	-4.02031	down
Zmxn003874	7,8-Dihydro-Buddlenol B(threo)	Phenolic acids	C31H38O11	1.42817	0.083666	0.541992	-3.98273	down
MWSmce248	3-Hydroxycinnamic Acid	Phenolic acids	C9H8O3	1.17703	0.275311	0.548435	-3.90349	down
pmn001554	Petasiphenone	Phenolic acids	C17H14O7	1.4115	0.147568	0.541992	-3.85371	down
pme1439	p-Coumaric acid	Phenolic acids	C9H8O3	1.18355	0.274246	0.548435	-3.75509	down
mws0467	3-(4-Hydroxyphenyl)-propionic acid	Phenolic acids	C9H10O3	1.17825	0.273754	0.548435	-3.71168	down
Zmxn004029	7,8-Dihydro-Buddlenol B(erythro)	Phenolic acids	C31H38O11	1.39995	0.137919	0.541992	-3.70897	down
MWSCX017	4-hydroxyphenyl acrylaldehyde	Phenolic acids	C9H8O3	1.17982	0.21894	0.548435	-3.70074	down
MWSHC20125	5-O-Caffeoylshikimic acid	Phenolic acids	C16H16O8	1.17506	0.185327	0.542451	-3.66235	down
Lmcp101903	Desrhamnosylisoacteoside	Phenolic acids	C23H26O11	1.46461	0.0774955	0.541992	-3.60225	down
MWSCX015	Caffeic aldehyde	Phenolic acids	C9H8O3	1.16062	0.230975	0.548435	-3.59805	down
Zaln004057	4-caffeoylshikimic acid	Phenolic acids	C16H16O8	1.17367	0.185094	0.542451	-3.59512	down
Hmbn002692	6'-O-Feruloyl-D-sucrose	Phenolic acids	C22H30O14	1.43477	0.068403	0.541992	-3.57733	down
pmn001710	Rosmarinic acid-3'-O-glucoside	Phenolic acids	C24H26O13	1.43856	0.0986043	0.541992	-3.55901	down
Lhhp120814	Eugenol	Phenolic acids	C10H12O2	1.15677	0.235287	0.548435	-3.50172	down
pmn001384	Isochlorogenic acid C	Phenolic acids	C25H24O12	1.35984	0.000200931	0.157731	-3.5001	down
Zaln004082	3-O-caffeoylshikimic acid	Phenolic acids	C16H16O8	1.17559	0.186213	0.542451	-3.49427	down
Zbfn002169	3'-p-Coumaroyl-sucrose	Phenolic acids	C21H28O13	1.17661	0.210377	0.548435	-3.42819	down
Zbfn006009	2-Feruloyl-6-(4-hydroxycinnamoyl)glucoside	Phenolic acids	C25H26O11	1.28652	0.109145	0.541992	-3.40017	down
mad2394	Sinapoyl-p-coumaroyltartaric acid	Phenolic acids	C24H22O12	1.34406	0.115504	0.541992	-3.18061	down
Jmwn004308	4-Dihydroxyphenethoxy-8-O-[6-O-(4-O-glucosyl)feruloyl]glucoside	Phenolic acids	C30H38O15	1.38014	0.118584	0.541992	-3.1636	down
Haxp004538	Acteoside; Verbascoside	Phenolic acids	C29H36O15	1.19921	0.212147	0.548435	-3.12982	down
Zbln004255	2-(3-Hydroxy-4-methoxyphenethyl)-5-O-(2-hydroxycaffeoyl)-gentiobioside	Phenolic acids	C30H38O16	1.34254	0.0922987	0.541992	-3.10886	down
MWSmce581	2,4-Dihydroxybenzaldehyde	Phenolic acids	C7H6O3	1.22525	0.15454	0.541992	-3.07755	down
Lmhn002051	Vnilloylmalic acid	Phenolic acids	C12H12O8	1.34981	0.167581	0.541992	-2.99538	down
Hmgp001944	Isoacteoside	Phenolic acids	C29H36O15	1.24276	0.198668	0.548435	-2.97172	down
mws1212	Ferulic acid methyl ester	Phenolic acids	C11H12O4	1.42751	0.0848032	0.541992	-2.95462	down
Zmhn001358	4-O-Glucosyl-4-hydroxybenzoic acid	Phenolic acids	C13H16O8	1.41349	0.147922	0.541992	-2.90829	down
Lmcp101902	Desrhamnosylacteoside	Phenolic acids	C23H26O11	1.20455	0.195688	0.548435	-2.80708	down
mws0093	Coniferyl alcohol	Phenolic acids	C10H12O3	1.40798	0.0907641	0.541992	-2.80134	down
Li512115	Isochlorogenic acid B	Phenolic acids	C25H24O12	1.33221	0.0608921	0.541992	-2.75184	down
Wbmn005986	Isomartynoside	Phenolic acids	C31H40O15	1.41378	0.0613066	0.541992	-2.71939	down
mws0612	3,4-Dimethoxyphenyl acetic acid	Phenolic acids	C10H12O4	1.42825	0.0805482	0.541992	-2.7122	down
WaYn004134	Salirepin 6'-O-Caffeate	Phenolic acids	C22H24O11	1.36701	0.13069	0.541992	-2.70714	down
Zbjp002910	1,7-bis(4-hydroxy-3-methoxyphenyl)hept-6-ene-3-one	Phenolic acids	C21H24O5	1.44817	0.0469088	0.541992	-2.67153	down
pmn001459	Sibiricose A6	Phenolic acids	C23H32O15	1.37573	0.124844	0.541992	-2.66688	down
Lmbn004847	4-Methoxyphenylpropionic acid	Phenolic acids	C10H12O3	1.32301	0.113567	0.541992	-2.63362	down
Jmzp004026	Magnoloside A	Phenolic acids	C29H36O15	1.35126	0.102518	0.541992	-2.57202	down
Zmhn001793	6-O-Caffeoyl-D-glucose	Phenolic acids	C15H18O9	1.33172	0.167816	0.541992	-2.57028	down
Lmxp001668	2-Methoxy-4-ethenylphenol	Phenolic acids	C9H10O2	1.33347	0.165634	0.541992	-2.51948	down
Lakn003296	Acetyl-2-β-D-glucopyranosyloxy-5-hydroxy-phenylacetic acid	Phenolic acids	C16H20O10	1.19269	0.171319	0.541992	-2.50864	down
Lmhn003801	Feruloylsinapoyltartaric acid	Phenolic acids	C25H24O13	1.15099	0.0405869	0.541992	-2.50299	down
Zbfn006124	2,6-Di-Feruloyl glucoside	Phenolic acids	C26H28O12	1.15293	0.0488352	0.541992	-2.50045	down
Lmtn002233	Androsin	Phenolic acids	C15H20O8	1.32072	0.128484	0.541992	-2.45982	down
pmn001320	1-O-p-Cumaroylglycerol	Phenolic acids	C12H14O5	1.2583	0.157955	0.541992	-2.41597	down
Zbfn005854	2,6-Di-(4-hydroxycinnamoyl)glucoside	Phenolic acids	C24H24O10	1.19354	0.213673	0.548435	-2.36032	down
pma3724	1-O-Feruloylquinic acid	Phenolic acids	C17H20O9	1.25834	0.0865602	0.541992	-2.3445	down
pmb3066	5-O-p-Coumaroylshikimic acid O-glucoside	Phenolic acids	C22H26O12	1.39808	0.0834064	0.541992	-2.34395	down
HJN037	3,5-Dihydroxy-4-methoxybenzoic acid; 4-O-Methylgallic Acid	Phenolic acids	C8H8O5	1.26418	0.218391	0.548435	-2.33855	down
Lmqp002761	Alnusonol	Phenolic acids	C19H20O4	1.44081	0.0839382	0.541992	-2.3197	down
Lmgp002593	3-hydroxybenzaldehyde	Phenolic acids	C7H6O2	1.28332	0.106877	0.541992	-2.3127	down
mws1195	p-Coumaric acid methyl ester	Phenolic acids	C10H10O3	1.13588	0.171066	0.541992	-2.29057	down
Hmmn002544	Ferulic acid-4-O-glucoside	Phenolic acids	C16H20O9	1.26607	0.157549	0.541992	-2.28848	down
MWS2099	4-Methylbenzoic acid	Phenolic acids	C8H8O2	1.33716	0.146346	0.541992	-2.27232	down
Zbln005189	2-(3,4-Dihydroxyphenethyl)-5-O-Cinnamoyl-gentiobioside	Phenolic acids	C29H36O14	1.26252	0.141273	0.541992	-2.22307	down
Wafn002827	Dihydroferulic acid glucoside	Phenolic acids	C16H22O9	1.30801	0.125467	0.541992	-2.20928	down
mws0906	Coniferin	Phenolic acids	C16H22O8	1.31555	0.081544	0.541992	-2.20197	down
Ymjm000116	6-O-Acetylarbutin	Phenolic acids	C14H18O8	1.32338	0.0320744	0.541992	-2.14762	down
Hmtn001302	Glucosyloxybenzoic acid	Phenolic acids	C13H16O8	1.28949	0.161137	0.541992	-2.12963	down
Zmhn001926	Salicylic acid O-glycoside	Phenolic acids	C13H16O8	1.27278	0.174918	0.541992	-2.11754	down
pmn001672	Furanofructosyl-α-D-(3-mustard acyl)glucoside	Phenolic acids	C23H32O15	1.39194	0.097755	0.541992	-2.11092	down
Zbfn002690	1-(4-Hydroxybenzoyl)Glucose; 25545-07-7	Phenolic acids	C13H16O8	1.19777	0.11095	0.541992	-2.07955	down
Zmhn002422	1-O-Feruloyl-β-D-glucose	Phenolic acids	C16H20O9	1.22975	0.111256	0.541992	-2.06248	down
MWSprf147	Glucovanillin	Phenolic acids	C14H18O8	1.45514	0.0116219	0.541992	-2.02408	down
Sacn004878	Orobanchoside	Phenolic acids	C29H36O16	1.43413	0.0720097	0.541992	-1.98481	down
pmn001468	Sibiricose A3	Phenolic acids	C19H26O13	1.42113	0.00428256	0.541992	-1.97002	down
MWS4301	3-hydroxyphenylacetic acid	Phenolic acids	C8H8O3	1.32751	0.126068	0.541992	-1.96288	down
Lmsn002548	1-O-Caffeoyl-β-D-glucose	Phenolic acids	C15H18O9	1.38643	0.069135	0.541992	-1.92739	down
MWSmce370	4-Hydroxyphenylacetic acid	Phenolic acids	C8H8O3	1.34666	0.0946271	0.541992	-1.89792	down
Lmsn003628	6'-O-Sinapoylsucrose	Phenolic acids	C23H32O15	1.2335	0.187554	0.542916	-1.8892	down
Hmgn002038	β-Oxoacteoside	Phenolic acids	C29H34O16	1.39856	0.0820849	0.541992	-1.88502	down
Wcdp009119	Elaidolinolenic acid	Phenolic acids	C18H30O2	1.27768	0.159582	0.541992	-1.84786	down
MWSHC2062	Ferulic β-glucoside	Phenolic acids	C16H20O9	1.29328	0.0139735	0.541992	-1.76639	down
Sacn004532	plantainoside B	Phenolic acids	C23H26O11	1.18837	0.0655077	0.541992	-1.65826	down
Wmzn002116	3,5-Dicaffeoylquinic acid	Phenolic acids	C25H24O12	1.19798	0.15935	0.541992	-1.6409	down
MWS3046	3-(3-Hydroxyphenyl)-3-hydroxypropanoic acid	Phenolic acids	C9H10O4	1.11874	0.161336	0.541992	-1.58825	down
mws0028	Vanillic acid	Phenolic acids	C8H8O4	1.27202	0.124207	0.541992	-1.58647	down
mws0885	2,4-Dihydroxybenzoic acid	Phenolic acids	C7H6O4	1.37068	0.017618	0.541992	-1.56499	down
MWS5206	4-Hydroxyphenyllactic Acid	Phenolic acids	C9H10O4	1.43518	0.00356336	0.541992	-1.54936	down
Lmrn001951	2-Hydroxy-3-(4-Hydroxyphenyl)Propanoic Acid	Phenolic acids	C9H10O4	1.44914	0.00166651	0.38097	-1.48631	down
pmn001671	Furanofructosyl-α-D-(6-mustard acyl)glucoside	Phenolic acids	C23H32O15	1.22115	0.176661	0.541992	-1.46228	down
MWSslk066	3-Hydroxy-4-methoxybenzoic acid; Isovanillic Acid	Phenolic acids	C8H8O4	1.27399	0.115673	0.541992	-1.43546	down
Hmbp003234	1-O-Caffeoylglycerol	Phenolic acids	C12H14O6	1.3453	0.0382834	0.541992	-1.42619	down
NK10252689	2-Methoxy-5-nitrophenol	Phenolic acids	C7H7NO4	1.06148	0.268669	0.548435	-1.42186	down
mws1078	Anthranilic Acid	Phenolic acids	C7H7NO2	1.36856	0.0865376	0.541992	-1.40414	down
Hmtn001288	Methyl 2,4-dihydroxyphenylacetate	Phenolic acids	C9H10O4	1.40711	0.0343437	0.541992	-1.40274	down
Lmzn001582	5'-Glucosyloxyjasmanic acid	Phenolic acids	C18H28O9	1.26182	0.0971696	0.541992	-1.40157	down
Hmln002996	β-Hydroxyacteoside	Phenolic acids	C29H36O16	1.18541	0.079361	0.541992	-1.36955	down
Zmgn001989	3-Methylcatechol	Phenolic acids	C7H8O2	1.39473	0.0680277	0.541992	-1.33519	down
MWS1848	Phenyl acetate	Phenolic acids	C8H8O2	1.0463	0.186171	0.542451	-1.32029	down
Lmsn002288	1-O-Caffeoyl-(6-O-glucosyl)-β-D-glucose	Phenolic acids	C21H28O14	1.14423	0.115986	0.541992	-1.31532	down
mws0853	Sinapyl alcohol	Phenolic acids	C11H14O4	1.26828	0.0326839	0.541992	-1.31142	down
MWSmce466	4-Hydroxyacetophenone	Phenolic acids	C8H8O2	1.075	0.182076	0.542451	-1.30894	down
Lmhn001477	2-Caffeoyl-L-tartaric acid (Caftaric acid)	Phenolic acids	C13H12O9	1.30879	0.0080211	0.541992	-1.30867	down
MWS20194	Cinnamic acid	Phenolic acids	C9H8O2	1.0657	0.150488	0.541992	-1.28735	down
Wdtp003242	methyl-4,5-diacetyloxy-6-[4-(hydroxymethyl)phenoxy]-3-methyloxane-2-carboxylate	Phenolic acids	C19H24O9	1.27834	0.124901	0.541992	-1.18819	down
Sacn002893	10-acetylmonomelittoside	Phenolic acids	C17H24O11	1.08201	0.233012	0.548435	-1.1482	down
MWSmce294	Elemicin	Phenolic acids	C12H16O3	1.34396	0.0770042	0.541992	-1.13417	down
Zmgn004894	Methyl 4-hydroxybenzoate	Phenolic acids	C8H8O3	1.36606	0.0273083	0.541992	1.02555	up
Lmtn002671	3-O-Methylgallic Acid	Phenolic acids	C8H8O5	1.13625	0.0733782	0.541992	1.07193	up
Wcdn001606	Leonuriside A	Phenolic acids	C14H20O9	1.12635	0.176977	0.541992	1.12357	up
Zmln000668	Monogalloyl-diglucose	Phenolic acids	C19H26O15	1.34052	0.0605866	0.541992	1.18528	up
Lmtn002324	Benzyl-(2''-O-glucosyl)glucoside	Phenolic acids	C19H28O11	1.30513	0.0273724	0.541992	1.31617	up
Lmdp003146	Rhododendrol	Phenolic acids	C10H14O2	1.30626	0.113923	0.541992	1.39857	up
pmp000086	1-Feruloyl-sn-glycerol	Phenolic acids	C13H16O6	1.02848	0.268489	0.548435	1.51151	up
pmp000087	2-Feruloyl-sn-glycerol	Phenolic acids	C13H16O6	1.13789	0.121352	0.541992	1.69545	up
Wayn004109	3'-O-Methylellagic acid 4-O-beta-D-glucoside	Tannin	C21H18O13	1.0695	0.135346	0.541992	-1.16916	down

## Sheet: Table S5
Table S5. Summary of the high-quality transcriptome sequencing data.
Samples	Raw_read	Clean_read	Clean_base	Q20 (%)	Q30 (%)	Total mapping ratio (%)	Uniquely mapping ratio (%)
HA10_1	45.44	43.42	6.51	97.46	92.4	97.75	95.04
HA10_2	45.44	43.45	6.52	97.16	91.69	97.8	95.26
HA10_3	43.69	42.21	6.33	97.56	92.78	97.95	95.39
HA20_1	45.44	43.58	6.54	97.66	93.09	97.76	95.32
HA20_2	45.44	43.61	6.54	97.42	92.45	97.95	95.8
HA20_3	45.44	43.32	6.5	97.34	92.31	97.8	95.82
HA30_1	45.44	43.45	6.52	97.48	92.51	97.97	95.73
HA30_2	43.69	41.94	6.29	97.66	92.97	97.98	96.06
HA30_3	43.69	42.19	6.33	97.3	91.91	98.13	95.82
LA10_1	45.44	43.38	6.51	97.38	92.35	97.83	95.32
LA10_2	45.44	43.48	6.52	97.44	92.5	97.86	95.25
LA10_3	45.44	43.37	6.51	97.42	92.48	97.74	95.43
LA20_1	43.69	42.07	6.31	97.22	91.77	98.06	95.95
LA20_2	43.69	42.01	6.3	97.24	92	97.95	95.83
LA20_3	43.69	42.04	6.31	97.03	91.2	98.18	96.1
LA30_1	45.44	43.22	6.48	97.44	92.38	97.77	95.75
LA30_2	43.69	41.95	6.29	97.4	92.26	97.97	95.95
LA30_3	43.69	41.95	6.29	97.4	92.35	97.91	95.84

## Sheet: Table S6
Table S6. List of the 49 key differentially expressed transcription factor-related genes.
gene_id	tf_family	log2fc_LA10-vs-HA10	log2fc_LA20-vs-HA20	log2fc_LA30-vs-HA30
SINPZ0900373	NAC	-4.00029	3.32542	-2.36346
SINPZ0300059	GRAS	-1.06779	-1.03251	1.04109
SINPZ0200044	bHLH	-4.71123	-1.55026	-1.04155
SINPZ0801455	MADS	-10.5182	-6.88241	-8.20709
SINPZ0000556	PLATZ	1.22102	2.58561	2.18876
SINPZ0102190	MYB	-1.1951	-1.04926	4.3083
SINPZ0400346	NAC	-1.1652	1.96517	3.44073
SINPZ0101424	WRKY	-2.48689	1.57406	1.54789
SINPZ0500871	C3H	6.85527	7.73393	9.48954
SINPZ0501321	PLATZ	-4.03026	-2.33022	-2.48846
SINPZ0000322	Trihelix	2.56469	3.15818	1.98088
SINPZ0500872	MYB	-1.93999	-1.54273	-1.81184
SINPZ0902252	MYB	-1.14409	-1.5337	1.04109
SINPZ1300846	MYB	-7.92982	-5.60887	-5.63533
SINPZ0000571	MYB	5.08869	7.09507	2.79777
SINPZ0701660	AP2-EREBP	-4.34829	3.56866	2.81
SINPZ1000211	AP2-EREBP	-2.65856	1.61217	1.04109
SINPZ1101190	MYB	2.76566	-1.03251	-1.41672
SINPZ0900868	C2H2	-2.40471	1.96517	1.39723
SINPZ1200763	NAC	-1.44598	1.29353	1.18373
SINPZ0400605	GeBP	3.53307	2.95812	2.67603
SINPZ0400600	GeBP	3.91177	2.55125	1.54873
SINPZ0101125	bHLH	2.49656	3.43969	2.00395
SINPZ0401256	WRKY	1.72693	6.94416	-2.12131
SINPZ0902370	zf-HD	1.43846	2.20489	-1.25555
SINPZ1301141	MADS	-1.59651	-1.92455	-3.10126
SINPZ1101519	Trihelix	-1.26861	1.46109	2.06144
SINPZ0200645	AP2-EREBP	-1.11984	-1.0753	-2.48955
SINPZ0100001	bHLH	-10.0034	-2.74998	-2.80926
SINPZ0000517	MYB	-1.93999	-1.54273	-1.81184
SINPZ0401341	LOB	1.9498	2.69215	1.85248
SINPZ1101026	NAC	-1.1617	-1.37804	-1.0119
SINPZ1000280	LIM	-1.05711	-1.03251	1.04109
SINPZ0901930	MADS	-2.34787	-4.25077	2.52763
SINPZ0401118	NAC	3.57242	1.72278	2.57728
SINPZ0101987	AP2-EREBP	-1.11436	1.77516	-2.35896
SINPZ0401197	MYB	1.61812	1.96779	1.04109
SINPZ0401192	AP2-EREBP	-1.21175	2.11302	2.0224
SINPZ0601983	GRAS	1.10173	1.07877	1.1679
SINPZ0300035	MYB	-1.52115	4.5211	3.34416
SINPZ0100344	MYB	3.39886	1.92101	1.28089
SINPZ0101678	bHLH	1.16778	1.58906	1.22472
SINPZ0400872	WRKY	-2.59371	3.90696	-2.62988
SINPZ0601630	MADS	2.07904	2.69779	1.66629
SINPZ1000019	RWP-RK	4.19522	1.95655	1.18686
SINPZ0600700	MADS	1.11135	1.1346	4.43401
SINPZ0101567	GRAS	-2.02245	1.54829	1.45864
SINPZ0801664	bHLH	1.91231	-1.37181	2.86308
SINPZ0501303	Trihelix	-8.55563	-4.74305	-4.39704

## Sheet: Table S7
Table S7. Primers used for the qRT-PCR.
Gene ID	Forward (5' to 3')	Reverse (5' to 3')
SiH3.3	GATGGCCCGTACTAAGCAAA	CACGGAGAGCAACAGTACCA
SINPZ0401244	TCAACCTGGAACGGATAA	ACTATGGCTTCTGCGATA
SINPZ0500116	TGTTCTATGTATGCTTAGGC	CTTGACGATGATGCGATT
SINPZ0902045	ACGGTGGACAACAACTTCCA	CACGTACTCCGTCGAGTTGA
SINPZ1100016	CTCCGATCGAAAATGGTCGC	TTGATCACGAGCAGCCTCTA
SINPZ1100090	TGCCACACGAACCATCAGAG	TCGGTGTATTGCCCAAGCAT
SINPZ1100793	CTAACAGCAGGCAAGAAG	ATCAGCACTCCACATCTT
SINPZ1201700	TAGACTGGAGAGGCTTAT	TCACCGTTGGATAGATAC
SINPZ1201748	CACCAATAATCGCAGAGTAT	AGACACCAAGTCCATCAG
